# Supplementary material for: Weighted gene coexpression network analysis and machine learning reveal oncogenome associated microbiome plays an important role in tumor immunity and prognosis in pan-cancer
Source: PubMed Central journal article supplement (PMC10422781; doi:10.1186/s12967-023-04411-0), 2023-08-12
Supplement: 12967_2023_4411_MOESM1_ESM.pdf [file 12967_2023_4411_MOESM1_ESM.pdf]

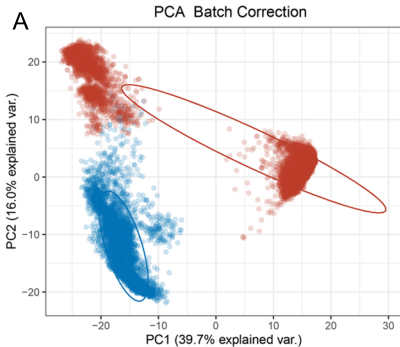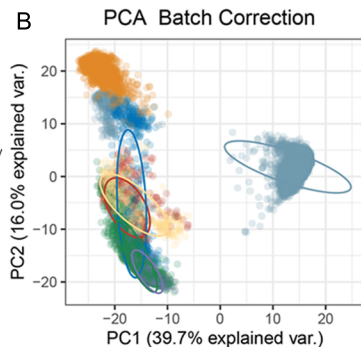

Data Submitting Center

- Baylor College of Medicine
- Broad Institute of MIT and Harvard
- Canada's Michael Smith Genome Sciences Centre
- Harvard Medical School
- MD Anderson – Institute for Applied Cancer Science
- University of North Carolina
- Washington University School of Medicine

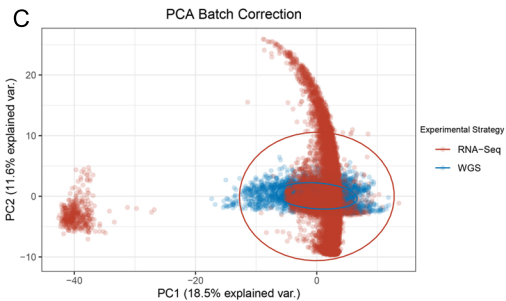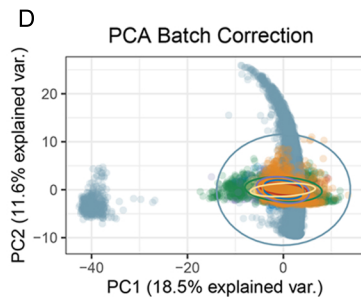

Data Submitting Center

- Baylor College of Medicine
- Broad Institute of MIT and Harvard
- Canada's Michael Smith Genome Sciences Centre
- Harvard Medical School
- MD Anderson – Institute for Applied Cancer Science
- University of North Carolina
- Washington University School of Medicine
