# Supplementary material for: Weighted gene coexpression network analysis and machine learning reveal oncogenome associated microbiome plays an important role in tumor immunity and prognosis in pan-cancer
Source: PubMed Central journal article supplement (PMC10422781; doi:10.1186/s12967-023-04411-0), 2023-08-12

A

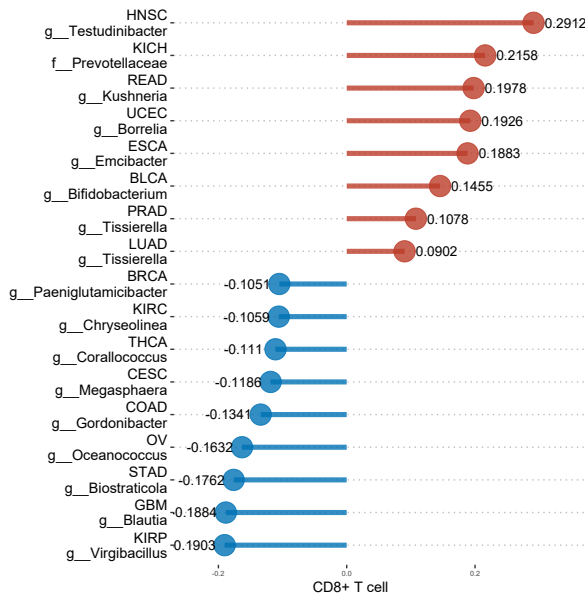

B

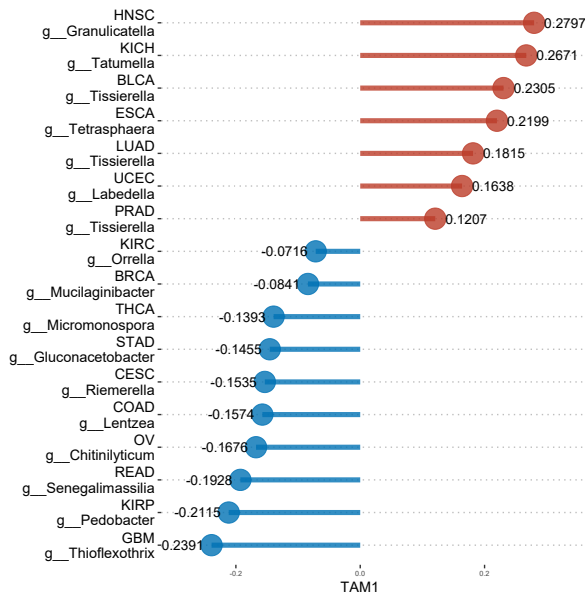

Supplement: 12967_2023_4411_MOESM4_ESM.pdf [file 12967_2023_4411_MOESM4_ESM.pdf]
