# Supplementary material for: Weighted gene coexpression network analysis and machine learning reveal oncogenome associated microbiome plays an important role in tumor immunity and prognosis in pan-cancer
Source: J Transl Med. 2023 Aug 12;21:537. doi: 10.1186/s12967-023-04411-0 (PMC10422781; doi:10.1186/s12967-023-04411-0)
Supplement: Supplementary file 5 — Additional file 5: Table S1. WGCNA parameters selection. WGCNA: weighted gene coexpression network Analysis. [file 12967_2023_4411_MOESM5_ESM.xlsx]

## Sheet: Sheet1
		microbiome				mRNA
cancer type	cancer type(abbreviation)	β	threshold	minModuleSize	Number of modules	β	minModuleSize	Number of modules
Breast Cancer	TCGA-BRCA	4	0	60	6	7	30	34
Endometrioid Cancer	TCGA-UCEC	3	0	30	14	16	30	13
Cervical Cancer	TCGA-CESC	3	3	30	8	6	60	39
Lung Squamous Cell Carcinoma	TCGA-LUSC	3	0	30	7	4	30	65
Lung Adenocarcinoma	TCGA-LUAD	2	0	30	9	7	30	31
Kidney Clear Cell Carcinoma	TCGA-KIRC	2	1	60	9	8	30	20
Glioblastoma	TCGA-GBM	3	7	30	13	5	30	40
Head and Neck Cancer	TCGA-HNSC	5	0	30	20	6	30	43
Thyroid Cancer	TCGA-THCA	4	1	30	8	10	30	22
Bladder Cancer	TCGA-BLCA	3	0	30	8	5	30	37
Stomach Cancer	TCGA-STAD	8	0	30	11	4	30	13
Colon Cancer	TCGA-COAD	4	3	30	6	20	30	7
Prostate Cancer	TCGA-PRAD	3	2	30	4	14	30	15
Esophageal Cancer	TCGA-ESCA	2	0	30	15	4	30	48
Ovarian Cancer	TCGA-OV	2	0	30	16	5	30	94
Rectal Cancer	TCGA-READ	9	1	30	11	10	60	18
Kidney Papillary Cell Carcinoma	TCGA-KIRP	3	0	30	8	12	60	12
Kidney Chromophobe	TCGA-KICH	3	0	30	9	12	60	19
