# Supplementary material for: Weighted gene coexpression network analysis and machine learning reveal oncogenome associated microbiome plays an important role in tumor immunity and prognosis in pan-cancer
Source: J Transl Med. 2023 Aug 12;21:537. doi: 10.1186/s12967-023-04411-0 (PMC10422781; doi:10.1186/s12967-023-04411-0)
Supplement: Supplementary file 6 — Additional file 6: Table S2. OAM and mRNA modules incorporated into the analysis. OAM: oncogenome associated microbiome module; mRNA: messenger ribonucleic acid. [file 12967_2023_4411_MOESM6_ESM.xlsx]

## Sheet: Sheet1
	microbiome							mRNA
cancer type	Module 1	n	Module 2	n	Module 3	n	sum	Module 1
TCGA-BRCA	brown	216	turquoise	279	blue	224	719	black	661
TCGA-UCEC	turquoise	168	cyan	41	pink	82	291	black	308
TCGA-CESC	brown	117	black	46	yellow	115	278	darkorange	152
TCGA-LUSC	turquoise	403	black	38	blue	131	572	lightcyan	228
TCGA-LUAD	blue	277	green	94	turquoise	411	782	black	825
TCGA-KIRC	brown	200	blue	208	green	153	561	lightyellow	220
TCGA-GBM	pink	73	yellow	123	turquoise	281	477	cyan	2555
TCGA-HNSC	turquoise	316	salmon	61	grey60	50	427	black	5477
TCGA-THCA	red	82	black	65	blue	117	264	darkgreen	1826
TCGA-BLCA	yellow	106	blue	178	brown	117	401	blue	1993
TCGA-STAD	blue	182	yellow	117	turquoise	375	674	cyan	7220
TCGA-COAD	green	106	turquoise	305	brown	174	585	turquoise	2096
TCGA-PRAD	blue	122	turquoise	160	brown	68	350	magenta	233
TCGA-ESCA	turquoise	1018	blue	224	red	124	1366	tan	327
TCGA-OV	red	141	turquoise	781	salmon	66	988	magenta	396
TCGA-READ	pink	52	turquoise	129	yellow	83	264	greenyellow	596
TCGA-KIRP	yellow	63	turquoise	337	red	54	454	darkgreen	442
TCGA-KICH	yellow	68	green	59	blue	176	303	darkturquoise	128
