# Supplementary material for: Weighted gene coexpression network analysis and machine learning reveal oncogenome associated microbiome plays an important role in tumor immunity and prognosis in pan-cancer
Source: J Transl Med. 2023 Aug 12;21:537. doi: 10.1186/s12967-023-04411-0 (PMC10422781; doi:10.1186/s12967-023-04411-0)
Supplement: Supplementary file 7 — Additional file 7: Table S3. ML hyperparameter tuning results. ML: machine learning. [file 12967_2023_4411_MOESM7_ESM.xlsx]

## Sheet: Distinguish of
	gradient boosting machine
cancer type	n.trees	interaction.depth	shrinkage	n.minobsinnode
TCGA-BRCA	150	3	0.1	5
TCGA-UCEC	50	2	0.1	5
TCGA-CESC	100	2	0.1	5
TCGA-LUSC	50	3	0.1	5
TCGA-LUAD	100	3	0.1	5
TCGA-KIRC	150	2	0.1	5
TCGA-GBM	150	2	0.1	5
TCGA-HNSC	150	2	0.1	5
TCGA-THCA	150	2	0.1	5
TCGA-BLCA	150	1	0.1	5
TCGA-STAD	150	3	0.1	5
TCGA-COAD	150	1	0.1	5
TCGA-PRAD	150	2	0.1	5
TCGA-ESCA	50	3	0.1	5
TCGA-OV	150	3	0.1	5
TCGA-READ	50	1	0.1	5
TCGA-KIRP	100	3	0.1	5
TCGA-KICH	50	1	0.1	5

## Sheet: Survive
	Coxnet		Random forest		Xgboost		Coxboost
cancer type	alpha	s	ntree	nodesize	log10(eta)	nrounds	stepno
TCGA-BRCA	0	0.55	2000	5	-6.14023	1400	600
TCGA-UCEC	0.55	0	600	20	-7.1636	100	1700
TCGA-CESC	0	0.39	1200	5	-4.09349	2700	600
TCGA-LUSC	0	0.11	600	30	-9.21034	700	850
TCGA-LUAD	0	0.55	1900	5	-6.14023	2400	1150
TCGA-KIRC	0	0.55	1500	5	-3.07011	700	2500
TCGA-GBM	1	0	1200	5	-4.09349	2000	850
TCGA-HNSC	0.44	0	600	5	-5.11686	2400	2250
TCGA-THCA	0	0	600	10	-1.02337	400	300
TCGA-BLCA	0.55	0	500	5	-5.11686	2700	2250
TCGA-STAD	0.11	0	800	5	-3.07011	400	2500
TCGA-COAD	0	0.22	800	5	-7.1636	2400	50
TCGA-ESCA	0	0.22	600	25	-5.11686	2400	300
TCGA-OV	0	0.11	1200	5	-2.04674	100	2500
TCGA-READ	0	28	600	5	-6.14023	1400	300
TCGA-KIRP	0	0.22	500	10	-3.07011	1000	600
TCGA-KICH	0.11	0	800	5	-5.11686	3000	600

## Sheet: Distinguish of TP53 mutations
	Random forest
num.trees	500
min node size	6
