# Supplementary material for: Weighted gene coexpression network analysis and machine learning reveal oncogenome associated microbiome plays an important role in tumor immunity and prognosis in pan-cancer
Source: J Transl Med. 2023 Aug 12;21:537. doi: 10.1186/s12967-023-04411-0 (PMC10422781; doi:10.1186/s12967-023-04411-0)
Supplement: Supplementary file 8 — Additional file 8: Table S4. The correlation of tumor microbiome with CD8+ T cells. CD: cluster of differentiation. [file 12967_2023_4411_MOESM8_ESM.xlsx]

## Sheet: BLCA
r	p	name
0.145476	0.000635657	g__Bifidobacterium
0.138193	0.00118191	g__Tetrasphaera

## Sheet: BRCA
r	p	name
-0.105102	0.0002636	g__Paeniglutamicibacter
-0.103444	0.000329646	g__Microbacterium
-0.100226	0.000504212	g__Carideicomes
-0.0998304	0.00053078	g__Acidipropionibacterium
-0.09844	0.000634949	g__Eubacterium
-0.0979983	0.000671824	g__Sphingomonas
-0.0953029	0.000943494	g__Nigerium
-0.0950199	0.000977272	g__Ideonella
-0.0941044	0.00109432	g__Candidatus Phytoplasma
-0.0930953	0.00123826	g__Methylobacterium
-0.0929398	0.00126195	g__Knoellia
-0.0928844	0.00127048	g__Lutibacter
-0.0928289	0.00127908	g__Arcobacter
-0.0920702	0.0014022	g__Algoriphagus
-0.0917785	0.00145237	g__Cladophialophora
-0.0910284	0.00158908	g__Lautropia
-0.0909399	0.00160598	g__Gemmobacter
-0.0908739	0.00161868	g__Nannizzia
-0.0906826	0.001656	g__Asticcacaulis
-0.0904846	0.00169549	g__Phytoactinopolyspora
-0.0899772	0.00180064	g__Phialemoniopsis
-0.0897857	0.00184185	g__Acidibrevibacterium
-0.0895877	0.00188536	g__Asaia
-0.0894716	0.00191133	g__Anaerobutyricum
-0.0893136	0.00194717	g__Brevibacterium
-0.0890844	0.00200027	g__Pseudarthrobacter
-0.0890805	0.00200119	g__Aquabacterium
-0.0889836	0.00202406	g__Afifella
-0.0888167	0.00206398	g__Nitratireductor
-0.0887016	0.00209194	g__Leptospira
-0.0886006	0.00211675	g__Phanerochaete
-0.0885931	0.00211862	g__Neohortaea
-0.0885491	0.00212951	g__Pseudopuniceibacterium
-0.0885427	0.00213111	g__Trematosphaeria
-0.0884268	0.0021601	g__Gloeophyllum
-0.0883911	0.00216909	g__Actinomyces
-0.0883221	0.00218659	g__Pestalotiopsis
-0.0881517	0.00223035	g__Micropruina
-0.0874807	0.00241058	g__Planococcus
-0.0865386	0.00268616	g__Aureobasidium
-0.0865011	0.00269768	g__Glutamicibacter
-0.0864151	0.00272434	g__Citricoccus
-0.0863132	0.00275621	k__Bacteria_p__Actinobacteria_c__Actinobacteria_o___f___g__
-0.0863038	0.00275916	g__Ramularia
-0.0861273	0.00281524	g__Trichosporon
-0.0857297	0.00294537	g__Halomonas
-0.0855114	0.00301912	g__Actinomadura
-0.0853096	0.00308879	g__Catenibacterium
-0.0850576	0.00317786	g__Kibdelosporangium
-0.0845054	0.00338128	g__Naumannella
-0.0844829	0.00338979	g__Jaminaea
-0.0841566	0.00351576	g__Metasolibacillus
-0.0841562	0.00351592	g__Marihabitans
-0.0838664	0.00363136	g__Nitrobacter
-0.0838439	0.00364045	g__Rhinocladiella
-0.0837183	0.00369167	g__Raineyella
-0.0837131	0.00369379	g__Compostimonas
-0.0836408	0.0037236	g__Mangrovicoccus
-0.0834891	0.00378679	g__Oceanibium
-0.0828025	0.00408524	g__Pseudoglutamicibacter
-0.0826281	0.00416439	g__Micrococcus
-0.0824948	0.00422582	g__Cloacibacterium
-0.0824812	0.00423212	g__Cystobacter
-0.0824539	0.00424481	g__Undibacterium
-0.0824274	0.00425719	g__Humibacter
-0.0823525	0.00429227	g__Pelomonas
-0.0822242	0.004353	g__Albidovulum
-0.0821828	0.00437278	g__Caedimonas
-0.0819237	0.00449835	g__Afipia
-0.0818251	0.00454697	g__Fusobacterium
-0.0814273	0.00474803	g__Corynebacterium
-0.0808294	0.00506535	g__Marssonina
-0.0807018	0.00513549	g__Cryobacterium
-0.0804728	0.00526358	g__Granulicatella
-0.0804408	0.00528169	g__Luteococcus
-0.0802707	0.00537905	g__Humibacillus
-0.0802588	0.00538593	g__Nitrospirillum
-0.08015	0.00544906	g__Dermabacter
-0.0799203	0.00558459	g__Hoeflea
-0.0798402	0.00563256	g__Dechloromonas
-0.0796966	0.00571953	g__Kangiella
-0.0794681	0.00586035	g__Tychonema
-0.0793586	0.00592894	g__Amnibacterium
-0.0792179	0.00601817	g__Dialister
-0.0791826	0.00604069	g__Neisseria
-0.0791298	0.00607461	g__Sphingorhabdus
-0.0788931	0.00622869	g__Microlunatus
-0.0788878	0.00623217	g__Rothia
-0.0787902	0.00629674	k__Bacteria_p__Actinobacteria_c__Actinobacteria_o__Actinomycetales_f__Actinomycetaceae_g__
-0.0785904	0.0064308	g__Pauljensenia
-0.0785335	0.00646949	g__Scytonema
-0.0783461	0.00659828	g__Granulicoccus
-0.0783439	0.00659979	g__Aliicoccus
-0.0782936	0.00663473	g__Nodularia
-0.0782601	0.00665812	g__Pseudopropionibacterium
-0.0781172	0.00675868	g__Pimelobacter
-0.0778427	0.00695561	g__Deinococcus
-0.0777273	0.00704001	g__Virgibacillus
-0.0776652	0.00708576	g__Brevilactibacter
-0.0773561	0.00731751	g__Herpetosiphon
-0.0773075	0.00735458	g__Clostridium
-0.0772716	0.00738203	g__Kingella
-0.0771197	0.0074993	g__Auraticoccus
-0.0769298	0.00764828	g__Brachybacterium
-0.0768949	0.00767598	g__Propioniferax
-0.0767856	0.00776321	g__Kurthia
-0.0765401	0.00796236	g__Ureibacillus
-0.0764765	0.0080147	g__Limnohabitans
-0.0764248	0.00805743	g__Gemella
-0.0763981	0.00807956	g__Aestuariimicrobium
-0.0760994	0.00833129	g__Thermosipho
-0.0758701	0.00852929	g__Xylona
-0.0757671	0.00861956	g__Oscillatoria
-0.0757457	0.00863847	g__Rhizobium
-0.0756883	0.00868921	g__Ruania
-0.0756024	0.00876575	g__Frondihabitans
-0.0755734	0.00879164	g__Microterricola
-0.0755027	0.00885523	g__Labrenzia
-0.0753741	0.00897198	g__Pararheinheimera
-0.0753468	0.00899695	g__Lachnellula
-0.0750999	0.00922538	g__Rubritepida
-0.0748577	0.00945452	g__Agaricus
-0.0748551	0.00945701	g__Rhodopseudomonas
-0.0748498	0.00946208	g__Thioflexothrix
-0.0748366	0.00947472	g__Marinifilum
-0.0748105	0.00949976	g__Mycobacteroides
-0.0748021	0.00950776	g__Campylobacter
-0.0745621	0.00974097	g__Morococcus
-0.0743416	0.00995966	g__Alloprevotella
-0.0742497	0.0100522	g__Isachenkonia
-0.0742297	0.0100723	g__Muricauda
-0.074189	0.0101136	g__Capnocytophaga
-0.074189	0.0101136	g__Miniimonas
-0.0741803	0.0101224	g__Edwardsiella
-0.0739527	0.0103561	g__Acuticoccus
-0.0738223	0.0104922	g__Finegoldia
-0.0737639	0.0105536	g__Cutibacterium
-0.0737482	0.0105701	g__Roseospira
-0.0736061	0.0107212	g__Exserohilum
-0.0735104	0.010824	g__Roseburia
-0.0734644	0.0108737	g__Mageeibacillus
-0.0734282	0.0109129	g__Pseudovirgaria
-0.0732974	0.0110559	g__Caldithrix
-0.0732704	0.0110856	g__Rubrimonas
-0.0732425	0.0111164	g__Sanguibacter
-0.0732404	0.0111187	g__Arcticibacter
-0.0731834	0.0111818	g__Spirulina
-0.0730601	0.0113194	g__Porphyromonas
-0.0730473	0.0113338	g__Leptotrichia
-0.0727906	0.0116255	g__Fertoebacter
-0.0727709	0.0116482	g__Marinilactibacillus
-0.0726785	0.0117549	g__Selenomonas
-0.0726451	0.0117938	g__Thermoanaerobaculum
-0.0723273	0.0121688	g__Wolbachia
-0.0721986	0.0123237	g__Antarcticibacterium
-0.0719055	0.012683	g__Hansschlegelia
-0.0717203	0.0129147	g__Varibaculum
-0.0716864	0.0129575	g__Jeotgalicoccus
-0.0716491	0.0130048	g__Allokutzneria
-0.0716403	0.013016	g__Hungatella
-0.0716306	0.0130282	g__Criibacterium
-0.0715372	0.0131475	g__Orenia
-0.071429	0.0132868	g__Spizellomyces
-0.0713902	0.013337	g__Croceicoccus
-0.0712497	0.0135204	g__Enterobacter
-0.0711757	0.0136179	g__Youhaiella
-0.0711466	0.0136564	g__Centipeda
-0.0710383	0.0138007	g__Kwoniella
-0.0708755	0.0140199	g__Dermacoccus
-0.0708237	0.0140902	g__Glaciihabitans
-0.070626	0.0143618	g__Aquidulcibacter
-0.0706016	0.0143956	g__Exiguobacterium
-0.0703663	0.0147255	g__Erysipelatoclostridium
-0.0703387	0.0147647	g__Weeksella
-0.0702347	0.014913	g__Grosmannia
-0.0702081	0.014951	g__Pseudoruminoccoccus
-0.0701515	0.0150325	g__Oceanibacterium
-0.0701219	0.0150751	g__Eremomyces
-0.0701196	0.0150785	k__Bacteria_p__Firmicutes_c__Bacilli_o__Lactobacillales_f__Streptococcaceae_g__
-0.0700401	0.0151939	g__Endozoicomonas
-0.0700286	0.0152106	g__Rhodoblastus
-0.0699185	0.0153718	g__Haemophilus
-0.0697501	0.0156211	g__Thauera
-0.0697342	0.0156449	g__Aphanothece
-0.0696496	0.0157717	g__Cutaneotrichosporon
-0.0696285	0.0158034	g__Yimella
-0.0696052	0.0158386	g__Ruegeria
-0.0694967	0.0160031	g__Jishengella
-0.0694662	0.0160497	g__Phialophora
-0.0693449	0.0162358	g__Sclerotinia
-0.0692874	0.0163247	g__Catellicoccus
-0.0692721	0.0163486	g__Novimethylophilus
-0.0691981	0.0164638	g__Paucibacter
-0.0691945	0.0164693	g__Raphidiopsis
-0.0691597	0.0165238	g__Pseudoruegeria
-0.0691597	0.0165238	g__Alternaria
-0.0690937	0.0166275	g__Jannaschia
-0.0690844	0.0166422	g__Thalassobius
-0.0690233	0.0167388	g__Roseibaca
-0.0690214	0.0167418	g__Piscinibacter
-0.0690213	0.016742	g__Shimia
-0.0689832	0.0168025	g__Nevskia
-0.0689658	0.0168301	g__Devriesea
-0.0689495	0.016856	g__Rhodocyclus
-0.0689407	0.0168702	g__Propionivibrio
-0.068927	0.0168921	g__Calderihabitans
-0.0689225	0.0168991	g__Confluentimicrobium
-0.0689031	0.0169302	g__Dolichospermum
-0.0688614	0.0169971	g__Enhydrobacter
-0.0688522	0.0170119	g__Pseudoduganella
-0.0688492	0.0170167	g__Amorphotheca
-0.0688484	0.017018	g__Maliponia
-0.0688184	0.0170663	g__Aureibaculum
-0.0687903	0.0171117	g__Palleronia
-0.0687234	0.0172199	g__Pontivivens
-0.0686129	0.0174004	g__Flavimaricola
-0.0685975	0.0174256	g__Sphaerotilus
-0.0685427	0.0175158	g__Limimaricola
-0.0685293	0.0175379	g__Cryptococcus
-0.0683985	0.0177549	g__Kroppenstedtia
-0.0683928	0.0177645	g__Azospirillum
-0.0683805	0.0177851	g__Starkeya
-0.0682806	0.0179527	g__Cellulomonas
-0.0682288	0.0180402	g__Mycobacterium
-0.0682102	0.0180716	g__Pseudoramibacter
-0.0682069	0.0180773	g__Kockovaella
-0.0680081	0.018417	g__Crocosphaera
-0.0679239	0.0185625	g__Reyranella
-0.0678906	0.0186205	g__Dissoconium
-0.067784	0.0188066	g__Bacteroides
-0.0677837	0.0188072	g__Streptococcus
-0.067701	0.0189528	g__Propionibacterium
-0.0676913	0.01897	g__Absiella
-0.0676406	0.0190597	g__Hymenobacter
-0.067639	0.0190627	g__Rhodopirellula
-0.0676226	0.0190917	g__Acetanaerobacterium
-0.0675066	0.019299	g__Gordonia
-0.0674957	0.0193186	g__Kitasatospora
-0.0674935	0.0193225	g__Legionella
-0.0674549	0.019392	g__Collinsella
-0.0674152	0.0194637	g__Massilia
-0.0673587	0.0195661	g__Thermogemmatispora
-0.067191	0.0198727	g__Marmoricola
-0.0670916	0.0200566	g__Methyloversatilis
-0.0669776	0.0202691	g__Primorskyibacter
-0.0668672	0.0204768	g__Aquamicrobium
-0.0668484	0.0205123	g__Lichenibacterium
-0.0666184	0.0209518	g__Ramlibacter
-0.0666108	0.0209665	g__Hassallia
-0.0665913	0.0210041	g__Ottowia
-0.06655	0.0210841	g__Halothiobacillus
-0.066532	0.021119	g__Meiothermus
-0.0665258	0.0211311	k__Bacteria_p__Bacteroidetes_c__Sphingobacteriia_o__Sphingobacteriales_f__Sphingobacteriaceae_g__
-0.0664827	0.0212149	g__Rasamsonia
-0.0664786	0.0212229	g__Aeromonas
-0.0664262	0.0213254	g__Gilliamella
-0.0664236	0.0213303	g__Citrobacter
-0.0663835	0.021409	g__Pseudoalteromonas
-0.0660107	0.0221524	g__Edaphovirga
-0.0659051	0.0223671	g__Helcobacillus
-0.0657803	0.022623	g__Tepidiphilus
-0.0655406	0.0231219	k__Bacteria_p__Firmicutes_c__Clostridia_o__Clostridiales_f__Clostridiales Family XIII. Incertae Sedis_g__
-0.0655387	0.0231258	g__Microbispora
-0.0655125	0.0231809	g__Punctularia
-0.0655073	0.0231919	g__Zymoseptoria
-0.0654546	0.023303	g__Aneurinibacillus
-0.06541	0.0233975	g__Neobittarella
-0.0653995	0.0234199	g__Bosea
-0.0653924	0.023435	g__Tilletiopsis
-0.0653666	0.0234897	g__Azonexus
-0.0653566	0.0235111	g__Methylocapsa
-0.0653449	0.0235361	k__Bacteria_p__Proteobacteria_c__Epsilonproteobacteria_o__Campylobacterales_f__Campylobacteraceae_g__
-0.0653336	0.0235602	g__Aquirufa
-0.0652104	0.0238245	g__Alterileibacterium
-0.065191	0.0238663	g__Variovorax
-0.0651745	0.0239019	g__Niveispirillum
-0.0651737	0.0239037	g__Pseudolabrys
-0.0651389	0.023979	g__Pseudacidovorax
-0.0651278	0.0240031	g__Inhella
-0.0651229	0.0240138	g__Blastomonas
-0.0650954	0.0240734	g__Bacilliculturomica
-0.0650954	0.0240734	g__Kandeliimicrobium
-0.0650954	0.0240734	g__Rhodovastum
-0.0650954	0.0240734	g__Kinneretia
-0.0650954	0.0240734	g__Turneriella
-0.0650954	0.0240734	g__Tilletiaria
-0.0650812	0.0241044	g__Azohydromonas
-0.0650661	0.0241373	g__Zasmidium
-0.0650423	0.0241892	g__Methylophilus
-0.0650352	0.0242049	g__Pararhizobium
-0.0648762	0.0245544	g__Treponema
-0.0648639	0.0245816	g__Actinotignum
-0.0648039	0.0247149	g__Rhodoferax
-0.0647865	0.0247537	g__Streptosporangium
-0.0647561	0.0248214	g__Acetobacter
-0.0647465	0.0248429	g__Thioclava
-0.0646748	0.0250037	g__Leptolyngbya
-0.0645697	0.0252408	g__Aurantimonas
-0.0645599	0.025263	g__Melaminivora
-0.0645175	0.0253594	g__Kamptonema
-0.0644882	0.025426	g__Stella
-0.0644375	0.025542	g__Abyssicoccus
-0.0644182	0.0255861	g__Mediterraneibacter
-0.0643722	0.0256918	k__Bacteria_p__Proteobacteria_c__Gammaproteobacteria_o__Cellvibrionales_f__Spongiibacteraceae_g__
-0.0643517	0.025739	g__Shewanella
-0.064343	0.0257591	g__Thioalbus
-0.0643355	0.0257763	g__Anaerobiospirillum
-0.0643297	0.0257897	g__Rahnella
-0.0643291	0.0257913	g__Rhodomicrobium
-0.0642908	0.0258797	g__Diplodia
-0.0642255	0.0260314	g__Litorilinea
-0.064157	0.0261912	g__Nostoc
-0.0641562	0.0261929	g__Albimonas
-0.0640448	0.0264549	g__Westerdykella
-0.0640383	0.0264702	g__Fusicatenibacter
-0.0640133	0.0265293	g__Paraclostridium
-0.0640055	0.0265477	g__Kluyvera
-0.0639991	0.026563	g__Alloiococcus
-0.0639968	0.0265683	g__Devosia
-0.0638922	0.0268172	g__Moraxella
-0.063745	0.0271707	g__Rhizorhabdus
-0.0637428	0.027176	g__Lindgomyces
-0.0636839	0.0273186	g__Rheinheimera
-0.0636695	0.0273535	g__Filomicrobium
-0.0636652	0.0273638	g__Agrococcus
-0.0636213	0.0274707	g__Stomatobaculum
-0.0636098	0.0274988	g__Akkermansia
-0.0634907	0.0277907	g__Pseudorivibacter
-0.0634665	0.0278504	g__Eggerthia
-0.0634582	0.0278709	g__Mogibacterium
-0.0634311	0.0279378	g__Leuconostoc
-0.0633591	0.0281165	g__Heterobasidion
-0.0632727	0.028332	g__Herbihabitans
-0.063228	0.0284442	g__Alistipes
-0.0631756	0.028576	g__Defluviimonas
-0.0631099	0.0287421	g__Streptobacillus
-0.0630798	0.0288186	g__Robiginitalea
-0.0630428	0.0289127	g__Veillonella
-0.0629183	0.0292313	g__Lachnoanaerobaculum
-0.0628583	0.029386	g__Riemerella
-0.0628427	0.0294264	g__Histidinibacterium
-0.0628032	0.0295287	g__Faecalimonas
-0.0627819	0.029584	g__Klenkia
-0.062777	0.0295968	g__Johnsonella
-0.0627699	0.0296151	g__Paraoceanicella
-0.0627335	0.0297101	g__Azorhizobium
-0.0626625	0.0298957	k__Bacteria_p__Firmicutes_c__Bacilli_o__Lactobacillales_f__Leuconostocaceae_g__
-0.0625802	0.0301121	g__Pseudomicrostroma
-0.0625021	0.0303187	g__Salinarimonas
-0.0623379	0.0307572	g__Schaalia
-0.0623257	0.03079	g__Tepidimonas
-0.0621682	0.031216	g__Magnetospirillum
-0.0620718	0.0314793	g__Modestobacter
-0.0619894	0.0317059	g__Oscillochloris
-0.0619367	0.0318514	g__Flavobacterium
-0.0619169	0.0319064	g__Sphaerospermopsis
-0.0618387	0.0321237	k__Bacteria_p__Bacteroidetes_c__Bacteroidia_o__Bacteroidales_f__Prevotellaceae_g__
-0.0618288	0.0321513	g__Metschnikowia
-0.0618109	0.0322013	g__Auricoccus
-0.0617659	0.0323272	g__Telmatospirillum
-0.0616867	0.03255	k__Bacteria_p__Firmicutes_c__Clostridia_o__Clostridiales_f__Lachnospiraceae_g__
-0.0616789	0.0325719	g__Didymella
-0.0616097	0.0327679	g__Olsenella
-0.0616035	0.0327854	g__Cardiobacterium
-0.0615166	0.0330327	g__Hylemonella
-0.0614999	0.0330806	g__Mitosporidium
-0.0613776	0.0334317	g__Richelia
-0.0611968	0.033957	g__Rodentibacter
-0.0611461	0.0341057	g__Aggregatibacter
-0.0610822	0.0342935	g__Altererythrobacter
-0.0610412	0.0344147	g__Flaviflexus
-0.0610012	0.034533	g__Curvibacter
-0.0608961	0.034846	g__Nocardiopsis
-0.060895	0.0348494	g__Cellvibrio
-0.0608393	0.0350163	g__Parvimonas
-0.0607375	0.035323	g__Aquincola
-0.0607076	0.0354134	g__Arcanobacterium
-0.0606665	0.0355381	g__Enterocloster
-0.0604658	0.0361527	g__Pulveribacter
-0.0604612	0.0361671	g__Zavarzinia
-0.0603998	0.0363568	g__Saccharopolyspora
-0.0603401	0.0365424	g__Polaribacter
-0.0602444	0.0368411	g__Arthrobacter
-0.0601369	0.0371795	g__Stenoxybacter
-0.0601118	0.037259	g__Negativicoccus
-0.0600631	0.0374134	g__Dorea
-0.0600411	0.0374832	g__Kribbia
-0.0599905	0.0376443	g__Eikenella
-0.0599527	0.0377652	g__Barrientosiimonas
-0.0599476	0.0377817	g__Pseudokineococcus
-0.0599155	0.0378847	g__Williamsia
-0.0599015	0.0379296	g__Pseudoscardovia
-0.0598521	0.0380887	g__Phreatobacter
-0.0598383	0.0381329	g__Terracoccus
-0.0598308	0.0381571	g__Prosthecomicrobium
-0.0598084	0.0382296	g__Hespellia
-0.0597367	0.0384622	g__Siculibacillus
-0.0597353	0.0384668	g__Jonquetella
-0.0596974	0.0385903	g__Cedecea
-0.0596874	0.0386227	g__Brochothrix
-0.0596845	0.0386323	g__Promicromonospora
-0.0595785	0.0389796	g__Daldinia
-0.0595684	0.0390126	g__Shinella
-0.059486	0.0392847	g__Serinicoccus
-0.0594615	0.0393658	g__Lachnospira
-0.0593851	0.0396199	g__Dakarella
-0.0593046	0.039889	g__Escherichia
-0.0592874	0.0399467	g__Aeribacillus
-0.0592535	0.0400607	k__Bacteria_p__Proteobacteria_c__Gammaproteobacteria_o__Pasteurellales_f__Pasteurellaceae_g__
-0.0592332	0.0401289	g__Kosakonia
-0.0591998	0.0402419	g__Ferruginivarius
-0.0591581	0.0403829	g__Paenirhodobacter
-0.0591493	0.0404128	g__Hafnia
-0.0591115	0.0405411	g__Alcanivorax
-0.0591091	0.0405493	g__Lacisediminimonas
-0.0590652	0.0406986	g__Bulleidia
-0.0590352	0.0408013	g__Mesosutterella
-0.0589601	0.0410587	g__Moesziomyces
-0.0589567	0.0410702	g__Methylovulum
-0.0588411	0.0414692	g__Sporothrix
-0.0587988	0.0416161	g__Gallibacterium
-0.0587911	0.0416427	g__Actinoplanes
-0.0587826	0.0416722	g__Butyricimonas
-0.0586916	0.0419899	g__Faecalibacillus
-0.0586821	0.0420233	g__Methylocella
-0.058629	0.0422097	g__Methylococcus
-0.0586169	0.0422524	g__Brenneria
-0.0585671	0.0424279	g__Catellatospora
-0.0585251	0.0425765	g__Enteractinococcus
-0.0585206	0.0425927	g__Microvirgula
-0.0585075	0.0426389	g__Roseiarcus
-0.0584836	0.0427238	k__Bacteria_p__Proteobacteria_c__Betaproteobacteria_o__Burkholderiales_f__Sutterellaceae_g__
-0.0584515	0.0428379	g__Faecalicatena
-0.0584477	0.0428517	g__Lelliottia
-0.0584298	0.0429155	g__Frisingicoccus
-0.0584298	0.0429155	g__Intestinibacter
-0.0583965	0.0430343	g__Propionimicrobium
-0.0583651	0.0431468	g__Oharaeibacter
-0.0583633	0.0431533	g__Intestinimonas
-0.0583458	0.0432159	g__Eggerthella
-0.0583128	0.0433346	g__Blastochloris
-0.0582873	0.0434263	g__Chroococcidiopsis
-0.0581951	0.0437597	g__Parascardovia
-0.0581877	0.0437863	g__Leifsonia
-0.0581834	0.0438021	g__Ureaplasma
-0.0581761	0.0438287	g__Necropsobacter
-0.058098	0.044113	g__Pasteurella
-0.0580763	0.0441922	g__Caballeronia
-0.0579516	0.0446503	g__Eisenbergiella
-0.0579516	0.0446503	g__Lachnoclostridium
-0.0579516	0.0446503	g__Sellimonas
-0.0579414	0.0446878	g__Lactonifactor
-0.0579385	0.0446984	g__Marinomonas
-0.057843	0.0450522	g__Trametes
-0.0578207	0.0451352	g__Shigella
-0.0578126	0.0451655	g__Cyberlindnera
-0.0578054	0.045192	g__Phragmitibacter
-0.0578008	0.0452093	g__Enterobacillus
-0.0574793	0.0464211	g__Bizionia
-0.057396	0.0467394	g__Polynucleobacter
-0.0573917	0.0467561	g__Desertiactinospora
-0.0573716	0.0468331	g__Vogesella
-0.0573592	0.0468807	g__Anaeroglobus
-0.057345	0.0469355	g__Chelatococcus
-0.0573422	0.0469462	g__Pandoraea
-0.0573336	0.0469792	g__Enterovirga
-0.0573078	0.0470788	k__Bacteria_p__Bacteroidetes_c__Bacteroidia_o__Bacteroidales_f__Dysgonamonadaceae_g__
-0.0571984	0.0475022	g__Cupriavidus
-0.0571293	0.0477715	g__Neofamilia
-0.0571192	0.047811	g__Pannonibacter
-0.0570206	0.0481973	g__Blastococcus
-0.0569583	0.0484429	g__Cercospora
-0.0569015	0.0486679	g__Ignatzschineria
-0.0568977	0.0486826	g__Winkia
-0.0568715	0.0487867	g__Brachyspira
-0.0568661	0.0488084	g__Salinicola
-0.0568501	0.0488719	g__Tetzosporium
-0.056808	0.0490398	g__Variibacter
-0.0565907	0.0499135	g__Geminicoccus
-0.05657	0.0499971	g__Fastidiosipila

## Sheet: CESC
r	p	name
-0.118638	0.0222838	g__Megasphaera
0.116608	0.0246963	g__Tissierella

## Sheet: COAD
r	p	name
-0.134105	0.00674067	g__Gordonibacter
-0.113368	0.0221689	g__Arabia
-0.111343	0.0246824	g__Intestinibacillus
-0.108613	0.0284566	g__Pygmaiobacter
-0.10661	0.0315328	g__Extibacter
0.104771	0.0346021	g__Vibrio
-0.103321	0.0371969	g__Peptostreptococcus
0.102967	0.0378559	g__Kushneria
-0.102347	0.0390333	g__Gramella
-0.100705	0.0422986	g__Sellimonas

## Sheet: ESCA
r	p	name
0.188346	0.00787667	g__Emcibacter
0.180663	0.0108635	g__Fabibacter
0.179005	0.0116264	g__Geminicoccus
0.170621	0.0162482	k__Bacteria_p__Proteobacteria_c__Alphaproteobacteria_o__Rhodospirillales_f__Acetobacteraceae_g__
0.169439	0.0170138	g__Alkalilimnicola
0.169052	0.0172717	g__Bartonella
0.167576	0.0182853	g__Malonomonas
0.16735	0.0184456	g__Thalassospira
0.166047	0.0193898	g__Zhengella
0.164771	0.0203552	g__Pantoea
0.159021	0.0252401	g__Syntrophaceticus
0.15861	0.0256241	g__Phytobacter
0.15829	0.0259276	g__Dokdonella
0.157877	0.026323	g__Thermovibrio
0.156869	0.0273106	g__Algiphilus
0.15559	0.028609	g__Plesiomonas
0.155535	0.0286657	g__Syntrophobacter
0.155253	0.0289597	g__Stappia
0.154991	0.0292354	g__Parahaliea
0.15352	0.0308227	g__Luminiphilus
0.152849	0.0315706	g__Marinimicrobium
0.152174	0.032338	g__Blastochloris
0.151555	0.0330564	g__Mesotoga
0.151485	0.0331393	g__Thalassobaculum
0.150602	0.0341892	g__Devosia
0.149965	0.0349645	g__Desulfurobacterium
0.149313	0.0357733	g__Kosakonia
-0.148919	0.0362695	g__Prevotella
0.14825	0.0371249	g__Steroidobacter
0.147978	0.0374782	g__Belliella
0.147906	0.0375714	g__Cronobacter
0.147677	0.0378716	g__Agitococcus
0.146922	0.0388749	g__Magnetofaba
0.14681	0.0390258	g__Rudaea
0.146135	0.0399437	g__Desulfocurvus
0.145732	0.040502	g__Methylophilus
0.145208	0.0412359	g__Fastidiosibacter
0.144555	0.042166	g__Thiohalocapsa
0.143291	0.0440181	g__Edaphovirga
-0.143009	0.0444398	k__Bacteria_p__Firmicutes_c__Bacilli_o__Bacillales_f___g__
0.14286	0.0446647	g__Hydrocarboniclastica
0.1428	0.0447553	g__Desulfobacca
0.142739	0.0448479	g__Sinimarinibacterium
0.141776	0.046326	g__Enterobacillus
0.141638	0.0465407	g__Nonlabens
0.141478	0.0467926	g__Cobetia
0.140616	0.0481618	g__Solirubrum
0.140459	0.0484142	g__Halioglobus
0.139841	0.0494206	g__Thermodesulfovibrio

## Sheet: GBM
r	p	name
-0.188425	0.0108549	g__Blautia
-0.177238	0.0166846	g__Paenarthrobacter
-0.163399	0.0275233	g__Oceanibium
-0.15777	0.0334112	g__Saezia
-0.150029	0.0432273	g__Crocosphaera
-0.146753	0.0480545	g__Cyclobacterium
-0.146545	0.0483754	g__Aphanothece
0.146135	0.0490137	g__Micromonospora

## Sheet: HNSC
r	p	name
0.291215	0.000154839	g__Testudinibacter
0.288916	0.000175457	g__Sporothrix
0.286034	0.00020491	g__Alkaliphilus
0.284644	0.000220707	g__Muribacter
0.274237	0.000380203	g__Thaumasiovibrio
0.274193	0.000381055	g__Anaerobacillus
0.271066	0.000446843	g__Geothrix
0.257574	0.000869437	g__Nitriliruptor
0.252923	0.00108497	g__Halocynthiibacter
0.25267	0.00109801	g__Pectinatus
0.248462	0.00133668	g__Anaerolinea
-0.248323	0.00134534	k__Bacteria_p__Bacteroidetes_c__Bacteroidia_o__Bacteroidales_f__Prevotellaceae_g__
0.246876	0.00143834	g__Gemmatimonas
0.243904	0.00164801	g__Calorimonas
0.242978	0.00171878	g__Desulfotignum
0.242561	0.00175162	g__Leptolinea
0.241953	0.00180038	g__Parashewanella
0.239971	0.00196828	g__Syntrophaceticus
0.239615	0.00199987	g__Floricoccus
0.23887	0.00206763	g__Robiginitomaculum
0.237833	0.0021652	g__Nodosilinea
0.236899	0.0022568	g__Chelonobacter
-0.236433	0.00230375	g__Rubrivivax
0.236079	0.00234003	g__Vespertiliibacter
0.235727	0.00237657	g__Occallatibacter
0.235038	0.00244966	g__Phocoenobacter
0.233746	0.00259223	g__Gloeobacter
0.232784	0.00270328	g__Nicoletella
0.231176	0.00289848	g__Bryobacter
0.229569	0.00310616	g__Flexistipes
0.228784	0.00321243	g__Pacificibacter
0.228744	0.003218	g__Aliiglaciecola
0.227466	0.00339836	g__Brevifollis
0.227452	0.00340034	g__Spiribacter
0.227345	0.0034158	g__Litorilituus
0.227034	0.00346128	g__Borreliella
0.226331	0.00356602	g__Caldithrix
0.226103	0.0036006	g__Sodalis
0.225556	0.00368487	g__Desulfurispora
0.224149	0.00390974	g__Halolactibacillus
0.223995	0.00393505	g__Kriegella
0.223885	0.00395318	k__Bacteria_p__Proteobacteria_c__Alphaproteobacteria_o__Rhodospirillales_f__Acetobacteraceae_g__
0.223239	0.00406158	g__Salinivibrio
0.222479	0.00419245	g__Wigglesworthia
0.22221	0.00423967	g__Microchaete
0.221398	0.0043852	g__Glaciecola
0.21975	0.0046944	g__Lascolabacillus
0.219476	0.00474763	g__Thorsellia
0.219266	0.00478883	g__Pseudanabaena
0.219138	0.00481412	g__Lonepinella
0.218937	0.00485399	g__Swingsia
0.218705	0.00490043	g__Psychromonas
0.218567	0.0049282	g__Alkalicoccus
0.217963	0.00505143	g__Acetohalobium
0.217953	0.00505369	g__Thermodesulfitimonas
0.217948	0.00505454	g__Geovibrio
0.217513	0.00514516	g__Ectothiorhodospira
0.217363	0.00517684	g__Hydrococcus
0.21717	0.00521761	g__Rippkaea
0.216331	0.00539883	g__Estrella
0.2161	0.0054496	g__Ghiorsea
0.215766	0.00552397	g__Gloeomargarita
0.215749	0.00552764	g__Desulfobacula
0.215399	0.00560667	g__Pleurocapsa
0.215327	0.00562294	g__Caviibacterium
0.215325	0.0056234	g__Neiella
0.21519	0.00565419	g__Thalassobacillus
0.215085	0.00567825	g__Denitrovibrio
0.214975	0.00570334	g__Pelodictyon
0.214906	0.00571921	g__Moritella
0.213973	0.00593819	g__Hydrogenivirga
0.213973	0.00593819	g__Neptunicoccus
0.213796	0.00598067	k__Bacteria_p__Proteobacteria_c__Alphaproteobacteria_o__Rhodospirillales_f__Rhodospirillaceae_g__
0.213538	0.00604294	g__Subdoligranulum
0.213392	0.00607842	g__Pasteuria
0.213296	0.00610174	g__Seleniivibrio
0.213019	0.00616983	g__Cylindrospermopsis
0.212088	0.00640361	g__Thiomicrospira
0.211822	0.0064718	g__Parasporobacterium
0.211779	0.00648288	g__Anaerotruncus
0.210153	0.00691499	g__Dictyobacter
0.208837	0.00728297	g__Neptuniibacter
0.207787	0.00758916	g__Natronospirillum
0.207754	0.00759888	g__Cricetibacter
0.20753	0.00766569	g__Catelliglobosispora
0.207285	0.00773961	g__Desulfovermiculus
0.2065	0.00797989	g__Oceanotoga
0.20631	0.00803908	g__Acholeplasma
0.204597	0.0085905	g__Lacimicrobium
0.204344	0.00867455	g__Cylindrospermum
0.203188	0.00906875	g__Rickettsia
0.202404	0.00934488	g__Conservatibacter
0.201703	0.00959831	g__Mariprofundus
0.201425	0.00970024	g__Tetrasphaera
0.201188	0.00978807	k__Bacteria_p__Proteobacteria_c__Gammaproteobacteria_o__Oceanospirillales_f___g__
0.200162	0.0101765	g__Lachnobacterium
0.199358	0.0104902	g__Marortus
0.198859	0.0106888	g__Catellicoccus
0.197656	0.0111821	g__Massilibacillus
0.197218	0.0113666	g__Limnochorda
0.196404	0.011717	g__Orbus
0.195773	0.0119947	g__Poseidonocella
0.19512	0.0122883	g__Harryflintia
0.194962	0.0123602	g__Acidipila
0.19494	0.0123702	g__Desulfobacterium
0.194782	0.0124428	g__Sulfurirhabdus
0.194388	0.0126248	g__Aminipila
0.193067	0.0132527	g__Thiorhodospira
0.192383	0.0135885	g__Ursidibacter
0.188438	0.015674	g__Ammonifex
0.188079	0.0158774	g__Cosenzaea
0.184922	0.0177628	g__Gloeothece
0.184287	0.0181648	g__Pelosinus
0.184231	0.0182006	g__Sporomusa
0.183486	0.018683	g__Hellea
0.18326	0.0188317	g__Gudongella
0.182268	0.0194954	g__Proteiniphilum
0.180134	0.0209928	g__Caloramator
0.179482	0.0214698	g__Stanieria
0.178868	0.0219276	g__Ilumatobacter
0.176905	0.0234472	g__Catenovulum
0.176738	0.0235805	g__Crinalium
0.173341	0.0264388	g__Basfia
0.172879	0.0268502	g__Fervidicella
0.172759	0.0269579	g__Natranaerovirga
0.170037	0.0294989	g__Avibacterium
-0.168157	0.0313703	g__Globicatella
0.167551	0.0319956	g__Listeria
0.166522	0.0330796	g__Paraperlucidibaca
0.1662	0.0334255	g__Rubritalea
0.165643	0.0340314	g__Clostridiisalibacter
0.165139	0.0345864	g__Alcanivorax
0.164238	0.0355997	g__Inordinaticella
0.163428	0.0365312	g__Criblamydia
0.1626	0.0375037	g__Actinoallomurus
0.1626	0.0375045	g__Photobacterium
0.160974	0.0394793	g__Anaerovirgula
0.160471	0.040108	g__Hungatella
-0.160045	0.0406468	g__Suttonella
0.158601	0.0425192	g__Schwartzia
0.157548	0.0439285	g__Anaeromicrobium
0.155628	0.0466017	g__Calidithermus
0.154574	0.0481247	g__Intestinimonas
-0.153724	0.0493831	g__Alistipes

## Sheet: KICH
r	p	name
0.21582	0.0211004	k__Bacteria_p__Bacteroidetes_c__Bacteroidia_o__Bacteroidales_f__Prevotellaceae_g__
-0.193587	0.0390433	g__Edaphovirga
-0.192026	0.0406805	g__Mangrovibacter
-0.18899	0.0440301	g__Tetzosporium
-0.188194	0.0449448	g__Alicycliphilus
-0.184921	0.0488755	g__Marinobacter

## Sheet: KIRC
r	p	name
-0.105946	0.000736309	g__Chryseolinea
-0.104642	0.000856316	g__Singulisphaera
-0.103719	0.000951992	g__Cystobacter
-0.103015	0.0010315	g__Thermosporothrix
-0.101647	0.00120374	g__Hyalangium
-0.0999436	0.00145534	g__Minicystis
-0.0986383	0.00167992	g__Winogradskyella
-0.0969703	0.00201317	g__Melittangium
-0.0963515	0.0021515	g__Tropheryma
-0.096168	0.00219414	g__Lacunisphaera
-0.0957017	0.00230606	g__Umezawaea
-0.0953093	0.00240424	g__Labilithrix
-0.095042	0.00247331	g__Chitiniphilus
-0.094388	0.00264998	g__Isosphaera
-0.093072	0.00304086	g__Polyangium
-0.0917849	0.00347324	g__Spirillospora
-0.0911396	0.00371042	g__Arenibacter
-0.0894163	0.00441755	g__Mycetohabitans
-0.0894051	0.00442252	g__Rubinisphaera
-0.0891818	0.00452267	g__Nannocystis
-0.0891341	0.00454434	g__Hippea
-0.0888004	0.00469848	g__Waddlia
-0.0884501	0.0048654	g__Desulfosoma
-0.0882932	0.0049419	g__Dichotomicrobium
-0.0878816	0.00514766	k__Bacteria_p__Planctomycetes_c___o___f___g__
-0.0874459	0.00537391	g__Salinibacterium
-0.0871908	0.00551051	g__Kandeliimicrobium
-0.087158	0.0055283	g__Fuerstia
-0.0871412	0.00553743	g__Blastopirellula
-0.0865321	0.00587783	g__Geminisphaera
-0.0864927	0.00590045	g__Rhodoglobus
-0.0864355	0.0059335	g__Cryomorpha
-0.0862903	0.00601806	g__Vulgatibacter
-0.0854954	0.00650065	g__Limisphaera
-0.0853384	0.00659995	g__Stigmatella
-0.0848245	0.00693467	g__Jishengella
-0.0844362	0.00719759	g__Nitrosovibrio
-0.084215	0.00735133	g__Desulforegula
-0.0839025	0.00757353	g__Desulfohalobium
-0.0829172	0.00831406	g__Aquisphaera
-0.0826938	0.00849067	g__Halolactibacillus
-0.0826471	0.00852799	g__Gimesia
-0.08144	0.00954563	g__Paralcaligenes
-0.0813904	0.00958959	g__Desulfocapsa
-0.0811261	0.00982737	g__Methylacidiphilum
-0.0804227	0.0104857	g__Thioalbus
-0.0803479	0.0105579	g__Rudaea
-0.0800817	0.0108187	g__Gallionella
-0.079973	0.0109269	g__Ferriphaselus
-0.0798357	0.0110648	g__Desulfonatronum
-0.079449	0.0114616	g__Litorimonas
-0.0790246	0.0119116	g__Estrella
-0.0785537	0.0124292	g__Aminivibrio
-0.0785269	0.0124592	g__Microbispora
-0.0784311	0.0125671	g__Desulfamplus
-0.0781656	0.0128705	g__Cephaloticoccus
-0.0778701	0.0132158	g__Pseudofulvimonas
-0.0776768	0.0134461	g__Anaerohalosphaera
-0.0775745	0.0135693	g__Geothrix
-0.0774511	0.0137194	g__Salinisphaera
-0.0773297	0.0138685	g__Syntrophobacter
-0.0772614	0.0139529	g__Sulfuriflexus
-0.0769925	0.0142899	g__Chlamydia
-0.0767728	0.0145706	g__Lacipirellula
-0.0767386	0.0146147	g__Criblamydia
-0.076662	0.014714	g__Dictyoglomus
0.0766185	0.0147706	g__Luteimonas
-0.0765502	0.0148599	g__Desulfonatronospira
-0.076362	0.0151084	g__Ghiorsea
-0.0762951	0.0151977	g__Rhodomicrobium
-0.076095	0.0154672	g__Joostella
-0.0760838	0.0154825	g__Desulfobacula
-0.0755278	0.0162545	g__Desulfacinum
-0.0754676	0.0163401	g__Psychroserpens
-0.0753962	0.0164421	g__Nibricoccus
-0.0752128	0.0167068	g__Planobispora
-0.074932	0.0171192	g__Candidatus Nardonella
0.0747904	0.0173305	g__Verminephrobacter
-0.0746536	0.0175368	g__Dissulfuribacter
-0.0746236	0.0175824	g__Pelobacter
-0.0746109	0.0176016	g__Catenulispora
-0.074598	0.0176212	g__Simkania
-0.0741591	0.0183006	g__Holophaga
-0.0740312	0.0185028	g__Terracidiphilus
-0.0740141	0.01853	g__Crateriforma
-0.0739208	0.018679	g__Acidimicrobium
-0.0737539	0.018948	g__Cellulophaga
-0.0737022	0.019032	g__Jiulongibacter
-0.0735197	0.0193313	g__Nitrosospira
-0.0733282	0.0196497	g__Haloactinopolyspora
-0.0732825	0.0197264	g__Nitrospina
-0.073199	0.019867	g__Ereboglobus
-0.0731311	0.0199821	g__Gelidibacter
-0.0730499	0.0201205	g__Opitutus
-0.072945	0.0203005	g__Hyphomonas
-0.0729102	0.0203606	g__Occallatibacter
-0.0726495	0.0208152	g__Ferrovum
-0.0725038	0.0210731	g__Thermoleophilum
-0.0723974	0.0212631	g__Henriciella
-0.0723115	0.0214176	g__Desulfobacca
-0.0721601	0.0216925	g__Arsenicitalea
-0.0720228	0.0219444	g__Mariniblastus
-0.071992	0.0220011	g__Geothermobacter
-0.0717599	0.0224336	g__Embleya
-0.0714907	0.0229445	g__Tuwongella
-0.0714702	0.0229837	g__Bryocella
-0.0714076	0.0231042	g__Millisia
-0.071147	0.0236113	g__Ilumatobacter
-0.0709815	0.0239384	g__Anaeromyxobacter
-0.0707609	0.0243803	g__Desulfosarcina
-0.070754	0.0243942	g__Terrimicrobium
0.0702522	0.0254266	g__Kinneretia
-0.0700084	0.0259417	g__Tepidiforma
-0.0697269	0.0265476	g__Allokutzneria
-0.0696932	0.0266208	g__Geomonas Xu et al. 2019
-0.0695072	0.0270289	g__Aurantimicrobium
-0.0694919	0.0270627	g__Pontimonas
-0.0694257	0.0272093	g__Desulfonatronovibrio
-0.0693977	0.0272714	g__Desulfatibacillum
-0.0692837	0.0275263	g__Paraoerskovia
-0.0691779	0.0277644	g__Thermoflexibacter
-0.069109	0.0279204	g__Desulfofustis
-0.0689946	0.0281811	g__Acidithrix
-0.068985	0.028203	g__Pseudolysobacter
-0.068898	0.0284029	g__Planctomicrobium
-0.0687717	0.0286953	g__Dethiosulfatarculus
-0.0687619	0.0287181	g__Bremerella
0.0684386	0.0294786	g__Methylibium
-0.0684191	0.029525	g__Thermasporomyces
-0.0681256	0.0302311	g__Desulfuromusa
-0.0680976	0.0302993	g__Desulfurivibrio
-0.0679259	0.0307199	g__Thiohalobacter
-0.0679247	0.0307231	g__Coraliomargarita
-0.0678385	0.0309361	g__Rickettsia
-0.0675838	0.0315732	g__Fluoribacter
-0.067133	0.0327283	g__Schlesneria
-0.0670689	0.0328953	g__Enhygromyxa
-0.0669836	0.0331189	g__Thiopseudomonas
-0.0668364	0.0335076	g__Herbidospora
-0.0667428	0.0337571	g__Sorangium
-0.0667051	0.033858	g__Panacagrimonas
-0.0666737	0.0339421	g__Solimicrobium
-0.0662452	0.035109	g__Rubripirellula
-0.0661258	0.03544	g__Maribacter
-0.0658783	0.0361351	g__Zavarzinella
-0.0657365	0.0365384	g__Cerasibacillus
-0.0657145	0.0366016	g__Wenzhouxiangella
-0.065639	0.0368181	g__Terriglobus
-0.0652227	0.0380322	g__Lascolabacillus
-0.0651752	0.038173	g__Homoserinimonas
-0.065005	0.0386807	g__Oleiagrimonas
-0.064776	0.0393728	g__Allosalinactinospora
-0.0647353	0.0394971	g__Glaciihabitans
-0.0644689	0.0403178	g__Methylacidimicrobium
-0.0643904	0.0405623	g__Asanoa
-0.0643702	0.0406253	g__Chondromyces
-0.0643681	0.0406319	g__Pseudosporangium
-0.0641761	0.0412362	g__Brevifollis
-0.0639475	0.0419656	g__Lewinella
-0.0639108	0.0420835	g__Roseimaritima
-0.0638508	0.0422773	g__Methylophilus
-0.0637783	0.0425124	g__Sphaerochaeta
-0.0635625	0.0432186	g__Sideroxydans
-0.0635332	0.0433152	g__Stackebrandtia
-0.0633089	0.0440609	g__Ferrimicrobium
-0.0632345	0.0443107	g__Proteiniphilum
-0.0631595	0.0445636	g__Acidisarcina
-0.063147	0.044606	g__Azovibrio
0.0629976	0.0451139	g__Rhizobacter
-0.0629835	0.0451621	g__Rhodoluna
-0.0628635	0.0455743	g__Methylovorus
-0.0627051	0.0461228	g__Desulfococcus
-0.0626184	0.0464252	g__Alkalilimnicola
-0.0623765	0.0472785	g__Algiphilus
-0.0622744	0.0476426	g__Xiangella
-0.0619383	0.0488572	g__Catelliglobosispora
-0.0619288	0.048892	g__Amphiplicatus
-0.06168	0.0498087	g__Marinactinospora

## Sheet: KIRP
r	p	name
-0.190263	0.000564003	g__Virgibacillus
0.168124	0.00235876	g__Trichophyton
-0.16665	0.00257951	g__Mycetocola
-0.15524	0.0050338	g__Pedobacter
-0.154844	0.00514786	g__Frankia
-0.154645	0.00520632	g__Paenarthrobacter
-0.153618	0.00551662	g__Cryptococcus
0.151853	0.00608904	g__Aspergillus
-0.148649	0.00726579	g__Mycobacterium
-0.147893	0.00757161	g__Dysgonomonas
-0.144158	0.00925613	g__Altererythrobacter
-0.135491	0.0145066	g__Brachybacterium
-0.135375	0.0145915	g__Bacillus
0.133056	0.0163887	g__Pyricularia
0.132856	0.0165524	g__Metarhizium
-0.130719	0.0183928	g__Pusillimonas
-0.129614	0.0194121	g__Cytophaga
-0.128218	0.0207709	g__Planctopirus
-0.126621	0.0224249	g__Roseateles
-0.125817	0.0232998	g__Thermomonas
-0.125418	0.0237447	g__Arcobacter
-0.12439	0.0249259	g__Bradyrhizobium
-0.122587	0.0271193	g__Leptospira
-0.121853	0.0280588	g__Dissoconium
-0.120984	0.0292074	k__Bacteria_p__Proteobacteria_c__Gammaproteobacteria_o__Xanthomonadales_f__Xanthomonadaceae_g__
-0.120475	0.029898	g__Shimwellia
-0.120124	0.0303827	g__Rubrivivax
-0.120009	0.0305427	g__Dialister
-0.119719	0.0309495	g__Ralstonia
0.119436	0.0313523	g__Blastomyces
-0.119432	0.0313575	g__Cyclobacterium
-0.119359	0.0314624	g__Marixanthomonas
-0.118516	0.0326888	g__Sclerotinia
-0.118455	0.0327795	g__Psychromicrobium
-0.118233	0.0331098	g__Anaerotignum
-0.118028	0.0334185	g__Ursidibacter
-0.117673	0.033957	g__Mesorhizobium
-0.117484	0.0342478	k__Bacteria_p__Firmicutes_c__Clostridia_o__Clostridiales_f__Ruminococcaceae_g__
-0.116535	0.0357347	g__Rhodomicrobium
-0.116138	0.0363739	g__Neobittarella
-0.115847	0.0368479	g__Weeksella
-0.11583	0.0368752	g__Nioella
-0.115814	0.0369011	g__Helcococcus
-0.115699	0.0370911	g__Meyerozyma
-0.115541	0.0373511	g__Parvimonas
-0.11546	0.037486	g__Paeniglutamicibacter
-0.114812	0.0385762	g__Sphingomonas
-0.114004	0.0399734	g__Algoriphagus
-0.113346	0.0411423	g__Desulfocarbo
-0.112806	0.0421237	g__Ensifer
-0.112663	0.0423878	g__Thauera
-0.112607	0.042491	g__Ascidiaceihabitans
-0.112607	0.042491	g__Budvicia
-0.112219	0.0432125	k__Bacteria_p__Proteobacteria_c__Gammaproteobacteria_o___f___g__
-0.112213	0.0432229	g__Pelagibacterium
-0.112101	0.0434334	g__Elizabethkingia
-0.111848	0.0439126	g__Hydrogenophaga
-0.111559	0.0444646	g__Caulobacter
0.111187	0.0451837	g__Diutina
-0.111068	0.045415	g__Sphingobacterium
-0.110633	0.046272	g__Luteipulveratus
-0.110336	0.0468642	g__Lachnoclostridium
-0.110264	0.0470093	g__Tannerella
-0.109682	0.0481925	g__Rhizobium
-0.109608	0.0483451	g__Intestinimonas

[truncated: 7 more sheets: LUAD, OV, PRAD, READ, STAD, THCA, UCEC]
