# Supplementary material for: Weighted gene coexpression network analysis and machine learning reveal oncogenome associated microbiome plays an important role in tumor immunity and prognosis in pan-cancer
Source: J Transl Med. 2023 Aug 12;21:537. doi: 10.1186/s12967-023-04411-0 (PMC10422781; doi:10.1186/s12967-023-04411-0)
Supplement: Supplementary file 9 — Additional file 9: Table S5. The correlation of tumor microbiome with TAM1 cells. TAM1: tumor-associated macrophages 1. [file 12967_2023_4411_MOESM9_ESM.xlsx]

## Sheet: BLCA
r	p	name
0.230503	4.83534e-08	g__Tissierella
0.108994	0.0106715	g__Blastococcus
-0.100076	0.0191164	g__Paenibacillus
0.098554	0.0210303	g__Devosia
-0.094636	0.0267404	g__Alcanivorax
0.0888758	0.0375351	g__Streptococcus
0.0882121	0.0389891	g__Lactobacillus
0.0865272	0.0428957	g__Meyerozyma

## Sheet: BRCA
r	p	name
-0.084081	0.00354556	g__Mucilaginibacter
-0.075335	0.00900772	g__Herpetosiphon
-0.0728864	0.0115158	g__Erysipelatoclostridium
-0.0721102	0.0124312	g__Absiella
-0.0719839	0.012586	g__Kitasatospora
-0.0716686	0.01298	g__Reyranella
-0.0692361	0.0164044	g__Nigerium
-0.0689478	0.0168587	g__Cloacibacterium
-0.0681918	0.0181028	g__Raineyella
-0.0664378	0.0213026	g__Pseudarthrobacter
-0.0661501	0.0218719	g__Meiothermus
-0.0661174	0.0219373	g__Nitrobacter
-0.0657684	0.0226475	g__Stomatobaculum
-0.0657275	0.022732	g__Centipeda
-0.0656238	0.0229476	g__Isachenkonia
-0.0655201	0.0231648	g__Niveispirillum
-0.0653733	0.0234755	g__Micrococcus
-0.065316	0.0235978	g__Propioniferax
-0.065001	0.0242795	g__Williamsia
-0.0649863	0.0243117	g__Azorhizobium
-0.0647988	0.0247261	g__Granulicoccus
-0.0647585	0.024816	g__Carideicomes
-0.0647547	0.0248247	g__Marmoricola
-0.0646559	0.025046	g__Marihabitans
-0.0643105	0.0258341	g__Knoellia
-0.0637907	0.0270605	g__Paraoceanicella
-0.0636795	0.0273292	g__Acetanaerobacterium
-0.0635538	0.0276357	g__Croceicoccus
-0.063269	0.0283413	g__Tepidiphilus
-0.0629564	0.0291337	g__Sphingorhabdus
-0.0626609	0.0298998	g__Orenia
-0.0624862	0.030361	g__Dialister
-0.0623855	0.0306296	g__Fusicatenibacter
-0.062288	0.0308916	g__Enhydrobacter
-0.062098	0.0314076	g__Trametes
-0.0619652	0.0317727	g__Muricauda
-0.0619413	0.0318388	g__Hespellia
-0.0618321	0.0321422	g__Mobiluncus
-0.0616802	0.0325682	g__Holdemanella
-0.0616343	0.0326982	g__Pediococcus
-0.0615972	0.0328032	g__Luteococcus
-0.0615188	0.0330264	g__Pseudokineococcus
-0.0612798	0.033715	g__Promicromonospora
-0.0612354	0.0338442	g__Hansschlegelia
-0.0610367	0.0344279	g__Lichenibacterium
-0.0607892	0.0351669	g__Undibacterium
-0.0607682	0.0352301	g__Roseburia
-0.0605687	0.0358365	g__Amnibacterium
-0.0604524	0.0361942	k__Bacteria_p__Proteobacteria_c__Gammaproteobacteria_o__Pasteurellales_f__Pasteurellaceae_g__
-0.0604072	0.0363338	g__Pseudoscardovia
-0.0604024	0.0363488	g__Rheinheimera
-0.0601831	0.0370339	g__Eggerthia
-0.0601273	0.03721	g__Intestinimonas
-0.0601267	0.0372116	g__Oceanibium
-0.0601056	0.0372786	g__Johnsonella
-0.060075	0.0373756	g__Coprobacter
-0.0600721	0.0373847	g__Pseudoalteromonas
-0.0600584	0.0374284	g__Akkermansia
-0.059921	0.0378668	g__Dakarella
-0.0597356	0.0384657	g__Rodentibacter
-0.0596171	0.0388528	g__Mogibacterium
-0.0595631	0.0390303	g__Mesosutterella
-0.05948	0.0393045	g__Citricoccus
-0.0594523	0.0393963	g__Dermacoccus
-0.0594144	0.0395224	g__Suicoccus
-0.0592087	0.0402117	g__Cellvibrio
-0.0590507	0.0407481	g__Olsenella
-0.0590045	0.0409062	g__Sulfuritortus
-0.0589747	0.0410085	g__Pseudomicrostroma
-0.0589666	0.0410361	g__Frisingicoccus
-0.0589666	0.0410361	g__Intestinibacter
-0.0589539	0.0410798	g__Chroococcidiopsis
-0.0589028	0.0412559	g__Eggerthella
-0.0588993	0.0412678	g__Rubrivivax
-0.0588388	0.0414772	g__Brevilactibacter
-0.0587437	0.041808	g__Richelia
-0.0587334	0.0418438	g__Cystobacter
-0.0587291	0.0418588	g__Neoactinobaculum
-0.0587027	0.041951	g__Naumannella
-0.0585836	0.0423697	g__Starkeya
-0.0585639	0.0424392	g__Glutamicibacter
-0.0585511	0.0424846	g__Salinarimonas
-0.0585268	0.0425706	g__Barrientosiimonas
0.0584918	0.0426948	g__Cyclobacterium
-0.0583563	0.0431784	g__Petrocella
-0.0583495	0.0432028	g__Defluviimonas
-0.058219	0.043673	g__Agrococcus
-0.0581748	0.0438334	g__Wolbachia
-0.0581173	0.0440424	g__Ottowia
-0.0580707	0.0442129	g__Porphyrobacter
-0.0579347	0.0447125	g__Nocardiopsis
-0.0579159	0.0447821	g__Zavarzinia
-0.0577959	0.0452277	g__Parascardovia
-0.0577381	0.0454438	g__Robbsia
-0.0576932	0.0456118	g__Winkia
-0.057681	0.0456579	g__Negativicoccus
-0.0576743	0.0456829	g__Azospirillum
-0.0575729	0.0460655	g__Pimelobacter
-0.057474	0.0464416	g__Actinomyces
-0.0573301	0.0469926	g__Labrys
-0.0572776	0.0471952	g__Ignatzschineria
-0.0571718	0.0476056	g__Phragmitibacter
-0.0571696	0.0476144	g__Sulfurivermis
-0.0571051	0.0478658	g__Ruania
-0.057059	0.0480465	g__Ureaplasma
-0.0570156	0.0482171	g__Victivallis
-0.0570001	0.048278	g__Oscillatoria
-0.0569747	0.048378	g__Propionimicrobium
-0.0569373	0.0485259	g__Paenirhodobacter
-0.0569263	0.0485694	g__Kingella
-0.0569103	0.048633	g__Faecalimonas
-0.0569005	0.0486719	g__Lachnospira
-0.0567617	0.0492248	g__Angelakisella
-0.0566506	0.0496712	g__Ellagibacter
-0.0566408	0.049711	k__Bacteria_p__Actinobacteria_c__Actinobacteria_o__Actinomycetales_f__Actinomycetaceae_g__
-0.0566361	0.0497299	g__Peptoanaerobacter
-0.0566222	0.0497859	g__Inquilinus

## Sheet: CESC
r	p	name
-0.153466	0.00304102	g__Riemerella
-0.153323	0.00306881	g__Podospora
-0.144676	0.0052389	g__Verticillium
-0.142664	0.00591015	g__Lutibacter
-0.139557	0.00709884	g__Melampsora
-0.139507	0.00711972	g__Spiroplasma
-0.137319	0.0080829	g__Pochonia
-0.12536	0.0156924	g__Thermosediminibacter
-0.119781	0.0210169	g__Fonsecaea
-0.119097	0.0217679	g__Synchytrium
-0.118276	0.0226983	g__Sphaerulina
-0.116524	0.024801	g__Marssonina
-0.113366	0.029017	g__Scedosporium
-0.112363	0.0304783	g__Sodiomyces
-0.110043	0.0341014	g__Algibacter
-0.106535	0.0402752	g__Pseudoalteromonas
-0.104133	0.045025	g__Megasphaera

## Sheet: COAD
r	p	name
-0.157407	0.00144413	g__Lentzea
-0.149805	0.00244541	g__Amorphotheca
-0.142466	0.0039767	g__Mangrovicoccus
-0.136276	0.00589309	g__Actinomyces
-0.134449	0.00659963	g__Paenibacillus
-0.133099	0.00716906	g__Metasolibacillus
-0.132769	0.00731482	g__Apibacter
-0.130563	0.00835943	g__Pseudogymnoascus
-0.130551	0.00836533	g__Amniculibacterium
-0.13051	0.00838572	g__Pestalotiopsis
-0.129727	0.00878843	g__Catenibacterium
-0.129641	0.00883381	g__Mariniphaga
-0.126452	0.0106648	g__Trueperella
-0.126431	0.0106782	g__Ancrocorticia
-0.125797	0.0110802	g__Chitinophaga
-0.125039	0.0115787	g__Paludifilum
-0.124622	0.0118612	g__Idiomarina
-0.124495	0.011949	g__Ruminiclostridium
-0.12397	0.0123159	k__Bacteria_p__Actinobacteria_c__Actinobacteria_o__Actinomycetales_f__Actinomycetaceae_g__
-0.123088	0.0129543	g__Acholeplasma
-0.122756	0.0132022	g__Parvibacter
-0.122258	0.0135814	g__Aeribacillus
-0.121896	0.0138637	g__Beduini
-0.121885	0.0138725	g__Arcobacter
-0.12171	0.0140105	g__Brevundimonas
-0.120823	0.0147298	g__Brevifollis
-0.120599	0.0149163	g__Morococcus
-0.119591	0.0157823	g__Limnospira
-0.118809	0.0164849	g__Oxalobacter
-0.118183	0.0170656	g__Propionibacterium
-0.117816	0.0174152	g__Deinococcus
-0.117423	0.0177956	g__Ignatzschineria
-0.117414	0.0178049	k__Bacteria_p__Proteobacteria_c__Gammaproteobacteria_o___f___g__
-0.116925	0.0182893	g__Spathaspora
-0.116503	0.0187164	g__Kaistia
-0.116185	0.0190429	k__Bacteria_p__Firmicutes_c___o___f___g__
-0.11614	0.0190902	g__Thiobacillus
-0.116038	0.0191967	g__Anaerovirgula
-0.115982	0.0192553	g__Enorma
-0.115597	0.0196623	g__Diplodia
-0.115046	0.020258	g__Modestobacter
-0.114221	0.0211787	g__Winogradskyella
-0.11388	0.0215701	g__Phragmitibacter
-0.113626	0.0218658	g__Lawsonia
-0.113252	0.0223073	g__Verrucomicrobium
-0.113242	0.0223188	g__Rothia
-0.112978	0.0226348	g__Mycobacterium
-0.11295	0.0226688	g__Petrocella
-0.112936	0.0226857	g__Novibacillus
-0.112678	0.0229988	g__Brevirhabdus
-0.112477	0.0232467	g__Phaeodactylibacter
-0.112146	0.0236576	g__Zasmidium
-0.112043	0.023787	g__Campylobacter
-0.11204	0.0237907	g__Pauljensenia
-0.11169	0.0242348	g__Maribacter
-0.109957	0.0265413	g__Mobilisporobacter
-0.109766	0.0268068	g__Tibeticola
-0.109748	0.0268317	g__Lutispora
-0.109095	0.0277567	g__Hymenobacter
-0.10808	0.0292486	g__Pseudobacteroides
-0.107581	0.0300074	g__Bradyrhizobium
-0.107295	0.0304503	g__Marssonina
-0.106975	0.0309513	g__Rubrobacter
-0.106906	0.0310602	k__Bacteria_p__Actinobacteria_c__Coriobacteriia_o__Coriobacteriales_f__Coriobacteriaceae_g__
-0.106695	0.0313965	g__Acetitomaculum
-0.106347	0.0319555	g__Thermophagus
-0.106339	0.0319696	g__Anaerobiospirillum
-0.106328	0.0319878	g__Anaerocolumna
-0.106214	0.032173	g__Coriobacterium
-0.106004	0.0325176	g__Mobiluncus
-0.105452	0.0334372	g__Acetanaerobacterium
-0.105388	0.0335448	g__Puteibacter
-0.105256	0.0337679	k__Bacteria_p__Firmicutes_c__Negativicutes_o__Veillonellales_f__Veillonellaceae_g__
-0.104811	0.034532	g__Phoenicibacter
-0.104623	0.0348587	g__Pedobacter
-0.104275	0.0354708	g__Mobilibacterium
-0.103764	0.0363873	g__Bosea
-0.103714	0.036478	g__Agaricus
-0.103425	0.0370056	g__Amphibacillus
-0.103052	0.0376975	g__Vallitalea
-0.102911	0.0379602	g__Denitrobacterium
-0.102499	0.038741	g__Corticimicrobacter
-0.102238	0.0392427	g__Catellatospora
-0.10195	0.0398025	g__Pseudoalteromonas
-0.101871	0.0399562	g__Rubritalea
-0.101722	0.0402495	g__Saccharomyces
-0.101265	0.04116	g__Galactobacillus
-0.101095	0.0415034	g__Labedella
-0.100722	0.0422653	g__Proteiniclasticum
-0.100711	0.0422875	g__Actinotalea
-0.100429	0.0428713	g__Jaminaea
-0.100363	0.0430082	g__Longibaculum
-0.100099	0.0435609	g__Kitasatospora
-0.0998181	0.0441578	g__Dubosiella
-0.0996902	0.0444314	g__Longicatena
-0.09945	0.0449491	g__Polaribacter
-0.0990425	0.0458389	g__Marinifilum
-0.099023	0.0458819	g__Blastomonas
-0.0989546	0.0460328	g__Roseimicrobium
-0.0988406	0.0462853	g__Nannizzia

## Sheet: ESCA
r	p	name
0.21991	0.00185192	g__Tetrasphaera
0.204941	0.00377555	g__Elizabethkingia
0.202359	0.00424898	g__Salegentibacter
0.200162	0.00469325	g__Soonwooa
-0.185082	0.00904255	g__Phocoenobacter
-0.183966	0.00947491	g__Caenimonas
-0.179105	0.0115792	g__Gallibacterium
0.178493	0.0118709	g__Rudanella
0.177956	0.0121329	g__Lutibacter
-0.176289	0.0129777	g__Succinimonas
0.176186	0.0130314	g__Gulbenkiania
0.175769	0.0132513	g__Terrimonas
-0.174318	0.0140425	g__Morganella
-0.173184	0.0146894	k__Bacteria_p__Proteobacteria_c__Gammaproteobacteria_o__Cellvibrionales_f__Porticoccaceae_g__
-0.172767	0.0149336	k__Bacteria_p__Firmicutes_c__Bacilli_o__Bacillales_f___g__
-0.171895	0.015456	g__Limnobaculum
-0.170886	0.0160804	g__Methylocapsa
-0.170544	0.0162966	g__Kineobactrum
-0.168707	0.017504	g__Colwellia
0.16653	0.0190353	g__Tropheryma
0.166484	0.0190686	g__Bacteriovorax
-0.165942	0.019468	g__Chania
0.165526	0.019779	k__Bacteria_p__Proteobacteria_c__Gammaproteobacteria_o__Xanthomonadales_f__Xanthomonadaceae_g__
-0.165263	0.0199781	g__Pragia
0.162543	0.0221409	g__Pseudoglutamicibacter
-0.159831	0.0244956	g__Natronospirillum
0.159488	0.0248084	g__Phyllobacterium
0.158888	0.0253638	g__Ilumatobacter
0.158387	0.0258356	g__Pseudarcicella
0.158238	0.0259768	g__Paraflavitalea
-0.157655	0.0265375	g__Labilithrix
0.156876	0.0273041	g__Kaistia
0.154721	0.0295209	g__Dysgonomonas
0.154697	0.0295469	g__Sediminibacterium
-0.153764	0.0305542	g__Immundisolibacter
0.153544	0.0307964	g__Calidifontibacter
0.153207	0.0311698	g__Caproiciproducens
0.153134	0.0312511	g__Amniculibacterium
0.152375	0.0321086	g__Pedosphaera
-0.152356	0.0321301	g__Photorhabdus
0.151363	0.0332818	g__Planomonospora
-0.150198	0.0346792	g__Gallaecimonas
-0.150086	0.0348163	g__Providencia
-0.14969	0.0353035	g__Methylomarinum
0.149051	0.0361022	g__Actinomycetospora
-0.148934	0.0362497	g__Motiliproteus
-0.148856	0.0363484	g__Bosea
0.148387	0.0369477	g__Roseivirga
-0.148212	0.0371747	g__Trichoderma
0.147644	0.0379146	g__Rhodovarius
-0.147571	0.0380108	g__Salinivibrio
-0.147146	0.0385756	g__Marinitoga
0.147092	0.0386468	g__Psychroflexus
0.147038	0.0387191	g__Marivirga
-0.14663	0.0392683	g__Lysobacter
0.146211	0.0398399	g__Confluentibacter
0.146037	0.0400794	g__Ornithinicoccus
0.145677	0.040578	g__Flexilinea
-0.144736	0.041907	g__Edwardsiella
-0.144497	0.0422492	g__Budvicia
-0.144491	0.0422578	g__Dichelobacter
-0.144347	0.0424666	g__Terasakiispira
-0.144221	0.0426487	g__Acidihalobacter
0.144084	0.0428491	g__Deminuibacter
-0.143823	0.043231	g__Photobacterium
0.14312	0.0442727	g__Malassezia
0.142743	0.0448418	g__Blattabacterium
0.142673	0.0449471	g__Spirosoma
0.142665	0.0449592	g__Marinoscillum
-0.142073	0.0458656	g__Frischella
0.141776	0.0463259	g__Proteiniphilum
0.141334	0.0470176	g__Eisenibacter
-0.140982	0.0475754	g__Limnohabitans
0.140406	0.0485004	g__Filimonas
0.140405	0.0485021	g__Chryseobacterium
0.139862	0.0493857	g__Eremococcus

## Sheet: GBM
r	p	name
-0.239125	0.00114982	g__Thioflexothrix
-0.228793	0.00189231	g__Aquidulcibacter
-0.219489	0.00291027	g__Zobellia
-0.209672	0.00450017	g__Brevibacterium
-0.189376	0.0104543	g__Atopobium
-0.188397	0.0108668	g__Rhodomicrobium
-0.184376	0.0127159	g__Crocosphaera
0.184214	0.0127958	g__Cupriavidus
-0.183583	0.0131113	g__Corallococcus
-0.174978	0.0181483	g__Psychrobacillus
-0.173794	0.0189588	g__Bifidobacterium
-0.173681	0.0190379	g__Algoriphagus
-0.1703	0.021536	g__Nocardia
-0.157451	0.0337742	g__Aphanothece
-0.157025	0.0342647	g__Winkia
-0.155403	0.0361884	g__Oceanibium
-0.154902	0.0368016	g__Mobilicoccus
-0.152826	0.039432	g__Paeniglutamicibacter
-0.1526	0.0397276	g__Alcanivorax
-0.152452	0.0399225	g__Fodinicola
-0.149552	0.0439035	g__Melissococcus
-0.149212	0.0443913	g__Methylocapsa
-0.148886	0.0448633	g__Methylocystis
-0.147405	0.0470595	g__Yimella
-0.147091	0.0475375	g__Meiothermus

## Sheet: HNSC
r	p	name
0.279689	0.000286706	g__Granulicatella
0.246172	0.00148565	g__Stomatobaculum
-0.21352	0.00604737	g__Vagococcus
0.205928	0.00815914	k__Bacteria_p__Actinobacteria_c__Actinobacteria_o__Actinomycetales_f__Actinomycetaceae_g__
-0.199362	0.0104885	g__Hathewaya
-0.197384	0.0112965	g__Gottschalkia
0.188991	0.0153658	g__Lactonifactor
0.182622	0.0192565	g__Colletotrichum
0.165304	0.0344035	g__Eikenella
-0.159298	0.0416069	g__Garciella
0.154435	0.0483279	g__Pauljensenia

## Sheet: KICH
r	p	name
0.267082	0.00407101	g__Tatumella
0.245807	0.00838513	g__Pusillimonas
0.240785	0.00986198	g__Halothiobacillus
0.240756	0.00987097	g__Methylococcus
0.225991	0.0156191	g__Tessaracoccus
0.223809	0.0166776	g__Phaeospirillum
0.220281	0.0185206	g__Thiolinea
0.216857	0.0204747	g__Photorhabdus
0.212812	0.0230097	g__Lonsdalea
0.212121	0.0234683	g__Saccharomyces
0.209197	0.0254979	g__Chania
0.205299	0.0284349	g__Fonsecaea
0.202235	0.0309413	g__Desulfocarbo
0.19994	0.0329385	g__Thermomonospora
0.19919	0.0336144	g__Sporisorium
0.198906	0.0338729	g__Algoriphagus
0.198163	0.0345592	g__Carnobacterium
0.194446	0.0381661	g__Nakamurella
0.194358	0.0382549	g__Leminorella
0.192981	0.0396719	g__Wickerhamomyces
0.190946	0.0418472	k__Bacteria_p__Proteobacteria_c__Gammaproteobacteria_o__Enterobacterales_f__Hafniaceae_g__
0.188565	0.0445162	g__Arsenophonus
0.188219	0.0449153	g__Brachybacterium
0.18727	0.0460261	g__Plesiomonas
0.187005	0.0463408	g__Cyberlindnera
0.184317	0.0496309	g__Serratia
0.184298	0.0496546	g__Yersinia
0.184114	0.0498864	g__Izhakiella

## Sheet: KIRC
r	p	name
-0.0716201	0.0226976	g__Orrella
-0.0711532	0.0235991	g__Saccharothrix
-0.0703776	0.0251652	g__Mycolicibacter
-0.0684065	0.0295549	g__Actinosynnema
-0.0680879	0.030323	g__Prauserella
-0.0662373	0.0351309	g__Pseudofulvimonas
-0.0644215	0.0404651	g__Kitasatospora
-0.0625155	0.0467866	g__Actinokineospora
-0.0618026	0.0493553	g__Glycomyces

## Sheet: KIRP
r	p	name
-0.211528	0.00012191	g__Pedobacter
0.159985	0.00383147	g__Pyricularia
-0.159312	0.0039845	g__Colwellia
0.155005	0.00510125	g__Aspergillus
-0.150972	0.00639433	g__Alcanivorax
-0.14951	0.00693104	g__Ralstonia
-0.147281	0.00782731	g__Roseomonas
0.1468	0.00803355	g__Metarhizium
-0.136573	0.0137331	g__Methylobacterium
-0.135519	0.0144863	g__Chania
-0.134875	0.0149639	g__Enterococcus
-0.1338	0.0157926	g__Verminephrobacter
-0.132858	0.0165507	g__Mycetocola
-0.13272	0.0166648	g__Orrella
-0.129599	0.0194266	g__Pseudoalteromonas
-0.129546	0.0194772	g__Parascardovia
-0.125729	0.0233971	g__Sodiomyces
-0.12502	0.0241963	g__Tepidiphilus
-0.12379	0.0256385	g__Diaphorobacter
-0.122768	0.0268919	g__Debaryomyces
-0.122331	0.0274436	g__Crocosphaera
-0.121921	0.0279705	g__Falsochrobactrum
-0.120754	0.0295172	g__Rhizobacter
-0.119997	0.0305599	g__Olsenella
-0.119713	0.0309588	g__Phascolarctobacterium
-0.119216	0.0316677	g__Elizabethkingia
-0.118819	0.0322437	g__Mesorhizobium
-0.117774	0.0338031	g__Propioniferax
-0.117367	0.0344272	g__Pyramidobacter
-0.117358	0.0344413	g__Spathaspora
-0.116608	0.0356192	g__Methylomicrobium
-0.116601	0.035629	g__Porphyromonas
-0.116555	0.0357028	g__Pseudogemmobacter
-0.116264	0.0361693	g__Sphaerulina
-0.115503	0.0374149	g__Desulfocarbo
-0.114658	0.0388401	g__Pandoraea
-0.114066	0.0398647	g__Megasphaera
-0.113025	0.0417243	g__Fenollaria
-0.112965	0.0418327	g__Hydrogenophaga
-0.11265	0.0424114	g__Alistipes
-0.111831	0.0439451	g__Aureobasidium
-0.111795	0.0440137	g__Acetivibrio
-0.111785	0.0440325	g__Arcobacter
-0.111777	0.0440468	g__Nioella
-0.111758	0.0440842	g__Oscillatoria
-0.111357	0.0448537	g__Modestobacter
-0.111357	0.0448537	g__Paraprevotella
-0.111357	0.0448537	g__Prevotellamassilia
-0.111357	0.0448537	g__Conchiformibius
-0.111118	0.0453176	g__Phialemoniopsis
-0.110843	0.0458578	g__Simplicispira
-0.110743	0.0460544	g__Pseudorhodoferax
-0.110727	0.0460866	g__Paeniglutamicibacter
-0.110493	0.046551	g__Aphanothece
-0.109944	0.0476563	g__Dyella
-0.109873	0.0478009	k__Bacteria_p__Proteobacteria_c__Epsilonproteobacteria_o__Campylobacterales_f__Campylobacteraceae_g__
-0.109756	0.0480411	g__Cytophaga
-0.109643	0.0482733	g__Planctopirus
-0.109277	0.0490307	g__Lodderomyces

[truncated: 7 more sheets: LUAD, OV, PRAD, READ, STAD, THCA, UCEC]
