# Supplementary material for: Weighted gene coexpression network analysis and machine learning reveal oncogenome associated microbiome plays an important role in tumor immunity and prognosis in pan-cancer
Source: J Transl Med. 2023 Aug 12;21:537. doi: 10.1186/s12967-023-04411-0 (PMC10422781; doi:10.1186/s12967-023-04411-0)
Supplement: Supplementary file 10 — Additional file 10: Table S6. Univariate Cox analysis of the tumor microbiome. [file 12967_2023_4411_MOESM10_ESM.xlsx]

## Sheet: BLCA
characteristics	Hazard.Ratio	CI95	P.Value
g__Neoactinobaculum	0	0-21.38	0.189
g__Gardnerella	0.35	0.09-1.34	0.127
g__Scardovia	0.02	0-3.23	0.127
g__Catenulispora	2.78	0.68-11.34	0.155
g__Mycolicibacter	2.08	1-4.32	0.05
g__Rhodococcus	1.21	1-1.46	0.053
g__Frankia	0.92	0.83-1.03	0.149
g__Blastococcus	1.3	1.03-1.65	0.029
g__Lapillicoccus	3.02	0.72-12.64	0.131
g__Serinicoccus	1.41	1.16-1.72	0.001
g__Cryobacterium	2.71	0.7-10.57	0.15
g__Paenarthrobacter	0.91	0.79-1.04	0.165
g__Sinomonas	3.79	0.83-17.32	0.085
g__Jishengella	1.31	1.01-1.7	0.04
g__Aeromicrobium	0	0-842.75	0.176
g__Streptacidiphilus	1.34	0.87-2.08	0.184
g__Olsenella	0.2	0.03-1.55	0.124
g__Parolsenella	0	0-0.32	0.04
k__Bacteria_p__Actinobacteria_c__Coriobacteriia_o__Coriobacteriales_f__Coriobacteriaceae_g__	0	0-16.81	0.06
g__Senegalimassilia	0	0-1.1	0.053
g__Slackia	0.19	0.05-0.71	0.013
g__Rhodothermus	10.76	3.89-29.79	0
k__Bacteria_p__Bacteroidetes_c__Bacteroidia_o__Bacteroidales_f___g__	0.02	0-1.08	0.055
g__Bacteroides	0.8	0.66-0.98	0.034
g__Barnesiella	0.23	0.06-0.87	0.03
g__Coprobacter	0.05	0-1.22	0.066
g__Duncaniella	0.01	0-0.83	0.042
g__Porphyromonas	0.7	0.48-1.02	0.065
g__Alloprevotella	0.67	0.42-1.08	0.099
g__Paraprevotella	0.11	0.01-0.87	0.036
g__Prevotella	0.88	0.75-1.04	0.138
g__Alistipes	0.55	0.29-1.03	0.06
g__Parabacteroides	0.39	0.23-0.65	0
g__Tannerella	0.37	0.13-1.05	0.062
g__Natronoflexus	11.52	3.21-41.3	0
g__Paracnuella	1.31	1.03-1.67	0.029
g__Taibaiella	3.75	1.34-10.5	0.012
g__Cecembia	0	0-132037.82	0.11
g__Spirosoma	6.25	1.4-27.93	0.016
g__Pedobacter	0.91	0.78-1.05	0.192
g__Litorilinea	1.75	1.14-2.67	0.01
g__Crocosphaera	1.07	0.97-1.18	0.182
g__Fortiea	1.32	0.89-1.94	0.168
g__Tolypothrix	0	0-1.3	0.058
g__Coleofasciculus	0	0-363933725061540	0.162
g__Cyanobium	1.27	0.98-1.64	0.066
g__Deinococcus	1.21	0.98-1.49	0.081
g__Gemella	0.57	0.37-0.86	0.008
g__Anaerobacillus	0	0-1457835408594263296	0.194
g__Bacillus	0.9	0.82-1	0.045
g__Massilibacterium	0	0-361.83	0.077
g__Ornithinibacillus	0	0-6.84	0.059
g__Aneurinibacillus	0	0-65498.73	0.098
k__Bacteria_p__Firmicutes_c__Bacilli_o__Bacillales_f__Sporolactobacillaceae_g__	0	0-991729809165633	0.147
g__Scopulibacillus	0	0-4758434022410774	0.154
k__Bacteria_p__Firmicutes_c__Bacilli_o__Lactobacillales_f___g__	0.01	0-0.66	0.032
g__Abiotrophia	0.43	0.12-1.5	0.187
g__Atopostipes	0.1	0-2.41	0.157
g__Vagococcus	0.5	0.18-1.44	0.199
g__Streptococcus	0.87	0.74-1.03	0.106
g__Massilistercora	0.01	0-0.9	0.045
g__Butyricicoccus	0	0-0.74	0.038
g__Hungatella	0.19	0.04-0.88	0.034
g__Lactonifactor	0.01	0-0.82	0.04
g__Massilioclostridium	0.01	0-0.75	0.038
k__Bacteria_p__Firmicutes_c__Clostridia_o__Clostridiales_f__Clostridiales.Family.XIII..Incertae.Sedis_g__	0.39	0.2-0.73	0.004
g__Emergencia	0.05	0-0.59	0.018
g__Mogibacterium	0.61	0.3-1.25	0.18
g__Eubacterium	1.33	0.98-1.82	0.07
g__Mageeibacillus	0.24	0.03-2.08	0.196
g__Anaerostipes	0.21	0.06-0.74	0.016
g__Anaerotignum	0.33	0.11-1	0.049
g__Coprococcus	0.3	0.11-0.79	0.015
g__Eisenbergiella	0.34	0.1-1.13	0.078
g__Enterocloster	0.59	0.33-1.07	0.08
g__Faecalicatena	0.04	0-0.54	0.016
g__Fusicatenibacter	0.15	0.03-0.79	0.025
g__Johnsonella	0.32	0.12-0.86	0.024
g__Lachnoanaerobaculum	0.53	0.32-0.87	0.013
g__Lachnobacterium	0	0-0.96	0.049
g__Lachnoclostridium	0.09	0.02-0.52	0.007
g__Lachnospira	0.06	0-0.86	0.038
g__Mediterraneibacter	0.58	0.27-1.25	0.164
g__Oribacterium	0.5	0.24-1.01	0.055
g__Roseburia	0.21	0.05-0.8	0.023
g__Stomatobaculum	0.26	0.09-0.79	0.017
g__Tyzzerella	0.27	0.05-1.56	0.145
k__Bacteria_p__Firmicutes_c__Clostridia_o__Clostridiales_f__Oscillospiraceae_g__	0.12	0.03-0.56	0.007
g__Desulfonispora	0	0-0.17	0.044
g__Desulfotomaculum	0	0-1.12	0.051
g__Peptostreptococcus	0.34	0.14-0.82	0.017
g__Anaerotruncus	0	0-1.27	0.057
g__Angelakisella	0.03	0-0.79	0.036
g__Massilimaliae	0.01	0-0.84	0.042
g__Syntrophomonas	0	0-10206.88	0.078
g__Absiella	0.08	0.01-1.23	0.07
g__Bulleidia	0.33	0.08-1.29	0.111
g__Coprobacillus	0	0-1.16	0.056
g__Dielma	0	0-0.37	0.027
g__Eggerthia	0.33	0.12-0.95	0.039
g__Erysipelatoclostridium	0.62	0.32-1.19	0.153
g__Intestinibaculum	0	0-0.37	0.038
g__Lactimicrobium	0	0-1.01	0.05
g__Longibaculum	0	0-2.19	0.059
g__Massilimicrobiota	0	0-0.51	0.043
g__Solobacterium	0.62	0.36-1.06	0.078
g__Phascolarctobacterium	0.03	0-0.67	0.027
g__Veillonella	0.78	0.59-1.03	0.075
k__Bacteria_p__Firmicutes_c__Tissierellia_o___f___g__	0.51	0.21-1.2	0.122
g__Finegoldia	0.8	0.59-1.08	0.149
g__Parvimonas	0.45	0.27-0.74	0.002
g__Tissierella	0.95	0.91-0.99	0.014
g__Fusobacterium	0.64	0.5-0.83	0.001
g__Leptotrichia	0.53	0.32-0.88	0.014
g__Sneathia	0.15	0.02-1.14	0.067
g__Planctopirus	0.92	0.84-1	0.064
g__Devosia	1.4	1.11-1.77	0.004
g__Hoeflea	1.34	0.99-1.83	0.061
g__Pelagivirga	0.9	0.8-1.02	0.088
g__Reyranella	0.11	0.01-1.59	0.105
g__Dankookia	1.41	1.12-1.77	0.003
g__Paracraurococcus	1.34	1.02-1.75	0.033
g__Ferruginivarius	1.45	1.14-1.84	0.003
g__Blastomonas	0.43	0.18-1.05	0.064
g__Oligella	0	0-0.3	0.022
g__Alicycliphilus	1.4	0.89-2.2	0.144
g__Simplicispira	0.36	0.14-0.89	0.027
g__Janthinobacterium	2.01	0.85-4.75	0.112
g__Eikenella	0.24	0.06-0.89	0.033
g__Morococcus	0.47	0.22-1	0.049
g__Azonexus	0.06	0-1.04	0.053
g__Sulfurovum	0	0-461.91	0.076
k__Bacteria_p__Proteobacteria_c__Epsilonproteobacteria_o__Campylobacterales_f__Campylobacteraceae_g__	0.2	0.05-0.88	0.032
g__Halarcobacter	0	0-1.72	0.06
k__Bacteria_p__Proteobacteria_c__Gammaproteobacteria_o___f___g__	1.39	1.07-1.81	0.014
g__Ferrimonas	0	0-580.42	0.072
g__Pseudoalteromonas	1.21	0.94-1.57	0.142
g__Chromatocurvus	1.55	1.16-2.05	0.003
g__Microbulbifer	11.3	3.11-41.09	0
g__Sulfurivermis	0	0-262.61	0.151
g__Leclercia	0.2	0.03-1.2	0.079
g__Moellerella	3.57	0.73-17.35	0.115
g__Vibrio	1.15	0.99-1.34	0.07
g__Akkermansia	0.06	0-0.72	0.027
g__Phragmitibacter	1.58	1.18-2.1	0.002
g__Pseudovirgaria	1.44	1.13-1.84	0.003
g__Alternaria	1.34	1.02-1.76	0.037
g__Cladophialophora	1.21	0.94-1.55	0.142
g__Nannizzia	6.48	2.54-16.56	0
g__Debaryomyces	0	0-1.5	0.063
g__Metschnikowia	0.67	0.42-1.06	0.088
g__Kazachstania	0	0-0.03	0.029
g__Naumovozyma	0	0-1.38	0.053
g__Colletotrichum	1.06	0.99-1.14	0.088
g__Verticillium	1.22	0.98-1.54	0.081
g__Pochonia	1.33	1.09-1.64	0.006
g__Chaetomium	1.15	1.01-1.32	0.04
g__Thermothelomyces	1.06	0.98-1.15	0.147
g__Phialemoniopsis	1.12	0.96-1.3	0.145
g__Pestalotiopsis	4.34	1.09-17.33	0.038
g__Xylona	1.17	0.98-1.4	0.081
g__Serpula	2.15	1.33-3.46	0.002
g__Tilletiaria	1.78	0.97-3.29	0.064
g__Cryptococcus	1.49	1.07-2.08	0.018
g__Kwoniella	1.35	1.03-1.77	0.03
g__Cutaneotrichosporon	1.47	1.1-1.96	0.009

## Sheet: BRCA
characteristics	Hazard.Ratio	CI95	P.Value
k__Bacteria_p__Actinobacteria_c__Actinobacteria_o__Actinomycetales_f__Actinomycetaceae_g__	3.17	0.8-12.59	0.101
g__Flaviflexus	30925.5	28.29-33802944.57	0.004
g__Neoactinobaculum	32.77	1.84-584.72	0.018
g__Pauljensenia	3.34	1.46-7.68	0.004
g__Parascardovia	6.39	0.94-43.23	0.057
g__Mycobacteroides	2.04	0.7-5.92	0.189
g__Williamsia	5.78	1.46-22.86	0.012
g__Brevibacterium	2.44	1.6-3.73	0
g__Dermabacter	2.23	0.7-7.18	0.177
g__Devriesea	6.3937e+06	6648.23-6148917633.21	0
g__Dermacoccus	2.06	0.93-4.57	0.077
g__Kribbia	10.4	0.47-228.73	0.137
g__Phycicoccus	0.4	0.11-1.52	0.178
g__Agrococcus	9.15	1.28-65.55	0.027
g__Frondihabitans	7.40795e+06	7352.77-7463550688.29	0
g__Glaciihabitans	0	0-53482580487188	0.119
g__Mycetocola	8.96593e+06	10261.43-7833995672.64	0
g__Micrococcus	1.65	1.13-2.4	0.009
g__Paeniglutamicibacter	1.16	1.05-1.27	0.003
g__Pseudoglutamicibacter	3.03	1.3-7.06	0.01
g__Rothia	1.26	0.9-1.76	0.174
g__Micropruina	0	0-523286581277.93	0.08
g__Nocardioides	0.34	0.1-1.12	0.076
g__Pimelobacter	7.51417e+06	5406.79-10442927131	0
g__Auraticoccus	6.34883e+06	5552.81-7258962014.72	0
g__Granulicoccus	928.11	1.16-743938.3	0.045
g__Microlunatus	4300.28	63.72-290197.15	0
g__Naumannella	26870.7	24.22-29806492.47	0.004
g__Propionimicrobium	4.04	1.87-8.7	0
g__Raineyella	909.88	1-830397.26	0.05
g__Allokutzneria	0	0-395583975409.12	0.075
g__Kibdelosporangium	0	0-2.4690613226861e+20	0.096
g__Kitasatospora	24.61	3.97-152.48	0.001
g__Desertiactinospora	0.29	0.05-1.7	0.171
g__Microbispora	0	0-1.03399142849123e+27	0.17
g__Streptosporangium	2.97	0.92-9.52	0.068
g__Olsenella	5.33	0.9-31.49	0.065
g__Collinsella	2.95	0.95-9.2	0.062
g__Slackia	32.56	1.48-716.69	0.027
k__Bacteria_p__Bacteroidetes_c__Bacteroidia_o__Bacteroidales_f__Prevotellaceae_g__	0.48	0.16-1.42	0.186
g__Rikenella	13.29	0.44-404.48	0.138
g__Tannerella	0.37	0.11-1.31	0.122
g__Labilibaculum	292904	367.92-233182093.61	0
g__Algoriphagus	1.14	1.03-1.27	0.013
g__Aquirufa	0.01	0-5.34	0.154
g__Hymenobacter	1.52	0.96-2.4	0.076
g__Flavobacterium	1.52	0.9-2.58	0.119
g__Lutibacter	2.76	1.04-7.32	0.042
g__Riemerella	2.93	1.17-7.34	0.022
g__Tenacibaculum	4.87	0.68-34.72	0.114
g__Arcticibacter	0	0-82509710321.73	0.093
g__Oscillochloris	0	0-6.6614039251489e+27	0.143
g__Herpetosiphon	14.03	1.56-126.28	0.018
g__Crocosphaera	1.13	1.03-1.24	0.011
g__Nodularia	60.72	0.45-8176.47	0.101
g__Sphaerospermopsis	0	0-2.91603916893421e+23	0.125
g__Scytonema	0	0-161744.76	0.083
g__Tychonema	5299.96	49.8-564102.21	0
g__Oscillatoria	66.45	0.5-8771.21	0.092
g__Cyanobium	3.76	0.56-25.18	0.173
g__Deinococcus	1.54	0.92-2.56	0.1
g__Tumebacillus	0.12	0.03-0.53	0.005
g__Virgibacillus	1.26	1.03-1.55	0.025
g__Kurthia	0.62	0.3-1.27	0.187
g__Metasolibacillus	1.6	0.9-2.84	0.107
g__Planococcus	0	0-1176793065680.06	0.126
g__Abyssicoccus	3.32	1.52-7.25	0.003
g__Auricoccus	3.56	1.59-7.95	0.002
g__Jeotgalicoccus	2.71	0.97-7.63	0.058
g__Alloiococcus	2.26	1.61-3.18	0
g__Trichococcus	11.71	3.93-34.9	0
k__Bacteria_p__Firmicutes_c__Bacilli_o__Lactobacillales_f__Streptococcaceae_g__	2.38	0.92-6.19	0.075
k__Bacteria_p__Firmicutes_c__Clostridia_o__Clostridiales_f___g__	4.89	0.78-30.48	0.089
g__Pseudoramibacter	1.56	0.83-2.91	0.164
g__Fastidiosipila	6.21	1.76-21.96	0.005
g__Anaerobium	869.88	7.9-95797.07	0.005
g__Lachnospira	5	0.55-45.27	0.152
g__Stomatobaculum	6.26	0.79-49.25	0.082
g__Criibacterium	2.2	1.15-4.21	0.017
g__Peptoanaerobacter	49.4	0.47-5225.8	0.101
g__Acetanaerobacterium	4.06	0.55-30.08	0.17
g__Provencibacterium	2734.13	1.08-6905750.49	0.048
g__Pseudoruminoccoccus	0.14	0.01-1.71	0.124
g__Petrocella	1064.88	3.8-298209.85	0.015
g__Phascolarctobacterium	1.47	1.03-2.1	0.032
g__Veillonella	1.67	1.11-2.51	0.015
g__Ezakiella	5.36	1.04-27.51	0.044
g__Streptobacillus	0.22	0.06-0.83	0.026
g__Rhodopirellula	84.4	3.52-2022.14	0.006
g__Asticcacaulis	97.6	0.43-22274.46	0.098
g__Afipia	0.64	0.34-1.19	0.161
g__Bradyrhizobium	0.94	0.87-1.02	0.122
g__Nitrobacter	0.49	0.18-1.37	0.173
g__Rhodopseudomonas	0.53	0.22-1.28	0.16
g__Devosia	4.1	0.94-17.94	0.061
g__Filomicrobium	0	0-2703164834936721408	0.097
g__Pleomorphomonas	0.08	0.01-0.47	0.005
g__Pseudaminobacter	3.03	0.93-9.9	0.067
g__Neorhizobium	0.29	0.06-1.35	0.113
g__Carideicomes	3.19	1.08-9.47	0.036
g__Fertoebacter	0	0-1.09881700427387e+29	0.176
g__Gemmobacter	16.28	1.78-148.97	0.014
g__Mangrovicoccus	1.32	0.96-1.81	0.089
g__Paenirhodobacter	24.32	1.19-497.22	0.038
g__Rhodobacter	0.32	0.08-1.28	0.108
g__Thioclava	120.29	1.08-13349.12	0.046
g__Ferruginivarius	4.85	1.1-21.46	0.037
g__Altererythrobacter	3.31	0.68-16.04	0.137
g__Blastomonas	5.13	1.15-22.79	0.032
g__Rubrivivax	3.88	0.86-17.47	0.077
g__Tepidimonas	0.32	0.08-1.39	0.129
g__Caballeronia	0.34	0.12-0.92	0.034
g__Cupriavidus	0.22	0.07-0.65	0.007
g__Lautropia	2.53	1.04-6.16	0.041
g__Pandoraea	0.09	0.02-0.55	0.009
g__Trinickia	0.09	0.01-0.88	0.039
g__Rhodoferax	7.89	0.96-64.87	0.055
g__Herbaspirillum	1.45	1.01-2.08	0.044
k__Bacteria_p__Proteobacteria_c__Betaproteobacteria_o__Burkholderiales_f__Sutterellaceae_g__	3.91	0.69-22.08	0.122
g__Neisseria	1.71	0.93-3.14	0.084
g__Stenoxybacter	36.69	1.9-708.88	0.017
g__Methylobacillus	0.08	0.01-0.71	0.023
g__Azonexus	140.35	0.52-37923.42	0.084
g__Propionivibrio	24.26	1.35-435.32	0.03
g__Thauera	0.31	0.09-1.1	0.07
g__Desulfovibrio	0.27	0.06-1.18	0.081
g__Ignatzschineria	8.60942e+06	8278.9-8953141750.5	0
g__Aeromonas	0.38	0.18-0.84	0.016
g__Pseudoalteromonas	2.46	0.98-6.18	0.056
g__Rappaport	0.18	0.04-0.81	0.026
g__Chromatocurvus	5.31	0.57-49.62	0.143
g__Rheinheimera	738.13	3.42-159324.98	0.016
g__Thioalkalivibrio	988.54	13.64-71642.08	0.002
g__Halothiobacillus	0.01	0-1.84	0.085
g__Phytobacter	0.27	0.1-0.75	0.012
g__Plesiomonas	0.07	0.01-0.83	0.035
k__Bacteria_p__Proteobacteria_c__Gammaproteobacteria_o__Enterobacterales_f__Enterobacteriaceae_g__	0.38	0.1-1.41	0.149
g__Atlantibacter	0.29	0.13-0.62	0.001
g__Buttiauxella	0.43	0.15-1.23	0.115
g__Cedecea	0.24	0.07-0.84	0.025
g__Citrobacter	0.68	0.5-0.91	0.01
g__Cronobacter	0.44	0.24-0.82	0.009
g__Edaphovirga	0.26	0.05-1.52	0.136
g__Enterobacillus	0.17	0.03-0.79	0.024
g__Enterobacter	0.66	0.48-0.91	0.012
g__Escherichia	0.76	0.53-1.08	0.127
g__Franconibacter	0.19	0.06-0.63	0.007
g__Gibbsiella	0.17	0.03-1	0.05
g__Izhakiella	0.06	0-2.2	0.125
g__Klebsiella	0.61	0.42-0.9	0.013
g__Kluyvera	0.55	0.34-0.9	0.018
g__Kosakonia	0.54	0.31-0.94	0.029
g__Leclercia	0.18	0.05-0.68	0.012
g__Lelliottia	0.25	0.09-0.68	0.006
g__Limnobaculum	0.07	0-2.58	0.147
g__Mangrovibacter	0.09	0.02-0.4	0.001
g__Metakosakonia	0.1	0.03-0.38	0.001
g__Pluralibacter	0.16	0.04-0.65	0.011
g__Pseudescherichia	0.08	0.01-0.51	0.007
g__Pseudocitrobacter	0.29	0.11-0.74	0.01
g__Raoultella	0.34	0.17-0.69	0.003
g__Salmonella	0.14	0.04-0.5	0.003
g__Shimwellia	0.14	0.03-0.72	0.018
g__Siccibacter	0.21	0.08-0.56	0.002
g__Trabulsiella	0.17	0.05-0.53	0.002
g__Yokenella	0.17	0.04-0.65	0.009
g__Erwinia	0.38	0.17-0.84	0.017
g__Kalamiella	0.21	0.08-0.59	0.003
g__Mixta	0.31	0.1-0.9	0.031
g__Pantoea	0.36	0.17-0.78	0.009
g__Tatumella	0.21	0.05-0.93	0.039
k__Bacteria_p__Proteobacteria_c__Gammaproteobacteria_o__Enterobacterales_f__Hafniaceae_g__	0.04	0-1.4	0.076
g__Edwardsiella	0.27	0.08-0.93	0.038
g__Hafnia	0.13	0.02-0.78	0.026
g__Obesumbacterium	0.32	0.12-0.84	0.02
g__Morganella	0.11	0.03-0.4	0.001
g__Proteus	0.11	0.03-0.44	0.002
g__Providencia	0.12	0.02-0.91	0.04
g__Xenorhabdus	0.14	0.03-0.71	0.017
g__Brenneria	0.21	0.05-0.87	0.032
g__Dickeya	0.35	0.13-0.96	0.041
g__Lonsdalea	0.14	0.03-0.68	0.015
g__Pectobacterium	0.39	0.12-1.24	0.11
g__Chania	0.11	0.01-1.56	0.103
g__Chimaeribacter	0.11	0.02-0.53	0.006
g__Nissabacter	0.14	0.04-0.54	0.004
g__Rahnella	0.27	0.11-0.67	0.004
g__Samsonia	0.07	0-3.37	0.181
g__Serratia	0.53	0.23-1.22	0.136
g__Yersinia	0.37	0.16-0.87	0.022
g__Methylococcus	0.01	0-1.55	0.072
g__Methylovulum	0.13	0.01-1.95	0.141
g__Alcanivorax	1.11	1.01-1.23	0.032
g__Halomonas	0.57	0.26-1.27	0.17
g__Kangiella	0.47	0.2-1.11	0.085
g__Frischella	0.09	0.02-0.47	0.004
g__Gilliamella	0.29	0.05-1.5	0.139
k__Bacteria_p__Proteobacteria_c__Gammaproteobacteria_o__Pasteurellales_f__Pasteurellaceae_g__	7981.02	0.56-114529421.31	0.066
g__Actinobacillus	0.21	0.08-0.57	0.002
g__Avibacterium	350.09	1.21-101268.98	0.043
g__Gallibacterium	0.18	0.05-0.63	0.008
g__Thioflexothrix	1.11	0.97-1.27	0.122
g__Thiolinea	0.01	0-0.44	0.016
g__Aliivibrio	0.21	0.03-1.43	0.11
g__Brachyspira	418769	610.96-287037131.5	0
g__Entomoplasma	35613.8	417.62-3037082.2	0
g__Ureaplasma	12.59	0.33-482.22	0.173
g__Phragmitibacter	9.28	0.49-176.79	0.138
g__Aureobasidium	2.24	0.95-5.25	0.065
g__Cercospora	5.76	0.41-80.74	0.194
g__Zymoseptoria	154.42	6.01-3968.02	0.002
g__Neohortaea	112480	121.12-104453591.24	0.001
g__Alternaria	2.04	0.86-4.83	0.104
g__Exserohilum	2.47	1.12-5.43	0.025
g__Westerdykella	1.36	0.95-1.96	0.092
g__Cladophialophora	1.64	0.83-3.23	0.152
g__Amorphotheca	1.34	0.93-1.93	0.115
g__Venustampulla	12977.4	84.26-1998600.03	0
g__Cyberlindnera	1.59	0.85-3	0.147
g__Wickerhamomyces	0.24	0.06-1.01	0.052
g__Grosmannia	1.18	0.99-1.41	0.071
g__Xylona	1.24	0.92-1.65	0.155
g__Kwoniella	1.86	0.85-4.08	0.12
g__Kockovaella	6.78	1.39-33.07	0.018

## Sheet: CESC
characteristics	Hazard.Ratio	CI95	P.Value
k__Bacteria_p___c___o___f___g__	0.8	0.6-1.08	0.141
g__Gleimia	0.05	0-0.97	0.048
g__Pauljensenia	0.04	0-3.11	0.146
g__Parascardovia	0.04	0-2.16	0.114
g__Cellulomonas	3.91	0.66-23.03	0.132
g__Terracoccus	0	0-217.73	0.138
g__Tetrasphaera	0.86	0.75-1	0.047
g__Clavibacter	0.24	0.05-1.27	0.094
g__Paenarthrobacter	1.21	0.99-1.48	0.069
g__Marmoricola	0	0-0.23	0.018
g__Propionibacterium	4.5	0.52-39.29	0.173
g__Actinocorallia	0.52	0.19-1.39	0.191
g__Tetzosporium	0.05	0-1.38	0.076
g__Aliicoccus	0.01	0-0.82	0.04
g__Carnobacterium	0.28	0.06-1.31	0.106
g__Dolosigranulum	0.56	0.25-1.25	0.155
g__Lactobacillus	0.55	0.27-1.15	0.112
g__Heliobacterium	10.52	0.41-271.48	0.156
g__Caldanaerobacter	0.59	0.29-1.22	0.153
g__Tissierella	0.94	0.87-1.01	0.081
g__Afipia	0.16	0.03-0.87	0.034
g__Ochrobactrum	0.27	0.05-1.38	0.115
g__Chelatococcus	0	0-1484352687086.73	0.181
g__Enterovirga	0	0-5.84	0.062
g__Hansschlegelia	0	0-6.72	0.087
g__Methylocystis	0	0-6796252.99	0.197
g__Neorhizobium	0.04	0-1.59	0.086
g__Rhizobium	0.37	0.09-1.44	0.15
g__Mangrovicoccus	0.65	0.37-1.12	0.118
g__Pannonibacter	0	0-12.28	0.096
g__Paraoceanicella	0	0-20096.25	0.087
g__Pelagivirga	1.18	0.96-1.45	0.109
g__Thalassobacter	0.16	0.01-1.8	0.138
g__Enhydrobacter	0	0-0.12	0.02
g__Reyranella	0	0-0.77	0.045
g__Acetobacter	0.34	0.07-1.67	0.182
g__Zavarzinia	0	0-47900.79	0.101
g__Croceicoccus	0	0-5.17	0.072
g__Trinickia	11.24	0.28-451.42	0.199
g__Alicycliphilus	21.01	0.88-500.02	0.06
g__Gibbsiella	0	0-0.72	0.037
g__Tatumella	13.56	0.98-188.47	0.052
g__Kangiella	0.7	0.43-1.15	0.165
g__Psychrobacter	0	0-0.31	0.021
g__Pseudomonas	1.15	0.95-1.38	0.151
g__Mycoplasma	1.1	0.96-1.25	0.17
g__Macroventuria	1.84	0.77-4.4	0.172
g__Fonsecaea	0.58	0.33-1.02	0.059
g__Cyberlindnera	0.34	0.11-1.04	0.058
g__Verticillium	0.72	0.46-1.13	0.157
g__Purpureocillium	0.53	0.2-1.39	0.199
g__Podospora	0.74	0.51-1.05	0.092

## Sheet: COAD
characteristics	Hazard.Ratio	CI95	P.Value
k__Bacteria_p__Actinobacteria_c__Actinobacteria_o__Actinomycetales_f__Actinomycetaceae_g__	0.36	0.1-1.29	0.118
g__Ancrocorticia	6.84	1.18-39.54	0.032
g__Barrientosiimonas	41.98	4.79-367.88	0.001
g__Micromonospora	0.53	0.24-1.17	0.115
g__Propionibacterium	4.67	0.45-48.67	0.197
k__Bacteria_p__Actinobacteria_c__Coriobacteriia_o__Eggerthellales_f__Eggerthellaceae_g__	1.81	0.85-3.85	0.123
g__Adlercreutzia	0.42	0.14-1.32	0.139
g__Asaccharobacter	0.42	0.12-1.5	0.184
g__Rubrobacter	21.39	0.35-1301.86	0.144
k__Bacteria_p__Bacteroidetes_c__Bacteroidia_o__Bacteroidales_f__Bacteroidaceae_g__	1.16	1.01-1.34	0.038
g__Barnesiella	0.86	0.7-1.07	0.182
g__Chitinophaga	11.1	0.4-307.12	0.155
g__Amniculibacterium	5.22	0.77-35.39	0.091
g__Apibacter	5.83	1.02-33.46	0.048
g__Myroides	2.52	1-6.38	0.051
g__Vaginella	12.74	1.91-84.83	0.009
g__Phaeodactylibacter	4.54	0.61-33.69	0.139
g__Parapedobacter	34930.5	23.08-52876753.45	0.005
g__Sphingobacterium	2.5	0.76-8.21	0.132
g__Limnospira	4	0.6-26.54	0.151
k__Bacteria_p__Firmicutes_c___o___f___g__	0.03	0-5.86	0.188
g__Amphibacillus	5.35	1.42-20.22	0.013
g__Pontibacillus	1.94	0.96-3.94	0.067
g__Lactobacillus	1.31	0.87-1.98	0.19
g__Streptococcus	0.75	0.56-0.99	0.045
g__Proteiniclasticum	18.2	2.24-148.26	0.007
g__Eisenbergiella	1.13	0.97-1.32	0.129
g__Stomatobaculum	0.46	0.16-1.36	0.16
g__Peptacetobacter	0.09	0-2.05	0.133
g__Anaerotruncus	1.32	0.97-1.8	0.075
g__Vallitalea	9.31	0.54-161.02	0.125
g__Turicibacter	2.34	1.32-4.15	0.004
g__Veillonella	0.78	0.54-1.12	0.18
g__Kiloniella	9.19	1.46-57.67	0.018
g__Methylobacterium	2.36	0.91-6.09	0.076
g__Brevirhabdus	7.99	1.13-56.58	0.037
g__Rhodovastum	5.82	0.76-44.86	0.091
g__Azospirillum	5.64	0.58-54.67	0.135
g__Tistrella	89.27	5.05-1577.92	0.002
g__Roseateles	1.91	1.04-3.52	0.038
k__Bacteria_p__Proteobacteria_c__Betaproteobacteria_o__Burkholderiales_f__Alcaligenaceae_g__	3.7	1.78-7.71	0
g__Candidimonas	33.19	1.04-1058.38	0.047
g__Xenophilus	2.55	0.85-7.69	0.096
k__Bacteria_p__Proteobacteria_c__Betaproteobacteria_o__Burkholderiales_f__Sutterellaceae_g__	0.77	0.56-1.06	0.113
g__Duodenibacillus	0.29	0.05-1.53	0.143
g__Parasutterella	1.18	0.92-1.52	0.184
g__Chitinilyticum	5.17	0.58-46.07	0.141
g__Microvirgula	7.09	0.89-56.25	0.064
g__Eikenella	0.28	0.1-0.81	0.019
g__Kingella	0.29	0.07-1.22	0.091
g__Morococcus	0.28	0.1-0.82	0.021
g__Neisseria	0.38	0.2-0.71	0.003
g__Rivicola	180.36	2.24-14494.57	0.02
g__Methyloversatilis	3.19	0.84-12.04	0.088
g__Zoogloea	12.22	0.48-309.98	0.129
k__Bacteria_p__Proteobacteria_c__Deltaproteobacteria_o__Desulfovibrionales_f__Desulfovibrionaceae_g__	0.01	0-6.65	0.151
g__Desulfovibrio	0.61	0.3-1.27	0.191
g__Pseudodesulfovibrio	9.67	0.31-306.12	0.198
g__Anaerobiospirillum	27.2	0.58-1286.9	0.093
g__Pseudoalteromonas	1.64	0.79-3.4	0.184
g__Microbulbifer	9.99	0.71-139.67	0.087
g__Pararheinheimera	0	0-2.15	0.078
g__Solimonas	2.38	0.74-7.69	0.147
g__Halotalea	456.89	1.74-120141.51	0.031
g__Kushneria	0.69	0.4-1.2	0.186
k__Bacteria_p__Proteobacteria_c__Gammaproteobacteria_o__Pasteurellales_f__Pasteurellaceae_g__	0.04	0-1.34	0.072
g__Chelonobacter	592.53	3.92-89468.22	0.013
g__Pasteurella	0	0-0.2	0.007
g__Acinetobacter	0.94	0.86-1.02	0.136
g__Azotobacter	3.3	1.48-7.36	0.004
g__Aerosticca	35.29	0.64-1942.79	0.081
g__Arenimonas	22.02	2.09-232.15	0.01
g__Tepidiphilus	4.24	0.8-22.45	0.089
g__Synergistes	124.49	6.42-2412.81	0.001
g__Roseimicrobium	9.37	0.42-208.02	0.157
g__Dissoconium	0.06	0-1.72	0.1
g__Phialemoniopsis	1.2	0.97-1.48	0.094
g__Sparassis	18.85	0.23-1556.5	0.192

## Sheet: ESCA
characteristics	Hazard.Ratio	CI95	P.Value
k__Bacteria_p___c___o___f___g__	1.17	0.95-1.45	0.148
g__Acidithrix	3.42	0.91-12.86	0.069
g__Ferrimicrobium	3.66	1.03-12.98	0.045
g__Actinotignum	1.25	0.93-1.69	0.144
g__Flaviflexus	0.16	0.01-2.15	0.167
g__Winkia	0	0-10.71	0.168
g__Gordonia	1.12	0.94-1.32	0.196
g__Williamsia	0.47	0.17-1.35	0.161
g__Klenkia	0.1	0.01-1.14	0.064
g__Pseudokineococcus	0	0-15.61	0.179
g__Brevibacterium	1.24	0.92-1.68	0.163
g__Gulosibacter	8.39	1.2-58.81	0.032
g__Micrococcus	1.13	0.96-1.32	0.146
g__Pseudarthrobacter	1.05	0.99-1.11	0.119
g__Pseudoglutamicibacter	1.59	0.83-3.03	0.16
g__Propionicimonas	2.54	0.74-8.71	0.139
g__Acidipropionibacterium	1.2	0.94-1.52	0.144
g__Aestuariimicrobium	2.48	0.93-6.63	0.07
g__Luteococcus	2.59	1.18-5.68	0.018
k__Bacteria_p__Actinobacteria_c__Actinobacteria_o__Propionibacteriales_f__Propionibacteriaceae_g__Ponticoccus	5.73	1.02-32.15	0.047
g__Propioniferax	12.83	0.59-278.78	0.104
g__Actinomycetospora	0	0-2.18	0.076
g__Allosalinactinospora	2.28507e+06	0.02-267973045440271	0.122
g__Acrocarpospora	5670.61	0.01-2975754893.71	0.198
g__Coriobacterium	0	0-0.25	0.038
g__Enorma	125981000000	0.11-1.47795859191754e+23	0.071
g__Baekduia	4.25	0.76-23.66	0.098
g__Patulibacter	2.79	0.92-8.44	0.069
g__Thermoleophilum	9.16	0.74-113.47	0.085
g__Persephonella	60557	0-1201219640251.97	0.199
k__Bacteria_p__Bacteroidetes_c__Bacteroidia_o__Bacteroidales_f___g__	3.53	1.05-11.88	0.042
g__Balneicella	2221.46	0.25-19767847.4	0.097
k__Bacteria_p__Bacteroidetes_c__Bacteroidia_o__Bacteroidales_f__Dysgonamonadaceae_g__	1.12	0.96-1.31	0.163
g__Proteiniphilum	1.25	0.92-1.69	0.152
g__Lascolabacillus	1.46	0.86-2.48	0.165
g__Petrimonas	1.35	0.93-1.96	0.11
g__Porphyromonas	1.17	1.01-1.36	0.034
k__Bacteria_p__Bacteroidetes_c__Bacteroidia_o__Bacteroidales_f__Prevotellaceae_g__	1.16	0.94-1.42	0.174
g__Anaerophaga	987210	23.56-41363264715.82	0.011
g__Marinilabilia	5.01242e+06	141.76-177233748139.17	0.004
g__Sediminibacterium	69.57	1.01-4787.66	0.049
g__Arcticibacterium	377336	63.76-2233065279.4	0.004
g__Chryseotalea	10274.5	0.01-7239759338.66	0.179
g__Dyadobacter	2.47	0.64-9.57	0.189
g__Flexibacter	1192.78	31.49-45175.65	0
g__Larkinella	0.57	0.31-1.03	0.062
g__Roseivirga	351.71	0.34-368043.29	0.098
g__Adhaeribacter	142.93	7.67-2663.33	0.001
g__Blattabacterium	136713	29.22-639606662.8	0.006
g__Fluviicola	702.44	4.08-120928.14	0.013
g__Phaeocystidibacter	104545	92.21-118531364.64	0.001
k__Bacteria_p__Bacteroidetes_c__Flavobacteriia_o__Flavobacteriales_f__Flavobacteriaceae_g__	945.28	16-55856.28	0.001
g__Aequorivita	9.9	1.62-60.51	0.013
g__Algibacter	21.72	6.23-75.68	0
g__Altibacter	5023.21	28.2-894695.55	0.001
g__Antarcticibacterium	1050.16	19.06-57869.78	0.001
g__Apibacter	23.26	3.05-177.26	0.002
g__Aquimarina	18.97	2.82-127.46	0.002
g__Arenibacter	24919.5	49.58-12525786.49	0.001
g__Arenitalea	1811.69	19.83-165519.43	0.001
g__Aureicoccus	119.07	0.55-25637.57	0.081
g__Aureitalea	709.06	16.48-30516.44	0.001
g__Bizionia	118.66	8.31-1694.43	0
g__Cellulophaga	10.51	2.78-39.69	0.001
g__Changchengzhania	1.42958e+06	183.25-11152500844.51	0.002
g__Chryseobacterium	1.16	1.01-1.34	0.036
g__Croceitalea	3.20805e+07	1728.47-595413528584.93	0.001
g__Cruoricaptor	22.67	2.64-194.9	0.004
g__Dokdonia	395630	143.01-1094470214.6	0.001
g__Elizabethkingia	1.23	0.9-1.68	0.191
g__Empedobacter	2.72	0.71-10.37	0.142
g__Euzebyella	3.00329e+08	783.94-115056150908423	0.003
g__Flagellimonas	73974.9	9.61-569401904.97	0.014
g__Flavivirga	1.93543e+06	322.7-11607855196.11	0.001
g__Flavobacterium	1.24	1-1.54	0.048
g__Formosa	44.52	4.88-405.82	0.001
g__Galbibacter	418.82	15.6-11247.63	0
g__Gelidibacter	176.73	3.27-9540.37	0.011
g__Gillisia	63.92	5.72-714.32	0.001
g__Gramella	2.86	0.58-14.15	0.197
g__Hanstruepera	1.79396e+07	635.67-506286800989.1	0.001
g__Hyunsoonleella	452.87	11.95-17156.08	0.001
g__Imtechella	61.63	5.4-703.15	0.001
g__Jejuia	4.64575e+08	1612.78-133824659784261	0.002
g__Joostella	521.48	15.22-17861.83	0.001
g__Kordia	4.28	0.87-21.12	0.074
g__Kriegella	2.57629e+07	0.01-45158907494052864	0.116
g__Leptobacterium	6.27	2.16-18.18	0.001
g__Lutibacter	56.59	4.59-697.59	0.002
g__Mangrovimonas	143.7	4.38-4713.07	0.005
g__Maribacter	41.65	4.39-395.49	0.001
g__Mariniflexile	316109000000000	5463.28-1.82902784730698e+25	0.008
g__Meridianimaribacter	279.23	9.92-7859.71	0.001
g__Mesoflavibacter	1.63575e+06	253.66-10548041786.15	0.001
g__Muriicola	37744957349	3097.88-459889623694584384	0.003
g__Oceanihabitans	12715	47.89-3376235.87	0.001
g__Ochrovirga	107409000000000	414.39-2.78402005705705e+25	0.016
g__Olleya	147.01	8.2-2636.77	0.001
g__Polaribacter	29.26	2.12-403.62	0.012
g__Psychroflexus	7.64	2.2-26.53	0.001
g__Psychroserpens	1535.22	15.21-154987.18	0.002
g__Pustulibacterium	78.22	6.86-892.28	0
g__Robertkochia	37.56	5.03-280.64	0
g__Salinimicrobium	1023.18	8.72-120024.34	0.004
g__Seonamhaeicola	61181487881	4543.43-823865567864405632	0.003
g__Sinomicrobium	14.47	3.2-65.35	0.001
g__Spongiivirga	737879000000	0.62-8.74741780490257e+23	0.054
g__Tamlana	3.99	1.81-8.79	0.001
g__Tenacibaculum	3.61	1.16-11.23	0.027
g__Ulvibacter	31.91	4.52-225.16	0.001
g__Urechidicola	71072248893	6300.05-801781636950005248	0.003
g__Winogradskyella	49.71	5.14-481.27	0.001
g__Xanthomarina	1.90565e+06	312.76-11611134111.69	0.001
g__Haliscomenobacter	3.08904e+06	0.29-32777961859400.2	0.07
g__Lewinella	5234.71	12.93-2118996.87	0.005
g__Pseudopedobacter	738.42	18.2-29954.67	0
g__Aliifodinibius	351992000000000	3026.65-4.09357406791313e+25	0.01
g__Gracilimonas	1534000000000000	28991.81-8.11659384138584e+25	0.006
g__Flexilinea	3.75	0.54-26.07	0.181
g__Geminocystis	1.38665e+07	0.04-4537828771797189	0.1
g__Cylindrospermum	2.52	0.64-9.96	0.186
g__Synechococcus	6.83	0.99-47.34	0.052
g__Gloeobacter	3846834687	42.96-344476519790402240	0.018
g__Thermus	0.72	0.49-1.06	0.098
g__Gemella	1.2	1-1.43	0.045
k__Bacteria_p__Firmicutes_c__Bacilli_o__Bacillales_f__Bacillaceae_g__	0.09	0-2.34	0.145
g__Alteribacillus	0	0-4873.37	0.145
g__Aureibacillus	0	0-83.4	0.154
g__Pueribacillus	52325.7	5.96-459035313.38	0.019
g__Streptohalobacillus	0	0-0.04	0.034
g__Tepidibacillus	0	0-3085.09	0.131
g__Aneurinibacillus	0.36	0.09-1.5	0.161
g__Caryophanon	0	0-0.12	0.032
g__Solibacillus	1.98	1.08-3.63	0.028
g__Kroppenstedtia	4.94	0.66-36.93	0.119
g__Shimazuella	0	0-47.34	0.101
g__Eremococcus	5.14	0.98-26.96	0.053
g__Isobaculum	1.03399e+08	0.97-10989492247606956	0.05
g__Fonticella	3.36	1.43-7.9	0.005
g__Serpentinicella	6.05062e+06	76.09-481168163983.67	0.007
g__Thermaerobacter	0	0-2066.75	0.157
g__Heliobacillus	3.52	0.96-12.91	0.058
g__Parasporobacterium	14.15	3.73-53.59	0
g__Desulfitibacter	850.46	27.45-26346.94	0
g__Marasmitruncus	0	0-245.97	0.184
g__Sporobacter	80.99	9.89-663.08	0
g__Longicatena	112891	0.16-80625150478.61	0.091
g__Veillonella	0.88	0.77-1	0.056
g__Ezakiella	1.77	1.15-2.74	0.009
g__Miniphocibacter	5.25	0.65-42.05	0.119
g__Peptoniphilus	1.21	1.02-1.45	0.03
g__Oceanivirga	5.79	2.73-12.29	0
g__Sebaldella	2.8	1.42-5.51	0.003
g__Bythopirellula	776785000000	5384.13-1.12069220566135e+20	0.004
g__Roseimaritima	3.82	1.07-13.64	0.039
g__Amphiplicatus	0	0-12438.47	0.187
g__Methylobrevis	1.81389e+07	10.93-30089276868220.5	0.022
k__Bacteria_p__Proteobacteria_c__Alphaproteobacteria_o__Rhizobiales_f__Beijerinckiaceae_g__	47.05	0.37-6061.73	0.12
g__Methylocapsa	4.25	0.76-23.63	0.099
g__Afipia	1.11	0.96-1.28	0.163
g__Nitrobacter	0.25	0.06-1.05	0.059
g__Pleomorphomonas	0.13	0.01-2.91	0.196
g__Mesorhizobium	1.24	0.89-1.72	0.199
g__Salinarimonas	9255.36	0.1-870584989.76	0.118
g__Pseudoxanthobacter	416.79	3.27-53175.64	0.015
g__Starkeya	2638.78	1.42-4904415.05	0.04
g__Xanthobacter	1.33	0.97-1.81	0.077
g__Henriciella	1.88764e+06	310.77-11465775539.34	0.001
g__Hyphomonas	15667100000000	22.23-1.10435611148302e+25	0.029
g__Halocynthiibacter	0	0-39.09	0.085
g__Nioella	0	0-384.89	0.143
g__Paenirhodobacter	2.98	0.98-9.08	0.054
g__Pontivivens	0	0-7052.48	0.158
g__Pseudogemmobacter	0	0-126.61	0.176
g__Rhodobaca	0	0-71.17	0.181
g__Salinihabitans	0	0-0.14	0.035
g__Shimia	0	0-352.94	0.156
g__Thalassobius	4.05	0.57-28.96	0.164
g__Wenxinia	5.04	0.61-41.71	0.134
g__Yangia	0	0-67.74	0.183
g__Yoonia	0	0-52.05	0.112
g__Enhydrobacter	1.33	0.92-1.93	0.134
g__Roseomonas	0.77	0.54-1.1	0.152
g__Rubritepida	26.88	1.01-716.29	0.049
k__Bacteria_p__Proteobacteria_c__Alphaproteobacteria_o__Rhodospirillales_f__Rhodospirillaceae_g__	178703000000	0-4.80295395784017e+25	0.126
g__Indioceanicola	24.8	0.64-960.81	0.085
g__Nitrospirillum	28.65	0.69-1194.04	0.078
g__Novispirillum	2.77	1.14-6.73	0.025
g__Tistrella	0.61	0.31-1.2	0.153
g__Croceibacterium	7.47	0.54-104.24	0.135
g__Qipengyuania	6.35	0.96-42.18	0.056
g__Novosphingopyxis	18.05	0.33-996.63	0.157
g__Casimicrobium	0.5	0.21-1.22	0.13
g__Tepidimonas	0.76	0.55-1.05	0.097
k__Bacteria_p__Proteobacteria_c__Betaproteobacteria_o__Burkholderiales_f__Alcaligenaceae_g__	0.26	0.07-1.03	0.055
g__Achromobacter	0.87	0.75-1.02	0.077
g__Alcaligenes	0.64	0.33-1.25	0.194
g__Bordetella	0.81	0.62-1.05	0.112
g__Castellaniella	0.65	0.41-1.03	0.065
g__Eoetvoesia	0.85	0.69-1.05	0.136
g__Kerstersia	0.09	0.01-0.74	0.026
g__Pigmentiphaga	0.53	0.25-1.1	0.087
g__Cupriavidus	0.8	0.66-0.98	0.027
g__Paraburkholderia	0.76	0.57-1.03	0.074
g__Corticibacter	0.56	0.24-1.28	0.169
g__Delftia	0.86	0.71-1.03	0.092
g__Extensimonas	0.74	0.47-1.17	0.199
g__Lampropedia	0.69	0.43-1.12	0.133
g__Pulveribacter	0.28	0.06-1.39	0.119
g__Xenophilus	0.7	0.45-1.08	0.109
g__Collimonas	0.37	0.08-1.67	0.195
g__Solimicrobium	0.14	0.01-1.72	0.124
g__Leeia	0	0-35	0.184
g__Pseudogulbenkiania	0.06	0-1.88	0.11
g__Chitinolyticbacter	0	0-11.38	0.176
g__Aromatoleum	0.4	0.1-1.54	0.181
g__Azoarcus	0.72	0.46-1.12	0.14
g__Zoogloea	0.58	0.29-1.15	0.118
g__Desulfocapsa	0.03	0-4.97	0.181
g__Desulfurella	582.61	0.14-2511457.22	0.136
g__Geopsychrobacter	0	0-0	0.01
g__Vulgatibacter	0	0-360.54	0.095
g__Desulfobacca	0	0-120.18	0.142
g__Campylobacter	1.36	1.03-1.8	0.032
g__Sulfurospirillum	6.16	0.9-42.37	0.065
g__Sulfuricaulis	0.12	0.01-2.47	0.17
g__Aeromonas	0.88	0.72-1.07	0.196
g__Succinimonas	0.3	0.08-1.2	0.089
g__Aestuariibacter	0	0-13.82	0.076
g__Thalassotalea	0.75	0.5-1.14	0.181
g__Psychromonas	2.25	0.81-6.21	0.118
g__Cardiobacterium	0.51	0.26-1.02	0.057
g__Suttonella	0.63	0.31-1.27	0.196
g__Porticoccus	0.47	0.17-1.32	0.152
g__Oceanicoccus	0.45	0.13-1.52	0.197
g__Allochromatium	0.61	0.31-1.21	0.155
g__Marichromatium	0.62	0.31-1.23	0.172
g__Thermochromatium	0.37	0.12-1.14	0.082
g__Thiohalocapsa	0.36	0.1-1.35	0.129
g__Phytobacter	0.55	0.31-1	0.051
g__Pragia	0.26	0.04-1.62	0.148
g__Enterobacter	0.8	0.59-1.07	0.136
g__Kalamiella	1.57	0.86-2.88	0.142
g__Pantoea	1.31	0.98-1.76	0.066
g__Phaseolibacter	9973.52	0.75-133262358.51	0.057
k__Bacteria_p__Proteobacteria_c__Gammaproteobacteria_o__Enterobacterales_f__Hafniaceae_g__	140.81	0.22-91794.93	0.135
g__Arsenophonus	0.39	0.1-1.48	0.165
g__Morganella	0.35	0.12-1.05	0.06
g__Photorhabdus	0.7	0.44-1.11	0.131
g__Chania	0.33	0.07-1.48	0.148
g__Chimaeribacter	0.05	0-3.07	0.157
g__Immundisolibacter	0.13	0.02-1.18	0.07
g__Methylomicrobium	0.8	0.56-1.13	0.198
g__Stenotrophobium	0.21	0.03-1.45	0.113
g__Marinicella	0.19	0.02-2.03	0.17
g__Sansalvadorimonas	0.47	0.16-1.38	0.171
g__Aliikangiella	0.39	0.11-1.47	0.166
g__Neptunomonas	0.87	0.7-1.06	0.173
g__Oleibacter	0.56	0.24-1.32	0.187
g__Gallibacterium	0.57	0.25-1.31	0.187
g__Paraperlucidibaca	0.63	0.36-1.12	0.119
g__Caedibacter	0.12	0.01-1.25	0.076
g__Thiofilum	4.93	1.19-20.36	0.028
g__Grimontia	0.43	0.13-1.43	0.169
g__Aerosticca	0.6	0.29-1.26	0.177
g__Dyella	0.64	0.34-1.22	0.172
g__Rudaea	0.02	0-4.04	0.147
g__Luteimonas	0.82	0.64-1.06	0.129
g__Pseudoxanthomonas	0.87	0.72-1.06	0.171
g__Vulcaniibacterium	0.19	0.02-2.26	0.188
g__Xanthomonas	0.88	0.74-1.04	0.137
g__Xylella	0.72	0.43-1.19	0.199
g__Tepidiphilus	0.62	0.39-1.01	0.053
g__Bacteriovorax	5.14	1.14-23.22	0.033
g__Verruconis	1.94	0.78-4.82	0.153
g__Trichoderma	1.71	1.17-2.49	0.006
g__Synchytrium	19.79	0.48-820.38	0.116
g__Mitosporidium	0	0-30799.53	0.152

## Sheet: GBM
characteristics	Hazard.Ratio	CI95	P.Value
k__Bacteria_p___c___o___f___g__	0.85	0.67-1.08	0.196
g__Pyrinomonas	2.9	1.03-8.18	0.045
g__Actinobaculum	1.67	0.86-3.25	0.131
g__Mobiluncus	2.42	0.66-8.87	0.184
g__Pauljensenia	1.84	1.17-2.9	0.009
g__Schaalia	1.33	0.95-1.87	0.094
g__Actinospica	1.66	0.9-3.07	0.107
g__Gordonia	1.2	0.99-1.44	0.057
g__Mycobacterium	0.83	0.67-1.03	0.097
g__Mycolicibacter	1.84	0.96-3.53	0.066
g__Tsukamurella	1.62	1.12-2.33	0.01
g__Jatrophihabitans	2.78	0.88-8.78	0.08
g__Klenkia	1.35	0.86-2.11	0.191
g__Haloglycomyces	4.44	1.12-17.62	0.034
g__Haloactinopolyspora	14.05	0.61-325.11	0.099
g__Quadrisphaera	2.64	1-6.99	0.051
g__Calidifontibacter	1.34	0.87-2.07	0.185
g__Mobilicoccus	2.15	1.18-3.95	0.013
g__Gulosibacter	1.77	0.76-4.14	0.188
g__Leucobacter	1.3	0.96-1.77	0.093
g__Rhodoluna	0.48	0.18-1.29	0.146
g__Auritidibacter	1.54	0.87-2.72	0.136
g__Actinoplanes	1.66	0.95-2.89	0.073
g__Dactylosporangium	2.48	0.7-8.8	0.159
g__Salinispora	4.13	1.55-11.01	0.005
g__Aeromicrobium	1.43	1-2.06	0.051
g__Kribbella	1.64	0.93-2.89	0.088
g__Marmoricola	1.36	0.91-2.03	0.134
g__Nocardioides	1.2	1.01-1.43	0.038
g__Pimelobacter	2.73	1.12-6.69	0.027
g__Auraticoccus	1.31	0.89-1.93	0.166
g__Microlunatus	1.2	0.91-1.59	0.198
g__Naumannella	1.51	0.85-2.7	0.16
g__Actinophytocola	1.83	0.94-3.55	0.076
g__Allokutzneria	7.34	1.21-44.72	0.031
g__Crossiella	3.08	0.66-14.39	0.153
g__Kibdelosporangium	4.72	1.81-12.28	0.001
g__Lentzea	3.9	1.55-9.78	0.004
g__Marinitenerispora	4.27	1.19-15.28	0.026
g__Acrocarpospora	2.31	0.81-6.59	0.118
g__Microtetraspora	4.54	1.33-15.46	0.016
g__Streptosporangium	1.6	0.85-3	0.145
g__Actinomadura	0.9	0.78-1.04	0.168
g__Alloprevotella	1.6	0.92-2.79	0.095
g__Parabacteroides	1.97	1.12-3.46	0.019
g__Spirosoma	1.78	0.82-3.86	0.144
g__Aquimarina	0.54	0.24-1.22	0.136
g__Myroides	0.51	0.19-1.42	0.199
g__Euhalothece	6.74	0.46-99.81	0.165
g__Rippkaea	2.24	0.68-7.42	0.185
g__Chroococcidiopsis	2.15	0.91-5.07	0.079
g__Gloeomargarita	29.17	2.09-407.4	0.012
g__Aphanizomenon	2.29	0.96-5.44	0.062
g__Nodularia	1.72	0.83-3.57	0.143
g__Raphidiopsis	2.17	0.92-5.12	0.077
g__Sphaerospermopsis	2.74	0.98-7.66	0.054
g__Calothrix	1.34	0.89-2.02	0.158
g__Fischerella	3.74	1.55-9.04	0.003
g__Mastigocoleus	2.33	0.74-7.32	0.148
g__Nostoc	1.24	0.9-1.69	0.186
g__Scytonema	1.65	1.03-2.65	0.039
g__Tolypothrix	1.27	0.9-1.81	0.179
g__Stanieria	4.19	1.11-15.73	0.034
g__Hydrococcus	5.7	0.7-46.53	0.105
g__Pleurocapsa	4.17	0.84-20.78	0.082
g__Acaryochloris	5.84	1.05-32.67	0.044
g__Leptolyngbya	2.13	1-4.53	0.051
g__Halomicronema	3.42	0.7-16.82	0.13
g__Prochlorothrix	7.06	0.51-97.38	0.144
g__Limnothrix	9.74	0.61-155.86	0.108
g__Synechococcus	2.76	0.62-12.34	0.184
g__Thermosynechococcus	4.44	0.87-22.63	0.073
g__Thermus	0.76	0.54-1.07	0.117
g__Desulfuribacillus	212.05	1.22-36946.24	0.042
g__Listeria	1.69	1.08-2.64	0.022
g__Cohnella	2.61	0.76-8.92	0.126
g__Kurthia	2.71	1.57-4.69	0
g__Rummeliibacillus	3.37	1.19-9.56	0.022
g__Macrococcus	1.51	1-2.28	0.049
k__Bacteria_p__Firmicutes_c__Bacilli_o__Lactobacillales_f___g__	1.6	0.98-2.63	0.062
g__Facklamia	1.86	0.89-3.89	0.097
g__Pediococcus	1.67	0.87-3.23	0.125
g__Floricoccus	5.94	1.2-29.4	0.029
g__Enterocloster	2.75	1.27-5.96	0.01
g__Pseudobutyrivibrio	16.3	0.96-276.03	0.053
k__Bacteria_p__Firmicutes_c__Clostridia_o__Clostridiales_f__Ruminococcaceae_g__	0.81	0.66-0.99	0.041
g__Erysipelatoclostridium	2.6	0.74-9.19	0.138
g__Megasphaera	1.32	0.88-1.98	0.18
g__Veillonella	1.11	0.95-1.29	0.179
g__Leptotrichia	1.31	1.02-1.68	0.032
g__Planctopirus	0.81	0.61-1.06	0.129
g__Methylocella	3.94	1.07-14.45	0.039
g__Rhodoblastus	6.54	1.58-27.02	0.009
g__Ochrobactrum	1.21	0.96-1.52	0.102
g__Lichenibacterium	1.52	1.07-2.14	0.019
g__Methylobacterium	1.15	0.94-1.42	0.173
g__Acuticoccus	2.45	1.07-5.59	0.034
g__Mangrovicoccus	0.8	0.63-1.01	0.055
g__Pelagivirga	0.75	0.5-1.12	0.161
g__Pseudooceanicola	0.67	0.44-1.01	0.058
g__Rickettsia	1.36	0.87-2.12	0.18
g__Saezia	0.91	0.78-1.05	0.19
g__Delftia	0.86	0.71-1.05	0.15
g__Neisseria	1.18	1.01-1.38	0.04
k__Bacteria_p__Proteobacteria_c__Epsilonproteobacteria_o__Campylobacterales_f__Campylobacteraceae_g__	1.87	0.88-3.99	0.106
g__Idiomarina	0.81	0.61-1.09	0.164
g__Cedecea	0.8	0.58-1.11	0.184
g__Ewingella	0.89	0.76-1.04	0.142
g__Kushneria	0.81	0.65-1	0.052
k__Bacteria_p__Proteobacteria_c__Gammaproteobacteria_o__Pasteurellales_f__Pasteurellaceae_g__	1.77	0.98-3.21	0.058
g__Avibacterium	2.49	1.24-4.99	0.01
g__Basfia	4.51	1.39-14.67	0.012
g__Bibersteinia	2.52	0.95-6.67	0.064
g__Bisgaardia	27.03	1.29-567.63	0.034
g__Caviibacterium	30.5	1.13-825.3	0.042
g__Conservatibacter	4.71	1.22-18.1	0.024
g__Haemophilus	1.13	0.95-1.35	0.167
g__Histophilus	249.53	4-15568.71	0.009
g__Mannheimia	1.55	0.89-2.67	0.119
g__Nicoletella	4.43	0.58-34.04	0.153
g__Phocoenobacter	4.82	1.69-13.77	0.003
g__Ursidibacter	3.51	0.97-12.72	0.056
g__Vespertiliibacter	11.06	1.2-101.64	0.034
g__Thiothrix	2.72	0.71-10.4	0.144
g__Acholeplasma	4.42	1.16-16.81	0.029
g__Prosthecobacter	3.45	0.95-12.53	0.06
g__Ramularia	0.89	0.77-1.03	0.121
g__Gaeumannomyces	0.68	0.39-1.19	0.177
g__Podospora	0.67	0.38-1.21	0.184
g__Malassezia	0.91	0.81-1.02	0.12

## Sheet: HNSC
characteristics	Hazard.Ratio	CI95	P.Value
g__Schaalia	0.74	0.55-0.99	0.044
g__Mycobacterium	1.36	1.1-1.68	0.004
g__Nocardia	1.26	1.05-1.5	0.013
g__Frankia	1.23	1.02-1.49	0.034
g__Paeniglutamicibacter	1.29	1.09-1.52	0.003
g__Streptomyces	1.15	0.97-1.36	0.106
g__Slackia	0.87	0.72-1.06	0.171
g__Barnesiella	0.57	0.32-1	0.05
g__Dysgonomonas	0.6	0.33-1.09	0.096
g__Proteiniphilum	0.26	0.06-1.02	0.054
k__Bacteria_p__Bacteroidetes_c__Bacteroidia_o__Bacteroidales_f__Muribaculaceae_g__	0.13	0.02-0.71	0.019
g__Duncaniella	0.47	0.19-1.17	0.105
g__Muribaculum	0.31	0.11-0.85	0.024
g__Butyricimonas	0.69	0.47-0.99	0.043
g__Culturomica	0.52	0.32-0.84	0.008
g__Odoribacter	0.3	0.12-0.71	0.007
g__Paludibacter	0.2	0.06-0.67	0.009
g__Lascolabacillus	0.07	0.01-0.62	0.017
g__Massilibacteroides	0.26	0.07-0.92	0.037
g__Petrimonas	0.38	0.11-1.34	0.134
g__Porphyromonas	0.91	0.83-1	0.058
g__Sanguibacteroides	1.46	1.12-1.91	0.005
k__Bacteria_p__Bacteroidetes_c__Bacteroidia_o__Bacteroidales_f__Prevotellaceae_g__	0.89	0.77-1.03	0.108
g__Alloprevotella	0.86	0.77-0.96	0.008
g__Metaprevotella	0.79	0.58-1.06	0.109
g__Prevotella	0.91	0.84-0.99	0.021
g__Rikenella	0.61	0.32-1.17	0.135
g__Parabacteroides	0.81	0.63-1.03	0.084
g__Tannerella	0.84	0.73-0.97	0.017
g__Marinifilum	1.44	1.13-1.83	0.003
g__Riemerella	0.58	0.31-1.09	0.089
g__Zobellia	1.27	1.02-1.58	0.03
g__Pedobacter	1.38	1.11-1.72	0.004
g__Litorilinea	1.74	1.13-2.66	0.011
g__Aphanothece	1.54	1.19-1.99	0.001
g__Crocosphaera	1.84	1.31-2.6	0
g__Arthrospira	8.69855e+16	0.02-3.66414750439565e+35	0.075
g__Gemella	0.87	0.77-0.97	0.011
g__Cerasibacillus	1.45062e+16	0-9.35314160595949e+35	0.11
g__Gracilibacillus	0	0-7.99	0.152
g__Lysinibacillus	0.41	0.15-1.18	0.098
g__Terribacillus	0	0-7.89	0.149
g__Virgibacillus	1.28	1.04-1.58	0.018
g__Paenibacillus	1.29	1.03-1.6	0.024
g__Metasolibacillus	1.62	1.16-2.26	0.005
g__Salinicoccus	9.03642e+11	0-1.88928531504214e+28	0.151
g__Paludifilum	1.39	1.09-1.77	0.009
g__Aerococcus	0.72	0.45-1.14	0.165
g__Globicatella	0.7	0.43-1.16	0.167
g__Suicoccus	0.47	0.21-1.08	0.076
g__Vaginisenegalia	0.51	0.24-1.11	0.09
g__Atopostipes	0.56	0.25-1.24	0.153
g__Catellicoccus	0.13	0.01-1.41	0.094
g__Vagococcus	0.64	0.4-1.05	0.077
g__Anaerovirgula	0.11	0.01-1.69	0.114
g__Fenollaria	0.75	0.53-1.07	0.115
g__Neofamilia	0.65	0.4-1.07	0.094
g__Christensenella	0.37	0.1-1.31	0.123
g__Hathewaya	0.41	0.18-0.93	0.033
g__Paramaledivibacter	0.17	0.02-1.56	0.117
k__Bacteria_p__Firmicutes_c__Clostridia_o__Clostridiales_f__Clostridiales.Family.XIII..Incertae.Sedis_g__	0.77	0.67-0.9	0.001
g__Alterileibacterium	0.68	0.48-0.95	0.025
g__Aminipila	0.09	0.01-0.56	0.011
g__Emergencia	0.61	0.34-1.11	0.104
g__Mogibacterium	0.86	0.72-1.02	0.09
g__Defluviitalea	0.22	0.04-1.26	0.089
k__Bacteria_p__Firmicutes_c__Clostridia_o__Clostridiales_f__Eubacteriaceae_g__	0.5	0.2-1.28	0.151
g__Alkalibaculum	0.52	0.24-1.15	0.105
g__Aminicella	0.04	0-1.21	0.065
g__Eubacterium	1.36	1.03-1.79	0.03
g__Fastidiosipila	0.73	0.49-1.09	0.122
g__Anaerocolumna	0.29	0.07-1.2	0.088
g__Anaerostipes	0.67	0.39-1.14	0.141
g__Anaerotignum	0.62	0.33-1.16	0.136
g__Extibacter	0.37	0.1-1.42	0.148
g__Faecalicatena	0.63	0.34-1.16	0.135
g__Johnsonella	0.79	0.66-0.95	0.012
g__Lachnoanaerobaculum	0.89	0.81-0.98	0.023
g__Mediterraneibacter	0.64	0.41-1	0.048
g__Muricomes	0.32	0.1-0.99	0.048
g__Oribacterium	0.77	0.65-0.92	0.004
g__Roseburia	0.59	0.34-1	0.051
g__Shuttleworthia	0.85	0.67-1.07	0.162
g__Desulfofarcimen	0.16	0.01-2.1	0.164
g__Peptococcus	0.73	0.48-1.12	0.153
k__Bacteria_p__Firmicutes_c__Clostridia_o__Clostridiales_f__Peptostreptococcaceae_g__	0.34	0.08-1.41	0.136
g__Paeniclostridium	0.59	0.28-1.24	0.168
g__Peptostreptococcus	0.8	0.64-1	0.052
g__Romboutsia	0.67	0.39-1.17	0.158
g__Tepidibacter	0.58	0.26-1.28	0.179
g__Terrisporobacter	0.48	0.17-1.33	0.155
g__Angelakisella	2.67	0.85-8.37	0.092
g__Provencibacterium	3.3	0.68-16.06	0.139
g__Bulleidia	0.78	0.64-0.96	0.016
g__Dielma	0.31	0.08-1.14	0.078
g__Eggerthia	0.83	0.69-1	0.045
g__Faecalibacillus	0.57	0.25-1.31	0.185
g__Intestinibaculum	0.38	0.09-1.63	0.193
g__Longibaculum	0	0-1.84	0.064
g__Solobacterium	0.92	0.81-1.03	0.159
g__Anaerovibrio	0.31	0.08-1.18	0.086
g__Centipeda	0.79	0.62-1	0.054
g__Pectinatus	0.06	0-1.04	0.053
g__Schwartzia	0.28	0.05-1.61	0.155
g__Sporomusa	0.35	0.11-1.11	0.074
g__Anaeroglobus	0.77	0.57-1.03	0.08
g__Dialister	0.9	0.8-1.01	0.071
g__Megasphaera	0.86	0.72-1.02	0.092
g__Negativicoccus	0.52	0.26-1.04	0.063
k__Bacteria_p__Firmicutes_c__Tissierellia_o___f___g__	0.79	0.59-1.07	0.123
g__Ezakiella	0.66	0.43-0.99	0.043
g__Gottschalkia	0.47	0.15-1.49	0.198
g__Anaerococcus	0.85	0.72-1.01	0.066
g__Anaerosphaera	0.38	0.15-0.95	0.04
g__Finegoldia	0.79	0.61-1.02	0.072
g__Helcococcus	0.43	0.2-0.92	0.03
g__Miniphocibacter	0.44	0.21-0.91	0.027
g__Parvimonas	0.92	0.84-1.02	0.105
g__Peptoniphilus	0.82	0.7-0.96	0.012
g__Urinicoccus	0.73	0.55-0.97	0.032
g__Gudongella	0.27	0.05-1.4	0.119
g__Keratinibaculum	0.28	0.08-0.96	0.043
g__Cetobacterium	0.74	0.49-1.09	0.13
g__Fusobacterium	0.89	0.83-0.96	0.003
g__Leptotrichia	0.82	0.74-0.9	0
g__Oceanivirga	0.6	0.32-1.11	0.106
g__Sebaldella	0.32	0.14-0.74	0.008
g__Sneathia	0.72	0.52-1	0.053
g__Streptobacillus	0.61	0.39-0.95	0.028
g__Rhodoplanes	1.27	1.05-1.54	0.013
g__Hoeflea	1.34	1.04-1.74	0.026
g__Xanthobacter	1.3	1.01-1.66	0.041
g__Mangrovicoccus	1.15	0.96-1.38	0.14
g__Oceanibium	1.26	1.03-1.54	0.024
g__Puniceibacterium	1.76	0.76-4.08	0.19
g__Dankookia	1.56	1.03-2.38	0.037
g__Paracraurococcus	1.64	1.05-2.55	0.028
g__Anaplasma	267342462490793	0-7.43798567719383e+35	0.187
g__Rubrivivax	0.73	0.53-1.02	0.062
g__Saezia	1.15	0.96-1.37	0.125
g__Eikenella	0.88	0.77-1	0.058
g__Simonsiella	0.37	0.2-0.67	0.001
g__Corallococcus	1.27	1.03-1.57	0.023
k__Bacteria_p__Proteobacteria_c__Epsilonproteobacteria_o__Campylobacterales_f__Campylobacteraceae_g__	0.8	0.66-0.97	0.025
g__Arcobacter	1.27	1.05-1.53	0.012
k__Bacteria_p__Proteobacteria_c__Gammaproteobacteria_o___f___g__	1.35	1.06-1.72	0.014
g__Catenovulum	0	0-0.8	0.041
g__Idiomarina	1.31	1.09-1.59	0.005
g__Moritella	0	0-1.33	0.055
g__Cardiobacterium	0.54	0.35-0.83	0.005
g__Kushneria	1.54	1.13-2.09	0.006
k__Bacteria_p__Proteobacteria_c__Gammaproteobacteria_o__Pasteurellales_f__Pasteurellaceae_g__	0.59	0.39-0.87	0.009
g__Actinobacillus	0.65	0.49-0.86	0.003
g__Aggregatibacter	0.8	0.7-0.92	0.002
g__Avibacterium	0.53	0.32-0.88	0.013
g__Basfia	0.39	0.19-0.78	0.008
g__Bibersteinia	0.28	0.12-0.62	0.002
g__Bisgaardia	0.54	0.23-1.26	0.155
g__Caviibacterium	0.35	0.15-0.82	0.016
g__Chelonobacter	0.33	0.07-1.52	0.156
g__Conservatibacter	0.39	0.16-0.95	0.037
g__Cricetibacter	0.3	0.11-0.84	0.023
g__Frederiksenia	0.38	0.16-0.91	0.031
g__Gallibacterium	0.67	0.43-1.04	0.077
g__Haemophilus	0.82	0.73-0.92	0.001
g__Histophilus	0.45	0.27-0.77	0.003
g__Lonepinella	0.37	0.15-0.89	0.027
g__Mannheimia	0.56	0.37-0.86	0.008
g__Muribacter	0.34	0.1-1.16	0.085
g__Nicoletella	0.09	0.01-0.72	0.023
g__Pasteurella	0.59	0.41-0.87	0.007
g__Phocoenobacter	0.33	0.13-0.84	0.02
g__Rodentibacter	0.68	0.52-0.89	0.004
g__Testudinibacter	0.09	0.01-0.9	0.041
g__Ursidibacter	0.42	0.2-0.88	0.021
g__Vespertiliibacter	0.41	0.15-1.12	0.082
g__Acinetobacter	1.23	1.03-1.46	0.02
g__Thioflexothrix	1.44	0.89-2.31	0.134
g__Photobacterium	0.62	0.32-1.21	0.163
g__Salinivibrio	0	0-5428445.08	0.192
g__Vibrio	1.14	0.97-1.34	0.1
g__Brachyspira	0.5	0.2-1.23	0.129
g__Treponema	0.92	0.85-0.99	0.03
g__Acholeplasma	0.15	0.02-0.95	0.044
g__Mycoplasma	0.8	0.7-0.93	0.003
g__Ureaplasma	0.5	0.21-1.19	0.118
g__Oceanotoga	0.19	0.03-1.4	0.103
g__Aspergillus	1.72	1.21-2.45	0.002
g__Histoplasma	1.42	0.92-2.19	0.113
g__Amorphotheca	1.4	0.95-2.06	0.085
g__Colletotrichum	1.49	1.06-2.11	0.024
g__Trichoderma	1.69	1.12-2.53	0.012
g__Pyricularia	1.88	1.21-2.92	0.005
g__Jaminaea	1.43	0.97-2.1	0.07
g__Malassezia	1.29	1.06-1.57	0.012
g__Cryptococcus	1.84	1.21-2.78	0.004

## Sheet: KICH
characteristics	Hazard.Ratio	CI95	P.Value
g__Gleimia	13.6	1.44-128.08	0.023
g__Yimella	23.3	4.11-132.21	0
g__Janibacter	0.22	0.02-2.2	0.198
g__Segeticoccus	4.14	0.78-21.92	0.095
g__Kocuria	0.4	0.13-1.22	0.107
g__Micrococcus	0.35	0.12-1.04	0.06
g__Actinophytocola	33.46	1.45-770.54	0.028
g__Actinocorallia	19.71	0.46-850.88	0.121
g__Thermomonospora	21.09	1.94-229.36	0.012
g__Bacteroides	2.44	1.4-4.28	0.002
g__Alistipes	2.79	1.66-4.71	0
g__Parabacteroides	5.21	1.57-17.29	0.007
g__Tannerella	5.49	0.67-45.13	0.113
g__Lunatimonas	17.21	0.7-425.95	0.082
g__Capnocytophaga	0.36	0.09-1.48	0.157
k__Bacteria_p__Firmicutes_c__Bacilli_o__Lactobacillales_f__Streptococcaceae_g__	0.16	0.02-1.36	0.094
g__Lactococcus	0.27	0.05-1.33	0.108
g__Dorea	34.08	2.99-388.96	0.005
g__Mediterraneibacter	9.48	0.84-107.12	0.069
k__Bacteria_p__Firmicutes_c__Clostridia_o__Clostridiales_f__Ruminococcaceae_g__	3.58	1.21-10.6	0.021
g__Ruminococcus	3.22	1.43-7.25	0.005
g__Carboxydothermus	22.22	0.65-757.7	0.085
g__Dialister	3.82	1.78-8.21	0.001
g__Ochrobactrum	0.81	0.6-1.1	0.173
g__Pleomorphomonas	13.97	0.4-488.97	0.146
g__Shinella	0.19	0.02-1.85	0.151
g__Xanthobacter	0.55	0.26-1.15	0.112
g__Thalassobacter	10.94	0.33-365.92	0.182
g__Thalassococcus	423.91	11.99-14985.57	0.001
g__Piscinibacter	25.94	3.53-190.51	0.001
g__Bordetella	0.29	0.04-1.93	0.199
g__Caballeronia	3.55	0.75-16.84	0.111
g__Acidovorax	0.53	0.23-1.26	0.152
g__Delftia	0.35	0.1-1.24	0.104
g__Limnohabitans	8.72	1.32-57.35	0.024
g__Pseudacidovorax	0.01	0-3.45	0.122
g__Neisseria	0.27	0.08-0.92	0.036
g__Zobellella	9.64	0.64-144.64	0.101
g__Rappaport	6.07	1.12-33.02	0.037
g__Phytobacter	1.7	0.85-3.41	0.132
g__Atlantibacter	1.73	0.89-3.36	0.107
g__Cedecea	6.63	1.07-40.97	0.042
g__Citrobacter	1.59	0.86-2.93	0.14
g__Cronobacter	1.64	0.9-3.01	0.109
g__Edaphovirga	7.04	0.53-92.87	0.138
g__Escherichia	1.71	0.77-3.8	0.188
g__Franconibacter	4.52	0.88-23.3	0.072
g__Klebsiella	1.63	0.89-3	0.112
g__Kluyvera	1.66	0.93-2.94	0.085
g__Kosakonia	1.58	0.89-2.79	0.117
g__Leclercia	4.52	0.59-34.87	0.148
g__Lelliottia	3.11	0.61-15.86	0.173
g__Metakosakonia	4.63	0.48-44.38	0.184
g__Pluralibacter	4.94	0.8-30.58	0.086
g__Raoultella	1.64	0.87-3.08	0.127
g__Salmonella	3.13	0.79-12.38	0.104
g__Siccibacter	4.17	1.1-15.87	0.036
g__Yokenella	5.18	0.53-50.92	0.158
g__Kalamiella	2.21	0.89-5.49	0.089
g__Mixta	5.18	0.72-37.48	0.103
g__Pantoea	2.03	0.83-4.97	0.121
g__Tatumella	6.31	1-39.95	0.05
g__Edwardsiella	3.45	0.73-16.44	0.119
g__Hafnia	4.72	0.47-47.39	0.187
g__Obesumbacterium	1.66	0.85-3.26	0.138
g__Arsenophonus	10.49	0.43-257.45	0.15
g__Morganella	5.27	0.99-28.09	0.051
g__Photorhabdus	5.17	0.45-59.94	0.189
g__Proteus	5.79	0.95-35.36	0.057
g__Providencia	9.54	0.64-142.25	0.102
g__Brenneria	4.59	0.63-33.25	0.132
g__Chania	7.38	0.55-98.84	0.131
g__Chimaeribacter	8.11	1.14-57.86	0.037
g__Nissabacter	6.1	0.95-39.33	0.057
g__Rahnella	1.95	0.79-4.81	0.149
g__Yersinia	1.6	0.91-2.81	0.102
g__Methylotetracoccus	27.94	1.01-769.27	0.049
g__Frischella	5.33	0.8-35.32	0.083
g__Gilliamella	5.21	0.76-35.88	0.094
g__Actinobacillus	3.52	1.08-11.44	0.036
g__Aggregatibacter	0.25	0.03-2.04	0.196
g__Gallibacterium	5.36	1.2-23.92	0.028
g__Necropsobacter	7.31	0.68-78.31	0.1
g__Aliivibrio	6.48	0.38-109.74	0.196
g__Grimontia	2.08	0.72-5.98	0.175
g__Stenotrophomonas	0.47	0.21-1.08	0.075
g__Akkermansia	4.5	0.78-25.9	0.092
g__Exophiala	49.21	2.85-849.66	0.007
g__Moesziomyces	2.07	0.88-4.88	0.095

## Sheet: KIRC
characteristics	Hazard.Ratio	CI95	P.Value
g__Bryocella	0	0-7.53	0.114
g__Mobiluncus	2.29	0.96-5.46	0.061
g__Stackebrandtia	4.69	0.95-23.03	0.057
g__Kineococcus	1.55	0.81-2.94	0.183
g__Luteimicrobium	1.66	0.83-3.35	0.154
g__Knoellia	1.5	0.88-2.55	0.139
g__Agreia	3.21	0.94-10.95	0.063
g__Frondihabitans	3.59	0.98-13.21	0.054
g__Glaciibacter	3.5	1.11-11.02	0.032
g__Herbiconiux	1.97	0.79-4.88	0.144
g__Labedella	1.69	0.97-2.94	0.062
g__Microcella	1.99	0.8-4.99	0.141
g__Microterricola	2.25	0.81-6.26	0.119
g__Mycetocola	1.94	0.85-4.43	0.118
g__Plantibacter	1.83	0.84-3.98	0.127
g__Rhodoglobus	4.45	0.5-39.52	0.18
g__Isoptericola	1.36	0.87-2.13	0.177
g__Krasilnikoviella	3.53	0.81-15.45	0.094
g__Promicromonospora	1.69	0.8-3.54	0.168
g__Rarobacter	1.55	0.8-3.03	0.197
g__Haloactinobacterium	1.69	0.83-3.44	0.146
g__Actinoplanes	1.22	0.98-1.52	0.073
g__Asanoa	3.19	0.96-10.65	0.059
g__Catenuloplanes	8.59	0.62-118.62	0.109
g__Couchioplanes	1.88	0.98-3.58	0.057
g__Jishengella	32.85	1.6-675.09	0.024
g__Krasilnikovia	1.94	1.02-3.69	0.045
g__Pseudosporangium	1.58	0.89-2.8	0.121
g__Salinispora	2.48	1.02-6	0.045
g__Verrucosispora	8.3	1.62-42.52	0.011
g__Aeromicrobium	1.43	1.03-1.98	0.033
g__Kribbella	1.37	0.86-2.19	0.188
g__Mumia	3.18	0.81-12.46	0.097
g__Alloactinosynnema	5.23	0.87-31.53	0.071
g__Lentzea	2.06	0.69-6.16	0.197
g__Prauserella	1.89	0.74-4.79	0.182
g__Streptomonospora	0	0-7.31	0.089
g__Microbispora	0	0-5.85	0.077
k__Bacteria_p__Bacteroidetes_c__Bacteroidia_o__Bacteroidales_f__Dysgonamonadaceae_g__	0.46	0.16-1.3	0.143
g__Chryseolinea	2.91	0.88-9.66	0.08
g__Algoriella	1.62	0.86-3.02	0.132
g__Cellulophaga	163.18	4-6660.6	0.007
g__Empedobacter	1.19	0.92-1.55	0.19
g__Gelidibacter	4.73	0.91-24.45	0.064
g__Nonlabens	10.6	1.06-106.44	0.045
g__Salegentibacter	6.35	0.51-78.67	0.15
g__Pelobium	5.94	0.86-40.99	0.071
g__Thermosporothrix	3	0.67-13.39	0.151
g__Melghiribacillus	0	0-8.76	0.089
g__Heliorestis	18.56	1.16-297.17	0.039
g__Desulfofundulus	0.43	0.13-1.51	0.19
g__Polymorphum	28.57	1.39-587.69	0.03
g__Henriciella	0.01	0-3.66	0.131
g__Limimonas	0	0-10.48	0.172
g__Paenalcaligenes	6.21	1.43-27.07	0.015
g__Parvibium	4.86	0.54-43.62	0.158
g__Taylorella	16.89	1.28-223.33	0.032
g__Ephemeroptericola	4.62	1.06-20.18	0.042
g__Mycoavidus	4.47	0.51-38.8	0.174
g__Pandoraea	1.21	0.95-1.54	0.119
g__Paucimonas	1.71	1.04-2.83	0.036
g__Polynucleobacter	1.53	0.89-2.64	0.124
g__Trinickia	2.54	1.21-5.32	0.014
g__Collimonas	1.3	1-1.68	0.051
g__Duganella	1.27	1.06-1.53	0.009
g__Herbaspirillum	1.21	1.06-1.39	0.006
g__Herminiimonas	1.39	1.04-1.85	0.028
g__Lacisediminimonas	1.92	1.22-3.02	0.005
g__Noviherbaspirillum	1.33	1.05-1.7	0.019
g__Oxalobacter	3.91	1.95-7.84	0
g__Pseudoduganella	1.26	0.99-1.62	0.062
g__Sapientia	4.02	1.76-9.17	0.001
g__Solimicrobium	2.68	1.42-5.04	0.002
g__Undibacterium	1.66	1.2-2.29	0.002
g__Sutterella	1.73	0.83-3.62	0.146
g__Aquitalea	2.22	0.72-6.84	0.167
g__Chitinilyticum	2.41	1.29-4.51	0.006
g__Iodobacter	2.7	1.2-6.11	0.017
g__Ferriphaselus	9.7	1.99-47.14	0.005
g__Gallionella	7.63	1.52-38.24	0.013
g__Sulfuricella	10.6	0.29-385.02	0.198
g__Methylobacillus	2.62	1.03-6.67	0.043
g__Methylophilus	2.26	1.38-3.71	0.001
g__Methylotenera	2.06	1-4.27	0.051
g__Methylovorus	8.85	2.2-35.59	0.002
g__Nitrosospira	6.6	2.5-17.38	0
g__Nitrosovibrio	232.4	7.89-6844.54	0.002
g__Sulfuritortus	0.22	0.03-1.39	0.106
g__Uliginosibacterium	0.05	0-3.71	0.169
g__Desulfovibrio	1.45	0.88-2.39	0.146
g__Cystobacter	6.15	1.08-34.85	0.04
g__Melittangium	5.47	1.29-23.15	0.021
g__Labilithrix	1.48	0.97-2.26	0.072
g__Myxococcus	4.84	1.57-14.95	0.006
g__Plesiocystis	1.73	0.76-3.94	0.19
g__Chondromyces	1.3	0.87-1.96	0.199
g__Ignatzschineria	3.6	0.74-17.46	0.112
g__Wohlfahrtiimonas	7.04	0.57-86.72	0.128
g__Thiohalocapsa	0.01	0-3.08	0.119
g__Sulfurivermis	5.19	0.79-33.99	0.086
g__Fluoribacter	12.56	0.5-316.29	0.124
g__Methylomagnum	2.42	1.01-5.81	0.048
g__Polycyclovorans	4.81	1.21-19.08	0.025
g__Sinimarinibacterium	0.23	0.03-1.68	0.148
g__Lacunisphaera	7.24	0.92-57.22	0.061
g__Nibricoccus	2.88	0.67-12.43	0.156
g__Opitutus	6.03	0.79-46.25	0.084
g__Rariglobus	5.01	1.32-19.06	0.018

## Sheet: KIRP
characteristics	Hazard.Ratio	CI95	P.Value
g__Bifidobacterium	1.15	0.95-1.4	0.152
g__Gardnerella	3.89	0.64-23.56	0.14
g__Dietzia	0.23	0.04-1.48	0.121
g__Mycobacteroides	0.12	0.01-1.11	0.061
g__Mycolicibacterium	1.91	1.32-2.75	0.001
g__Nocardia	0.81	0.6-1.09	0.171
g__Blastococcus	0.09	0-3.18	0.184
g__Dermabacter	11.35	0.84-153.8	0.068
g__Microbacterium	0.06	0-3.29	0.171
g__Paenarthrobacter	0.81	0.6-1.11	0.186
g__Nakamurella	4.38	0.94-20.42	0.06
g__Streptomyces	0.64	0.47-0.87	0.005
g__Sanguibacteroides	0.78	0.61-1	0.051
g__Flammeovirga	119.15	7.87-1802.99	0.001
g__Hymenobacter	0.56	0.24-1.32	0.187
g__Marixanthomonas	111.86	4.44-2819.06	0.004
g__Weeksella	0.01	0-12.59	0.19
g__Deinococcus	0.55	0.28-1.07	0.078
g__Paludifilum	0.61	0.45-0.82	0.001
g__Enterococcus	0.32	0.08-1.37	0.125
g__Levyella	45.55	5.9-351.93	0
g__Eubacterium	0.33	0.07-1.6	0.168
g__Heliobacterium	0.04	0-3.11	0.144
g__Mageeibacillus	166.6	7.61-3646.19	0.001
g__Anaerobutyricum	2.01	1.35-2.98	0.001
g__Acetanaerobacterium	2.51	1.42-4.42	0.001
g__Caldicellulosiruptor	1.42	0.86-2.36	0.169
g__Catenibacterium	2	1.35-2.96	0.001
g__Sneathia	3.84	1.56-9.44	0.003
g__Bradyrhizobium	0.88	0.73-1.07	0.197
g__Pelagibacterium	501.01	17.58-14281.78	0
g__Rhodomicrobium	2.05	1.19-3.54	0.01
g__Ensifer	73.81	8.97-607.64	0
g__Mangrovicoccus	0.53	0.23-1.22	0.136
g__Acetobacter	2.05	1.38-3.05	0
g__Roseomonas	0.4	0.12-1.29	0.124
g__Sphingomonas	0.25	0.08-0.82	0.022
g__Rubrivivax	129.33	3.93-4253.63	0.006
g__Saezia	0.79	0.62-1	0.053
g__Tepidimonas	0.08	0.01-1.23	0.071
g__Bordetella	3.43	1.12-10.49	0.031
g__Orrella	11.28	0.51-250.38	0.126
k__Bacteria_p__Proteobacteria_c__Gammaproteobacteria_o___f___g__	0.37	0.15-0.93	0.034
g__Colwellia	0.76	0.54-1.06	0.107
g__Idiomarina	1.23	1.03-1.48	0.022
g__Congregibacter	62.97	2.81-1413.64	0.009
g__Parahaliea	58.14	2.7-1250.24	0.009
g__Shimwellia	102.5	0.61-17185.09	0.076
g__Edwardsiella	0.28	0.05-1.68	0.163
g__Pectobacterium	0.21	0.03-1.6	0.131
g__Chania	0.01	0-2.21	0.091
g__Steroidobacter	17.69	1.02-307.13	0.049
g__Alcanivorax	1.18	0.98-1.42	0.085
g__Kushneria	0.57	0.27-1.2	0.139
g__Kangiella	0.13	0.01-2.49	0.175
g__Haemophilus	7.42	0.62-89.32	0.114
g__Pseudoxanthomonas	0.68	0.48-0.98	0.036
g__Thermomonas	10.99	0.33-369.47	0.181
g__Diplodia	66.86	2.95-1517.26	0.008
g__Pochonia	1.54	0.95-2.51	0.08
g__Scedosporium	1.68	1.07-2.65	0.024
g__Podospora	1.68	1.03-2.72	0.037
g__Sordaria	0.14	0.01-2.56	0.183
g__Stereum	13.69	1.1-170.79	0.042
g__Acaromyces	1.67	1.01-2.77	0.045

[truncated: 8 more sheets: LUAD, LUSC, OV, PRAD, READ, STAD, THCA, UCEC]
