# Supplementary material for: Weighted gene coexpression network analysis and machine learning reveal oncogenome associated microbiome plays an important role in tumor immunity and prognosis in pan-cancer
Source: J Transl Med. 2023 Aug 12;21:537. doi: 10.1186/s12967-023-04411-0 (PMC10422781; doi:10.1186/s12967-023-04411-0)
Supplement: Supplementary file 11 — Additional file 11: Table S7. Univariate Cox analysis of the tumor mRNA. mRNA: messenger ribonucleic acid. [file 12967_2023_4411_MOESM11_ESM.xlsx]

## Sheet: BLCA
characteristics	Hazard.Ratio	CI95	P.Value
A2ML1	1.04	0.99-1.1	0.137
ABCA12	1.07	0.99-1.16	0.099
ABCB10	1.26	0.98-1.61	0.074
ABCC1	1.21	1.01-1.44	0.04
ABCE1	1.24	0.96-1.62	0.105
ABHD10	0.74	0.53-1.04	0.084
ABHD14A	0.88	0.74-1.04	0.134
ABHD14B	0.87	0.73-1.04	0.135
ABTB1	0.79	0.65-0.97	0.022
AC131263.1	1.64	0.93-2.88	0.086
AC253572.1	1.17	0.94-1.46	0.17
ACACA	1.2	0.97-1.48	0.085
ACADS	0.68	0.54-0.85	0.001
ACBD3	1.29	0.98-1.7	0.069
ACLY	1.42	1.1-1.82	0.006
ADAM17	1.24	1.06-1.46	0.009
ADAMTSL5	1.13	1-1.28	0.049
ADAP1	0.85	0.75-0.96	0.011
ADAT1	1.19	0.93-1.52	0.179
ADCY3	1.26	1.06-1.51	0.011
ADIPOR1	1.31	0.92-1.86	0.135
AF131216.1	0.39	0.11-1.47	0.166
AGA	1.19	0.94-1.52	0.147
AGAP1	1.24	1.01-1.52	0.042
AGFG1	1.27	1.03-1.57	0.024
AGO1	1.25	0.96-1.63	0.094
AGPS	1.3	1.01-1.68	0.046
AHCYL1	1.31	0.99-1.72	0.055
AHNAK	1.39	1.19-1.61	0
AIDA	1.19	0.94-1.51	0.147
AIFM2	0.8	0.66-0.96	0.018
AKAP13	1.2	0.97-1.48	0.086
AKIRIN1	1.17	0.92-1.49	0.195
ALDH3A2	1.1	0.96-1.27	0.176
AMD1	1.19	0.93-1.52	0.161
ANXA7	1.3	0.98-1.72	0.072
AP2B1	1.24	0.97-1.59	0.086
AP3B1	1.31	0.97-1.79	0.083
AP4E1	1.39	1.06-1.82	0.017
APC2	1.23	1.03-1.47	0.023
APIP	0.82	0.65-1.05	0.116
APLP2	1.3	1.04-1.62	0.024
APP	1.26	1.04-1.53	0.018
AQP8	0.34	0.09-1.29	0.113
ARCN1	1.72	1.22-2.42	0.002
ARHGAP21	1.22	1.01-1.48	0.037
ARHGAP35	1.14	0.93-1.39	0.197
ARHGEF26	1.15	1.02-1.29	0.024
ARL13B	1.19	0.97-1.47	0.096
ARL14EP	0.77	0.57-1.05	0.095
ARPC3	0.64	0.47-0.88	0.006
ARPIN	1.21	0.97-1.5	0.095
ARRDC1	0.78	0.63-0.95	0.014
ARRDC2	0.68	0.56-0.83	0
ARSK	1.42	1.1-1.82	0.007
ASAP1	1.3	1.09-1.54	0.003
ASAP2	1.13	0.99-1.28	0.076
ASCC1	1.36	1.03-1.78	0.028
ASCC3	1.22	1-1.49	0.048
ATF6B	0.78	0.59-1.02	0.074
ATG4B	0.63	0.46-0.86	0.003
ATL1	1.16	0.98-1.37	0.083
ATP10D	1.13	0.98-1.31	0.089
ATP11A	1.18	1.04-1.35	0.011
ATP11C	0.83	0.66-1.04	0.108
ATP1A1	1.32	1.08-1.6	0.006
ATP2B4	1.2	1.05-1.37	0.009
ATP5EP2	0.67	0.42-1.09	0.105
ATP5L	0.75	0.55-1.02	0.064
ATP6AP2	0.75	0.56-1.01	0.06
ATP6V1A	1.37	1.04-1.79	0.025
ATRN	1.23	0.98-1.56	0.08
AUP1	0.77	0.57-1.04	0.086
AZI2	1.42	1.11-1.83	0.006
B3GALNT2	1.23	1.02-1.48	0.034
B3GALT4	0.89	0.75-1.06	0.183
B3GNT5	1.1	0.96-1.26	0.179
B4GALT5	1.15	0.95-1.38	0.152
B9D2	0.69	0.54-0.89	0.005
BATF	0.82	0.73-0.92	0.001
BCORL1	1.25	1.02-1.55	0.033
BFAR	1.42	1.01-1.99	0.046
BICD1	1.14	0.95-1.36	0.164
BLOC1S4	0.74	0.57-0.97	0.029
BLOC1S6	1.33	0.98-1.79	0.065
BTBD1	1.27	0.89-1.81	0.187
C16orf62	1.15	0.96-1.37	0.14
C16orf74	0.87	0.79-0.96	0.006
C17orf59	0.76	0.56-1.02	0.069
C17orf62	0.76	0.57-1	0.052
C18orf65	1.83	0.92-3.64	0.084
C19orf18	0.69	0.54-0.87	0.002
C1orf131	0.66	0.48-0.92	0.013
C1orf174	0.72	0.51-1.02	0.064
C1orf233	1.08	0.96-1.22	0.179
C21orf91	0.85	0.71-1.02	0.078
C4orf48	0.91	0.79-1.05	0.191
C6orf120	1.33	1.04-1.72	0.025
C6orf203	0.65	0.5-0.84	0.001
C6orf89	1.29	0.92-1.8	0.142
C7orf55	0.83	0.68-1.02	0.077
C8G	0.78	0.58-1.06	0.109
C8orf59	0.69	0.52-0.92	0.012
C9orf16	0.78	0.65-0.94	0.009
CABYR	1.08	0.96-1.22	0.197
CAMK2D	1.13	0.96-1.33	0.156
CARM1	1.55	1.12-2.14	0.008
CAST	1.32	1.09-1.6	0.004
CBWD2	0.82	0.61-1.1	0.189
CCDC101	0.82	0.66-1.02	0.072
CCDC12	0.83	0.66-1.06	0.131
CCDC6	1.19	0.92-1.54	0.182
CCDC85C	1.2	1-1.43	0.045
CCDC88C	0.88	0.74-1.05	0.157
CCDC96	0.78	0.59-1.03	0.077
CCNC	1.19	0.92-1.54	0.191
CCNY	1.23	0.9-1.68	0.199
CCNYL1	1.26	1.06-1.5	0.008
CCSER2	1.24	0.97-1.6	0.092
CDC42SE2	0.86	0.69-1.07	0.176
CDC73	1.5	1.15-1.94	0.003
CDKL1	1.46	1.09-1.94	0.011
CDYL2	0.83	0.72-0.95	0.006
CEBPG	0.76	0.59-1	0.046
CEBPZ	1.3	0.96-1.77	0.093
CELSR1	1.09	0.99-1.2	0.075
CENPBD1	1.21	0.97-1.52	0.087
CEP170	1.19	0.98-1.43	0.076
CFAP97	1.2	0.95-1.53	0.125
CH507_9B2.9	0.63	0.45-0.87	0.005
CHL1	1.1	1.01-1.18	0.02
CHM	1.24	0.97-1.58	0.09
CIB1	0.75	0.61-0.92	0.005
CIR1	0.52	0.36-0.76	0.001
CISD3	0.84	0.7-1.01	0.061
CLCN5	1.15	0.96-1.37	0.126
CLDND2	0.81	0.62-1.06	0.126
CLTC	1.49	1.15-1.93	0.003
CMTM7	0.9	0.78-1.03	0.126
CMTR1	0.78	0.58-1.04	0.092
CNOT1	1.18	0.96-1.46	0.108
CNPPD1	0.78	0.57-1.05	0.103
COA3	0.8	0.59-1.07	0.137
COPB1	1.29	0.95-1.75	0.099
COPB2	1.26	0.93-1.71	0.133
COPS2	1.45	1.02-2.05	0.038
CORO7	0.86	0.68-1.08	0.195
COX14	0.67	0.52-0.87	0.003
COX6A1	0.74	0.57-0.96	0.021
COX6C	0.73	0.59-0.9	0.004
COX7A2	0.83	0.63-1.09	0.175
CPT1A	1.13	0.99-1.29	0.067
CRADD	1.2	0.92-1.57	0.181
CSDE1	1.29	0.95-1.75	0.104
CSNK1A1	1.15	0.94-1.39	0.165
CST3	0.82	0.69-0.96	0.013
CTDSPL	1.21	0.99-1.48	0.057
CTNNB1	1.25	0.98-1.59	0.076
CUL1	1.51	1.08-2.12	0.016
CWC27	1.3	0.94-1.79	0.114
CYFIP1	1.38	1.03-1.84	0.03
CYP51A1	1.32	1.11-1.58	0.002
DAGLA	1.19	1.03-1.37	0.016
DAZAP2	0.7	0.53-0.92	0.011
DDB1	1.77	1.29-2.43	0
DDX1	1.41	1.03-1.95	0.034
DDX21	1.24	1.03-1.5	0.024
DDX46	1.31	1-1.72	0.052
DDX50	1.25	0.91-1.73	0.17
DEF6	0.78	0.65-0.94	0.008
DENND2C	1.09	0.96-1.23	0.185
DGCR14	0.7	0.49-0.98	0.041
DGUOK	0.63	0.46-0.85	0.003
DIP2B	1.18	0.98-1.43	0.084
DLAT	1.33	1.02-1.75	0.038
DNAJB2	0.77	0.6-0.99	0.039
DNAJC5	1.2	0.96-1.51	0.106
DPAGT1	1.23	0.92-1.64	0.17
DSCR3	1.23	0.93-1.63	0.155
DSP	1.09	1-1.18	0.049
DSTYK	1.42	1.1-1.83	0.007
DYM	1.83	1.39-2.41	0
ECD	1.29	0.94-1.78	0.115
ECHS1	0.82	0.66-1.02	0.076
EFNB2	1.16	1.02-1.31	0.022
EFR3A	1.19	0.95-1.5	0.124
EGF	1.24	1.07-1.44	0.004
EGFR	1.18	1.08-1.28	0
EHBP1	1.6	1.31-1.95	0
EIF2AK4	1.62	1.19-2.21	0.002
EIF3A	1.27	1-1.6	0.051
EIF3C	1.45	1.14-1.84	0.002
EIF3J	1.58	1.14-2.19	0.006
EIF4H	1.37	0.99-1.9	0.06
ENAH	1.15	0.97-1.36	0.111
EPN2	1.46	1.18-1.8	0
EPRS	1.51	1.18-1.94	0.001
EPT1	1.19	0.96-1.49	0.111
ERC1	1.33	1.1-1.61	0.003
ERCC4	1.27	1-1.63	0.05
ERCC8	1.31	0.92-1.86	0.131
ERLEC1	1.31	0.95-1.8	0.101
ESF1	1.19	0.92-1.52	0.185
ESYT2	1.44	1.16-1.78	0.001
ETF1	1.51	1.13-2.03	0.005
EXD3	0.86	0.7-1.04	0.126
FAM109A	0.76	0.61-0.96	0.019
FAM166B	0.37	0.23-0.59	0
FAM168A	1.33	1.06-1.68	0.015
FAM168B	1.27	1.02-1.59	0.033
FAM209B	0.31	0.14-0.7	0.005
FAM212A	0.88	0.77-1	0.054
FAM217B	1.3	1.03-1.62	0.024
FAM21C	0.81	0.59-1.11	0.182
FAM3C	1.17	0.99-1.38	0.061
FAM46A	1.12	0.95-1.32	0.169
FAM71D	0.27	0.09-0.82	0.021
FASTKD5	0.8	0.61-1.05	0.103
FBXL18	1.2	0.99-1.45	0.059
FBXW11	1.22	0.92-1.63	0.172
FECH	1.27	1.02-1.57	0.031
FER	1.26	1.04-1.53	0.018
FGD4	1.17	0.99-1.38	0.073
FGF11	1.19	1.01-1.4	0.039
FITM2	1.18	0.97-1.43	0.106
FLG	1.17	1.06-1.29	0.003
FNDC3B	1.16	0.96-1.4	0.115
FOCAD	1.21	1.03-1.42	0.021
FOPNL	1.43	1.1-1.85	0.007
FOXJ2	1.2	0.95-1.5	0.12
FOXO3	1.22	0.99-1.51	0.068
FSTL5	1.12	0.98-1.28	0.09
FTO	1.35	1.04-1.74	0.022
FUT8	0.83	0.7-0.98	0.029
G3BP1	1.25	0.96-1.64	0.1
GABRQ	1.08	0.99-1.18	0.076
GAMT	1.11	1-1.25	0.056
GATSL2	1.26	0.95-1.66	0.111
GBE1	1.26	1.04-1.53	0.019
GBF1	1.32	0.94-1.85	0.104
GCA	0.84	0.7-1	0.052
GCLM	1.2	1.07-1.36	0.002
GEMIN5	1.42	1.07-1.89	0.016
GGPS1	0.64	0.43-0.95	0.025
GJA1	1.17	1.07-1.29	0.001
GLCE	1.31	1.09-1.58	0.004
GLTPD2	1.23	0.92-1.64	0.166
GLYCTK	0.72	0.59-0.89	0.002
GMEB1	0.74	0.52-1.06	0.103
GNAI3	1.29	0.98-1.69	0.07
GNB5	1.17	0.94-1.46	0.166
GOLGA5	1.3	0.94-1.78	0.112
GOLT1B	1.21	0.93-1.56	0.159
GPR180	1.19	0.94-1.49	0.142
GPR63	1.24	1.01-1.51	0.036
GPRASP2	1.28	1.07-1.52	0.006
GRAMD4	1.12	0.95-1.32	0.16
GRIK2	1.48	1.21-1.8	0
GSTA4	1.1	0.98-1.22	0.108
GSTK1	0.78	0.62-0.98	0.032
GTF2H5	0.7	0.53-0.94	0.019
GTF3C1	1.27	0.93-1.73	0.129
GTPBP1	0.81	0.6-1.09	0.159
GYLTL1B	1.06	0.98-1.16	0.155
H2AFJ	0.8	0.69-0.92	0.003
HAUS2	1.53	1.16-2	0.002
HAUS7	0.76	0.6-0.97	0.026
HBS1L	1.24	0.98-1.58	0.079
HEATR1	1.19	0.95-1.48	0.122
HEATR5A	1.19	0.94-1.51	0.143
HERC3	1.16	0.99-1.36	0.066
HERPUD2	1.4	0.94-2.09	0.101
HES4	0.87	0.78-0.97	0.013
HIAT1	1.27	0.96-1.67	0.088
HIF1A	1.15	0.98-1.34	0.08
HIPK2	1.2	1.03-1.38	0.017
HIPK3	1.28	1.04-1.58	0.02
HMGCR	1.16	0.96-1.41	0.133
HMGN4	0.8	0.63-1	0.052
HOMER2	1.16	1.04-1.31	0.009
HOXD8	1.13	0.97-1.31	0.122
HPS1	0.8	0.6-1.06	0.119
HRNR	1.31	1.02-1.69	0.034
HSD17B12	1.18	0.92-1.53	0.188
HSPA13	1.21	1-1.46	0.048
HSPA4L	1.13	1.03-1.25	0.012
HYOU1	1.27	1.03-1.57	0.026
IARS2	1.36	1.06-1.76	0.016
IDH3A	1.24	0.98-1.57	0.073
IGF1R	1.12	0.97-1.29	0.138
IGF2R	1.38	1.12-1.71	0.003
IGSF1	0.9	0.78-1.04	0.158
IMPACT	1.21	0.97-1.52	0.097
INSIG1	1.13	0.99-1.29	0.065
INSL3	0.39	0.24-0.63	0
IPMK	1.22	1-1.5	0.049
IPO11	1.42	1.08-1.87	0.012
IPO7	1.28	1.02-1.6	0.032
IQGAP1	1.4	1.1-1.76	0.005
ITFG1	1.33	1.04-1.7	0.021
ITGB8	1.1	1-1.2	0.044
ITSN1	1.29	1.03-1.62	0.026
KCNN4	0.88	0.81-0.96	0.002
KCTD20	1.46	1.09-1.96	0.012
KDSR	1.42	1.08-1.87	0.012
KIAA1598	1.31	1.14-1.5	0
KIF1B	1.43	1.15-1.77	0.001
KIF2A	1.19	0.97-1.46	0.088
KIFAP3	1.29	1.06-1.57	0.012
KLHL2	0.87	0.72-1.06	0.174
KLHL20	1.25	0.99-1.6	0.065
KLHL21	1.19	1-1.43	0.053
KLHL7	1.26	0.95-1.69	0.113
KPNA3	1.22	1.01-1.47	0.035
KPNA6	1.48	1.09-2.01	0.013
KSR1	1.17	1.01-1.34	0.035
LANCL1	1.17	0.94-1.45	0.17
LARP4	0.83	0.64-1.07	0.155
LARS	1.29	0.96-1.73	0.094
LDOC1L	1.15	0.99-1.34	0.07
LENG9	0.86	0.73-1.03	0.097
LEO1	1.28	0.95-1.73	0.1
LFNG	0.89	0.8-1	0.049
LGALSL	1.14	0.98-1.33	0.097
LHB	0.73	0.5-1.07	0.106
LIN7C	0.81	0.6-1.09	0.166
LINC00493	0.69	0.51-0.92	0.013
LMAN1	1.49	1.17-1.89	0.001
LMBR1	1.25	0.96-1.63	0.102
LPCAT2	1.11	0.98-1.25	0.112
LPGAT1	0.82	0.64-1.05	0.119
LPHN2	1.13	1.02-1.26	0.023
LPHN3	1.1	0.99-1.21	0.082
LRIG3	1.15	1.01-1.29	0.029
LRP12	1.22	1.06-1.39	0.004
LRPPRC	1.24	0.94-1.64	0.131
LRRC58	1.18	0.95-1.46	0.133
LSM11	1.21	0.96-1.52	0.108
LTA4H	1.25	0.95-1.66	0.115
LY6G5C	0.75	0.59-0.97	0.027
LZIC	1.33	1-1.76	0.052
MACF1	1.18	0.98-1.41	0.076
MAFG	1.44	1.17-1.76	0.001
MAGEE1	1.14	0.97-1.35	0.119
MAGI3	1.26	1.05-1.5	0.012
MALL	1.1	1-1.21	0.048
MAP2K1	1.52	1.13-2.05	0.006
MAP2K5	1.29	0.91-1.82	0.148
MAPK1	1.24	0.96-1.61	0.102
MAPK6	1.13	0.94-1.35	0.187
MAPKBP1	1.23	0.98-1.54	0.071
2023-03-05	0.81	0.6-1.08	0.153
MAT2B	0.74	0.58-0.95	0.018
MBOAT2	1.23	1.09-1.39	0.001
MBTPS2	1.18	0.93-1.49	0.167
MCFD2	1.31	1.05-1.63	0.017
MED12L	1.18	0.97-1.42	0.092
METTL15	0.73	0.54-1	0.053
METTL4	0.85	0.67-1.08	0.186
METTL8	1.28	1.01-1.63	0.044
MEX3D	0.85	0.69-1.05	0.138
MFAP1	1.36	0.96-1.92	0.082
MFAP3	1.18	0.99-1.4	0.058
MFSD11	1.56	1.17-2.07	0.002
MGAT5	1.16	0.96-1.42	0.132
MIB1	1.23	0.99-1.52	0.065
MICALL2	0.88	0.73-1.05	0.152
MIOX	0.82	0.64-1.05	0.112
MIPEP	1.32	1.02-1.7	0.036
MLH1	1.2	0.91-1.58	0.189
MLLT11	1.17	1.04-1.3	0.008
MMS19	1.69	1.21-2.36	0.002
MOB1A	0.8	0.6-1.08	0.141
MORF4L1	1.57	1.12-2.21	0.01
MPST	0.76	0.63-0.92	0.004
MRPL27	0.76	0.57-1	0.051
MRPL43	0.77	0.55-1.08	0.135
MRPL49	1.29	0.96-1.74	0.088
MRPL57	0.8	0.61-1.05	0.104
MRPS27	1.3	0.97-1.74	0.084
MSL2	0.71	0.52-0.97	0.031
MTMR2	1.57	1.16-2.12	0.003
MTOR	1.23	0.93-1.62	0.154
MTPN	1.33	1.02-1.72	0.032
MTSS1	1.1	0.96-1.26	0.167
MYO1D	1.21	1-1.46	0.055
N6AMT2	0.82	0.63-1.07	0.138
NAMPT	1.18	1.02-1.36	0.03
NBAS	1.78	1.36-2.32	0
NCBP2	0.73	0.52-1.01	0.061
NCDN	1.3	0.95-1.78	0.106
NDUFC1	0.68	0.51-0.9	0.007
NDUFS1	1.22	0.93-1.61	0.151
NDUFS5	0.86	0.7-1.07	0.173
NDUFV2	0.73	0.57-0.94	0.015
NFATC3	1.22	0.98-1.51	0.076
NFE2L1	1.21	0.94-1.57	0.143
NFE2L3	0.89	0.79-1.01	0.067
NFKB1	0.85	0.69-1.06	0.15
NIN	1.3	1.04-1.64	0.023
NIPA1	1.15	0.99-1.33	0.063
NIPA2	1.21	0.96-1.52	0.1
NKIRAS1	1.4	1.07-1.83	0.015
NMRK1	0.87	0.72-1.05	0.152
NOL9	1.31	0.98-1.76	0.073
NOLC1	1.22	0.94-1.58	0.13
NOMO1	1.42	1.11-1.82	0.006
NOMO2	1.22	1.03-1.45	0.022
NOP9	1.23	0.96-1.58	0.095
NOTCH2	1.22	1.04-1.43	0.016
NPHP4	1.36	1.05-1.75	0.018
NPIPB6	0.38	0.17-0.85	0.018
NPTN	1.3	1-1.67	0.047
NRBF2	1.34	1-1.79	0.048
NSD1	1.19	0.95-1.48	0.133
NUCKS1	1.39	1.05-1.83	0.023
NUP133	1.28	0.93-1.77	0.135
NUP160	1.17	0.92-1.48	0.198
NUP205	1.26	1.01-1.57	0.043
NUP98	1.23	0.92-1.66	0.168
NUPL1	1.23	0.97-1.58	0.094
OGDH	1.35	1.03-1.77	0.031
OLFM4	1.04	0.99-1.09	0.134
OPN3	1.19	1.03-1.38	0.022
OS9	1.23	0.95-1.6	0.119
OSBPL8	1.19	0.97-1.46	0.1
OXLD1	0.83	0.65-1.05	0.112
P2RY1	1.11	1-1.24	0.05
PAFAH1B2	1.44	1-2.06	0.048
PAK1	0.87	0.73-1.04	0.122
PAOX	0.78	0.62-0.99	0.045
PARD3	1.37	1.1-1.71	0.005
PARN	1.41	0.99-1.99	0.054
PCDHB11	1.16	1.03-1.31	0.016
PCDHB12	1.35	1.12-1.63	0.002
PCDHB13	1.21	1.04-1.41	0.014
PCDHB16	1.12	0.99-1.26	0.077
PCDHB8	1.22	1.07-1.39	0.002
PCDHGA1	1.36	1.12-1.65	0.002
PCDHGA2	1.39	1.14-1.7	0.001
PCDHGA3	1.45	1.11-1.88	0.006
PCDHGA4	1.33	1.08-1.64	0.006
PCDHGB1	1.23	1.05-1.44	0.011
PCDHGB2	1.2	1.03-1.41	0.018
PCDHGB5	1.14	1.02-1.27	0.021
PCDHGC3	1.25	1.11-1.42	0
PCDHGC5	1.32	1.04-1.67	0.022
PCLO	1.18	1.06-1.3	0.002
PCNX	1.2	0.97-1.48	0.094
PCYOX1	1.19	0.94-1.52	0.15
PDCD11	1.25	0.93-1.68	0.139
PDE7A	0.86	0.72-1.02	0.078
PDK3	0.86	0.71-1.03	0.104
PDLIM1	0.85	0.72-1	0.05
PDP1	0.89	0.74-1.06	0.186
PDS5B	1.21	0.97-1.52	0.089
PDZD8	1.21	0.97-1.5	0.089
PEX11G	0.82	0.67-1	0.053
PFKFB2	1.13	0.94-1.35	0.185
PFKM	1.2	0.98-1.47	0.078
PGAM1	1.29	1.07-1.56	0.008
PGD	1.17	1.01-1.36	0.035
PGM3	1.39	1.08-1.79	0.011
PHF1	0.71	0.55-0.93	0.012
PHF13	1.29	0.96-1.74	0.086
PHF20	1.24	0.92-1.68	0.163
PI4K2B	0.83	0.65-1.05	0.118
PIGK	1.24	0.99-1.55	0.058
PIGS	1.41	1.12-1.78	0.003
PIK3C3	1.38	1.07-1.78	0.012
PJA2	1.26	1.01-1.57	0.04
PKP2	0.91	0.81-1.03	0.134
PLD1	1.23	1.06-1.42	0.007
PLEKHF1	0.9	0.81-1	0.041
PMM2	1.17	0.97-1.41	0.104
PNKD	0.77	0.63-0.95	0.014
POLR3A	1.29	0.96-1.73	0.089
POLR3B	1.23	0.96-1.6	0.108
POMK	1.15	0.96-1.38	0.123
PPCDC	0.82	0.61-1.09	0.164
PPME1	1.42	1.09-1.84	0.008
PPP1CB	1.28	0.94-1.72	0.112
PPP1R11	0.7	0.5-0.99	0.042
PPP1R1C	1.23	1.04-1.45	0.018
PPP2R3A	1.32	1.14-1.54	0
PPRC1	1.29	0.93-1.79	0.134
PRDM4	0.74	0.52-1.03	0.074
PRKCI	1.16	0.92-1.46	0.198
PRMT6	1.27	1.05-1.53	0.013
PRR13	0.68	0.51-0.91	0.009
PRRG4	0.88	0.77-1	0.058
PSMG2	0.79	0.59-1.06	0.121
PSMG4	0.85	0.68-1.07	0.161
PTPLB	1.18	0.97-1.44	0.092
PTPN1	1.19	0.91-1.55	0.195
PTPN14	1.27	1.06-1.52	0.01
PTPN18	0.84	0.68-1.04	0.102
PTPN2	0.82	0.63-1.06	0.136
PTPN21	1.21	1-1.47	0.048
PVRL3	1.09	0.98-1.22	0.11
QKI	1.21	1-1.47	0.056
QSER1	1.18	0.97-1.43	0.098
QTRTD1	0.82	0.62-1.07	0.148
RAB22A	1.36	0.98-1.88	0.068
RAB28	0.65	0.48-0.88	0.005
RAB43	0.82	0.63-1.06	0.131
RAB6A	1.28	0.97-1.69	0.078
RAB9A	0.85	0.66-1.08	0.173
RAP2A	1.26	1-1.59	0.048
RAPGEF5	1.18	1.03-1.36	0.015
RARS	1.31	0.93-1.85	0.125
RASA1	1.29	1.08-1.55	0.005
RBBP5	1.24	0.91-1.7	0.172
RBMX	0.79	0.56-1.12	0.183
RDX	1.22	1.06-1.4	0.006
RECQL	1.21	1.02-1.45	0.032
REEP3	1.2	0.97-1.5	0.096
REV3L	1.25	1.06-1.48	0.009
RFX5	0.83	0.67-1.04	0.107
RILP	0.73	0.62-0.87	0.001
RIOK2	1.34	0.96-1.88	0.086
RMDN3	1.35	0.98-1.86	0.065
RNF11	1.22	0.94-1.6	0.141
RNF141	1.18	0.93-1.48	0.168
RNF216	1.29	0.99-1.69	0.064
RNF222	1.25	0.99-1.56	0.057
RNF40	1.39	1.08-1.81	0.012
RNGTT	1.28	0.99-1.67	0.063
RNPEPL1	0.81	0.64-1.04	0.099
ROCK1	1.14	0.93-1.41	0.198
RP11_196G11.1	4.12	1.16-14.59	0.028
RP11_449H3.3	4.09	0.69-24.25	0.12
RP11_514O12.4	0.63	0.41-0.99	0.043
RP2	0.79	0.64-0.98	0.029
RPE	1.26	0.96-1.65	0.096
RPTOR	1.42	1.02-1.96	0.035
RRP15	1.27	0.95-1.7	0.107
RS1	0.44	0.22-0.88	0.02
RSG1	1.22	0.91-1.65	0.185
RTCA	1.33	0.92-1.92	0.135
RTFDC1	1.37	0.97-1.94	0.072
RTN4	1.19	0.92-1.54	0.191
S100A6	0.93	0.84-1.02	0.135
SAMD8	1.32	1.04-1.67	0.021
SAT2	0.76	0.62-0.94	0.01
SCD	1.15	1.04-1.28	0.006
SCML1	0.87	0.75-1.01	0.061
SCRN2	0.7	0.57-0.86	0.001
SEC22C	1.32	1.04-1.68	0.022
SEC23A	1.42	1.15-1.74	0.001
SEC23B	1.18	0.93-1.5	0.171
SEC24A	1.23	0.97-1.57	0.083
SEC24C	1.15	0.98-1.34	0.092
SEC24D	1.22	1-1.47	0.045
SEC31A	1.38	1.01-1.9	0.043
SEC63	1.22	0.9-1.65	0.191
SELK	0.71	0.54-0.94	0.019
SEMA3B	0.93	0.85-1.01	0.092
2023-09-15	1.26	0.89-1.8	0.194
2023-09-07	1.46	1.06-2.01	0.022
SERINC1	1.35	1.05-1.74	0.02
SERTAD3	0.79	0.59-1.04	0.093
SETD7	1.25	1.02-1.54	0.036
SF3A1	1.23	0.91-1.64	0.174
SFXN1	1.34	1.02-1.77	0.039
SH2B2	0.84	0.7-1.02	0.074
SH3BP5L	0.8	0.59-1.09	0.155
SKI	1.27	0.96-1.68	0.093
SLC12A2	1.22	1.03-1.44	0.019
SLC25A15	1.39	1.11-1.74	0.005
SLC25A43	1.16	0.99-1.36	0.068
SLC2A12	1.22	1.08-1.37	0.002
SLC30A5	1.26	0.92-1.72	0.155
SLC35E1	1.25	0.91-1.71	0.162
SLC35G5	0.16	0.03-0.73	0.019
SLC36A4	1.15	0.99-1.33	0.06
SLC39A10	1.15	0.95-1.39	0.146
SLC5A1	1.08	0.96-1.21	0.199
SLC7A1	1.16	1.01-1.32	0.03
SLC7A11	1.11	1.03-1.19	0.009
SLMAP	1.16	0.95-1.41	0.147
SMAD1	1.19	0.99-1.44	0.062
SMARCA1	1.15	1-1.33	0.053
SMG7	1.31	0.94-1.82	0.105
SMIM1	0.85	0.67-1.06	0.153
SMIM4	0.8	0.65-0.98	0.032
SMYD2	1.22	0.96-1.55	0.104
SNN	0.86	0.73-1.02	0.08
SNRPF	0.77	0.62-0.96	0.022
SNTB2	1.24	0.95-1.62	0.109
SNX19	1.22	1-1.48	0.045
SNX2	1.22	0.94-1.58	0.132
SNX25	1.22	0.97-1.54	0.081
SNX29	1.37	1.12-1.68	0.002
SOCS6	1.19	0.98-1.45	0.074
SOGA1	1.32	1.08-1.6	0.006
SOSTDC1	1.21	1.09-1.35	0
SOX6	1.1	0.96-1.26	0.181
SPAG9	1.25	1.02-1.53	0.032
SPNS1	1.47	1.07-2.02	0.017
SPR	0.86	0.7-1.05	0.128
SPTBN2	1.14	1.01-1.3	0.039
SQLE	1.19	1.02-1.38	0.023
SRGAP1	1.18	1-1.4	0.05
SRGAP2C	1.35	1.09-1.68	0.006
SRP9	0.72	0.52-0.98	0.038
SRPK1	0.82	0.65-1.03	0.092
SRPR	1.42	1-2.01	0.052
SRXN1	1.33	1.13-1.57	0.001
SS18L2	0.69	0.53-0.89	0.004
SSBP2	1.11	0.96-1.29	0.172
SSFA2	1.35	1.17-1.55	0
SSR1	1.26	0.96-1.65	0.101
ST7	1.4	1-1.96	0.051
STAG1	1.16	0.97-1.4	0.109
STIM1	1.21	0.96-1.52	0.106
STK39	0.82	0.68-0.98	0.028
STK4	0.81	0.62-1.05	0.111
STRN	1.26	0.98-1.64	0.075
STT3A	1.51	1.11-2.05	0.008
STYXL1	0.78	0.61-1	0.048
SUMF2	1.5	1.21-1.85	0
SUPT6H	1.44	1-2.06	0.047
SUZ12	1.2	0.93-1.54	0.159
SYAP1	0.77	0.55-1.09	0.148
SYT1	1.08	0.97-1.19	0.15
SYT14	0.91	0.8-1.02	0.117
TAF10	0.79	0.6-1.04	0.088
TAF1B	1.19	0.95-1.47	0.124
TAF4B	1.26	1.09-1.46	0.002
TASP1	1.32	0.99-1.77	0.06
TBC1D14	1.12	0.95-1.31	0.175
TBC1D16	1.18	0.98-1.42	0.079
TCFL5	1.2	0.95-1.52	0.126
TCIRG1	0.74	0.63-0.87	0
TCTN3	1.29	0.91-1.83	0.148
TET1	1.23	1.05-1.45	0.013
TEX2	1.4	1.11-1.77	0.005
TFRC	1.15	1.02-1.31	0.028
THAP7	0.76	0.59-0.96	0.024
THRAP3	1.29	0.88-1.89	0.198
THYN1	0.82	0.65-1.03	0.081
TIMM21	1.22	0.95-1.59	0.125
TLK1	1.24	0.94-1.64	0.134
TM9SF1	1.33	1.01-1.75	0.041
TMA7	0.78	0.63-0.96	0.019
TMCO3	1.3	1.08-1.56	0.005
TMED3	1.17	0.93-1.49	0.186
TMEM127	0.76	0.55-1.05	0.097
TMEM164	0.8	0.66-0.97	0.026
TMEM17	1.56	1.22-1.99	0
TMEM185B	1.22	0.97-1.54	0.084
TMEM238	0.82	0.7-0.96	0.011
TMEM241	1.23	1.03-1.46	0.022
TMEM50A	0.73	0.48-1.09	0.126
TMEM89	0.14	0.02-0.9	0.039
TMEM91	0.89	0.77-1.03	0.13
TMOD3	1.28	1.02-1.6	0.034
TMPPE	1.19	0.94-1.51	0.139
TNPO1	1.35	1.05-1.73	0.018
TP53I13	0.74	0.61-0.9	0.002
TRAK2	1.18	0.95-1.46	0.141
TRAM1L1	1.13	0.97-1.3	0.11
TRDMT1	1.23	1.01-1.49	0.038
TRIM26	0.55	0.42-0.73	0
TRIM58	1.2	0.97-1.48	0.087
TRIOBP	0.8	0.64-1	0.051
TRIP10	0.88	0.73-1.07	0.194
TRIP12	1.22	0.93-1.59	0.15
TRMT2A	0.69	0.52-0.91	0.008
TROVE2	1.29	1.04-1.6	0.02
TSPO	0.81	0.7-0.95	0.007
TTC30A	1.15	0.96-1.38	0.137
TTLL7	1.19	1.06-1.33	0.003
TUBGCP3	1.17	0.93-1.48	0.189
TUSC2	0.8	0.63-1	0.053
TXLNG	0.8	0.62-1.03	0.082
TXNRD1	1.19	1.05-1.33	0.005
TYW3	1.42	1.11-1.82	0.006
UBA6	0.86	0.7-1.05	0.145
UBALD2	0.78	0.64-0.96	0.019
UBE2K	0.72	0.52-1	0.049
UBE2Q2	1.2	0.95-1.52	0.133
UBE3C	1.28	0.99-1.66	0.063
UBFD1	1.18	0.92-1.5	0.19
UBQLN2	0.83	0.65-1.05	0.113
UBXN7	1.18	0.93-1.49	0.186
UGGT1	1.3	1.01-1.65	0.038
UHRF1BP1L	1.15	0.93-1.41	0.187
ULBP3	1.18	0.93-1.5	0.179
UNC50	0.76	0.53-1.08	0.125
URB1	1.21	0.98-1.5	0.078
USMG5	0.8	0.61-1.04	0.101
USP25	1.27	1.03-1.57	0.023
USP32	1.23	1-1.53	0.051
UTP20	1.17	0.93-1.46	0.181
VAMP8	0.8	0.67-0.96	0.015
VANGL1	1.23	0.99-1.52	0.057
VAPA	1.24	0.95-1.6	0.108
VAPB	1.26	0.97-1.65	0.089
VASP	0.8	0.64-1.01	0.062
VPS9D1	0.73	0.58-0.92	0.007
VWA7	0.87	0.72-1.05	0.141
WASF2	1.17	0.97-1.4	0.104
WDFY1	0.84	0.67-1.07	0.161
WDFY2	1.17	0.94-1.47	0.165
WDR3	1.18	0.94-1.49	0.149
WDR43	1.21	0.92-1.61	0.176
WDR47	1.16	0.93-1.45	0.188
WDR7	1.17	0.93-1.48	0.184
WDR75	0.81	0.6-1.09	0.158
WNK1	1.23	0.98-1.53	0.069
WTAP	0.77	0.55-1.06	0.107
XKR8	0.8	0.59-1.09	0.165
XKR9	0.87	0.76-1	0.056
XPNPEP1	1.35	0.94-1.93	0.101
YIPF5	1.26	0.94-1.67	0.118
YME1L1	1.28	0.97-1.69	0.075
ZC3HAV1L	1.3	1.08-1.58	0.006
ZDHHC5	1.37	0.96-1.94	0.081
ZFP64	1.34	1.02-1.75	0.034
ZFP91	1.3	0.97-1.74	0.081
ZFYVE26	1.17	0.93-1.49	0.185
ZNF106	1.27	1.04-1.57	0.022
ZNF407	1.26	0.99-1.6	0.061
ZNF532	1.24	1.05-1.47	0.01
ZNF618	0.89	0.78-1.02	0.101
ZNRF3	1.34	0.92-1.95	0.129
ZRANB1	1.21	0.97-1.49	0.086
ZRSR2	0.54	0.4-0.72	0

## Sheet: BRCA
characteristics	Hazard.Ratio	CI95	P.Value
A1CF	1.46	0.84-2.52	0.18
AC006116.20	0.72	0.44-1.17	0.187
AC079907.1	0.01	0-0.33	0.011
AC087350.1	1.31	0.9-1.91	0.151
AC091180.1	0.22	0.02-2	0.178
AC104650.2	0.01	0-0.54	0.023
AC110602.1	3.16	0.67-14.79	0.145
AC242988.1	2.02	0.87-4.69	0.103
ADH6	0.52	0.26-1.05	0.068
AF165138.7	0.24	0.03-2	0.188
ALS2CR12	1.33	0.88-2.03	0.178
ARHGEF33	0.77	0.54-1.11	0.159
ATP5B	1.74	1.25-2.41	0.001
ATRIP	0.45	0.16-1.26	0.126
ATXN3	0.74	0.51-1.07	0.111
C10orf131	2.37	1.24-4.55	0.009
C19orf67	2.01	0.74-5.49	0.174
C1orf146	0.24	0.03-1.95	0.182
C2orf91	0.49	0.22-1.1	0.082
C9orf47	0.77	0.56-1.05	0.1
CALB1	1.39	0.98-1.97	0.065
CCDC146	0.8	0.65-0.98	0.032
CCDC54	2.7	0.62-11.7	0.185
CCDC7	1.27	0.98-1.64	0.066
CCNL1	0.81	0.63-1.05	0.118
CD160	0.71	0.47-1.07	0.098
CDRT4	0.71	0.49-1.03	0.071
CELA2B	0.14	0.02-0.84	0.032
CKMT2	0.83	0.64-1.07	0.156
CNTN2	0.86	0.69-1.08	0.195
COX20	0.84	0.65-1.08	0.172
CPO	1.51	0.91-2.48	0.108
CREBZF	1.18	0.92-1.52	0.18
CTRL	0.02	0-0.85	0.041
CYP3A43	0.07	0.01-0.68	0.022
CYP8B1	1.24	0.91-1.67	0.172
DAO	6.64	1.42-30.97	0.016
DCDC2B	0.52	0.24-1.12	0.095
DDX17	0.8	0.58-1.1	0.163
DKFZp434P228	0.23	0.03-1.85	0.168
DMTF1	0.81	0.62-1.06	0.133
ENOSF1	0.72	0.57-0.92	0.007
EYS	1.19	0.92-1.52	0.182
FLRT1	0.68	0.44-1.03	0.071
FNBP4	0.8	0.6-1.06	0.118
GLIPR1L1	0.44	0.22-0.88	0.021
GP6	0.63	0.39-0.99	0.047
HBG2	2.3	0.66-7.96	0.188
HEATR4	0.75	0.57-1	0.048
HFE2	1.29	0.89-1.88	0.179
HFM1	0.57	0.31-1.07	0.081
HIST1H2AG	1.11	0.98-1.27	0.104
HIST1H2BC	0.89	0.79-1.02	0.086
HIST1H3E	1.17	0.95-1.45	0.136
HIST2H2AC	0.8	0.58-1.11	0.187
IL4	0.08	0.01-1.09	0.058
KCNJ13	1.31	1.04-1.65	0.022
KCNMB2	1.62	1.16-2.27	0.005
KCNRG	0.63	0.33-1.2	0.158
KLHL10	0.24	0.05-1.1	0.066
L3HYPDH	0.8	0.59-1.07	0.137
LPA	2.86	0.71-11.61	0.141
LRRC69	1.28	0.96-1.69	0.088
LRRC9	1.43	0.88-2.33	0.144
LSMEM2	0.12	0.02-0.73	0.022
MAK	0.77	0.63-0.95	0.016
MROH7	0.47	0.24-0.9	0.023
MROH7_TTC4	0	0-0.12	0.002
MTRNR2L12	1.13	0.95-1.35	0.175
MTRNR2L3	1.62	0.95-2.77	0.076
MYSM1	0.85	0.7-1.04	0.109
N4BP2L1	0.76	0.63-0.93	0.007
NKTR	0.82	0.65-1.03	0.088
NME9	0.45	0.23-0.86	0.015
NPHP3_ACAD11	3.59	0.7-18.38	0.125
NPIPB3	0.81	0.6-1.08	0.151
NPIPB4	0.79	0.61-1.03	0.079
NPIPB5	0.84	0.7-1.01	0.071
PCDHA9	1.49	1.09-2.04	0.013
PCDHGA8	1.24	1.01-1.51	0.038
PCDHGC5	1.38	0.97-1.96	0.073
PDE6C	0.43	0.22-0.84	0.014
PGBD3	4.97	0.8-31.05	0.086
PHACTR3	1.26	0.97-1.64	0.083
PHF21A	0.65	0.44-0.94	0.023
PNN	0.73	0.52-1.01	0.058
PRB3	1.43	0.96-2.12	0.078
PRDM11	0.71	0.56-0.91	0.007
PRDM15	1.29	0.89-1.87	0.182
PRELID2	0.81	0.61-1.08	0.159
PROX2	0.61	0.33-1.14	0.12
PRPF38B	0.67	0.49-0.93	0.016
RBM25	0.75	0.54-1.06	0.101
RBM33	0.75	0.53-1.07	0.11
RGS17	1.35	1.02-1.8	0.037
RHD	0.66	0.45-0.99	0.043
RP11_314N13.10	1.43	0.89-2.28	0.14
RP11_411B6.6	0.25	0.05-1.31	0.1
RP11_444E17.6	0.31	0.09-1.02	0.054
RP11_574K11.31	0.36	0.13-1.05	0.061
RP11_691N7.6	0.66	0.36-1.2	0.173
RSPH10B2	0.12	0.01-2.04	0.141
SERPIND1	1.37	0.89-2.12	0.154
SHBG	0.35	0.13-0.98	0.045
SLC10A1	1.57	0.89-2.76	0.121
SLC22A1	1.53	0.89-2.64	0.127
SLC47A2	0.56	0.31-1.03	0.062
SPATA7	0.78	0.57-1.07	0.127
SPDYE6	0.68	0.39-1.21	0.191
SRSF11	0.75	0.55-1.03	0.079
STAB2	0.66	0.47-0.9	0.01
SYCP3	0.67	0.44-1	0.05
SYT2	0.72	0.45-1.16	0.182
TAC4	0.57	0.26-1.28	0.174
TAS2R4	0.72	0.46-1.12	0.14
TAS2R5	0.72	0.45-1.16	0.175
TECTA	1.41	1.09-1.84	0.01
THOC1	0.72	0.53-0.96	0.027
TMEFF2	0.18	0.03-1.28	0.087
TSPO2	0.18	0.02-1.46	0.108
TVP23C	0.8	0.59-1.07	0.133
USP50	0.04	0-0.64	0.023
VSIG8	1.96	1.31-2.93	0.001
ZBTB25	0.77	0.56-1.06	0.108
ZNF26	0.75	0.56-1	0.052
ZNF559	0.84	0.67-1.04	0.116
ZNF789	0.75	0.56-1.01	0.058
ZRSR1	2.73	0.9-8.27	0.075

## Sheet: CESC
characteristics	Hazard.Ratio	CI95	P.Value
BANP	1.74	1-3.02	0.049
BBS2	1.31	0.93-1.84	0.119
CDT1	0.74	0.53-1.04	0.082
CENPBD1	1.26	0.91-1.74	0.159
CHTF8	1.5	0.89-2.52	0.124
CMTR2	1.34	0.94-1.91	0.11
COX4I1	0.63	0.41-0.98	0.039
FAM96B	0.73	0.48-1.12	0.148
FHOD1	1.51	1.05-2.16	0.025
GALNS	1.32	0.95-1.84	0.093
GINS2	0.64	0.45-0.91	0.012
GLG1	1.63	1.04-2.56	0.032
ITFG1	1.67	1.06-2.62	0.027
KATNB1	0.75	0.49-1.15	0.186
KLHL36	1.44	0.98-2.1	0.063
LONP2	1.48	0.92-2.38	0.11
NIP7	1.36	0.88-2.1	0.165
NOB1	1.39	0.86-2.24	0.183
NOL3	1.45	1.02-2.07	0.039
OGFOD1	1.75	0.97-3.15	0.061
PDF	2.13	1.32-3.44	0.002
PRMT7	0.71	0.44-1.13	0.15
PRR14	0.59	0.35-0.97	0.037
SETD6	1.38	0.89-2.13	0.148
SLC38A7	1.44	0.91-2.26	0.116
SLC7A6OS	1.48	0.93-2.35	0.097
SLC9A5	1.36	0.96-1.92	0.085
TBC1D10B	0.45	0.23-0.85	0.015
TCF25	0.7	0.43-1.14	0.15
TRAPPC2L	0.58	0.38-0.9	0.014
USB1	1.48	0.98-2.23	0.064
VAC14	0.54	0.33-0.87	0.012
WWOX	0.6	0.42-0.87	0.006
ZNF319	1.42	0.97-2.07	0.069

## Sheet: COAD
characteristics	Hazard.Ratio	CI95	P.Value
AASDH	0.75	0.52-1.09	0.135
ABCA5	0.81	0.64-1.02	0.069
ABCD3	0.63	0.45-0.89	0.008
ACER3	0.71	0.48-1.06	0.093
AFF1	0.81	0.61-1.07	0.144
AFF4	0.84	0.64-1.09	0.191
AGAP6	1.44	1.04-1.98	0.028
AGFG1	0.64	0.4-1.04	0.07
AGGF1	0.71	0.47-1.06	0.09
AGL	0.81	0.61-1.06	0.124
AGPS	0.77	0.54-1.1	0.15
AHI1	0.76	0.56-1.04	0.087
AHSA2	1.27	0.99-1.62	0.058
ALG6	0.75	0.54-1.02	0.068
AMD1	0.76	0.54-1.07	0.114
ANAPC10	0.76	0.5-1.13	0.173
ANKRD17	0.69	0.47-1.01	0.056
ANKRD32	0.71	0.5-1.01	0.054
AP3B1	0.67	0.47-0.96	0.029
AP5M1	0.73	0.54-1	0.046
APAF1	0.72	0.51-1.01	0.055
APPBP2	0.71	0.48-1.05	0.089
ARAP2	0.84	0.66-1.08	0.176
ARFIP1	0.7	0.51-0.96	0.026
ARHGAP5	0.86	0.69-1.08	0.194
ARL15	0.72	0.54-0.97	0.032
ARRDC3	0.84	0.65-1.08	0.172
ASCC3	0.68	0.47-0.98	0.037
ATAD5	0.81	0.6-1.08	0.147
ATG4C	0.77	0.55-1.07	0.122
BBS7	0.68	0.42-1.11	0.127
BMP2K	0.71	0.5-1.03	0.068
BNIP2	1.26	0.94-1.7	0.123
BPTF	0.8	0.57-1.1	0.173
BRIP1	0.76	0.57-1.01	0.058
BTBD7	0.74	0.5-1.09	0.133
C18orf25	0.68	0.46-1	0.05
C3orf38	0.69	0.46-1.04	0.078
C4orf29	0.59	0.39-0.89	0.012
C4orf46	0.74	0.52-1.05	0.092
C5orf42	0.83	0.66-1.05	0.123
C6orf211	0.74	0.52-1.05	0.089
C9orf72	0.8	0.58-1.1	0.171
CAAP1	0.7	0.5-0.99	0.047
CAND1	0.72	0.47-1.1	0.132
CANX	0.68	0.47-0.98	0.038
CAPN7	0.73	0.51-1.04	0.083
CAPZA1	0.76	0.51-1.14	0.192
CAST	0.8	0.58-1.09	0.161
CBR4	0.74	0.55-1	0.05
CBX5	0.72	0.54-0.96	0.023
CCNC	0.74	0.53-1.04	0.085
CCNYL1	0.76	0.52-1.13	0.175
CDC14A	0.79	0.57-1.08	0.145
CDC27	0.81	0.61-1.06	0.126
CDC42	0.71	0.48-1.05	0.088
CDC42SE2	0.58	0.39-0.85	0.005
CENPC	0.78	0.56-1.08	0.137
CENPK	0.82	0.63-1.08	0.153
CEP192	0.77	0.57-1.04	0.09
CERS6	0.82	0.63-1.06	0.129
CHD1	0.85	0.66-1.09	0.196
CHMP2B	0.78	0.55-1.1	0.157
CLCC1	0.65	0.41-1.02	0.061
CLK1	1.33	0.95-1.85	0.096
CLOCK	0.75	0.57-0.99	0.046
CLTC	0.5	0.31-0.8	0.004
CMPK1	0.76	0.58-1	0.052
CNIH1	0.77	0.52-1.12	0.168
CNOT1	0.74	0.49-1.11	0.142
CNOT6	0.72	0.47-1.08	0.114
CNOT6L	0.76	0.55-1.04	0.083
CPD	0.74	0.56-0.98	0.035
CPEB4	0.85	0.66-1.08	0.189
CSNK1G3	0.75	0.53-1.08	0.125
CTTNBP2NL	0.72	0.5-1.04	0.082
CYB5R4	0.78	0.58-1.06	0.108
CYP20A1	0.66	0.38-1.14	0.138
DBT	0.81	0.58-1.12	0.195
DCAF10	0.69	0.45-1.06	0.091
DCK	0.8	0.58-1.09	0.159
DCP1A	0.69	0.44-1.09	0.111
DCTN4	0.64	0.4-1.02	0.058
DDX20	0.74	0.47-1.16	0.193
DDX39B	1.25	0.95-1.66	0.116
DDX46	0.78	0.53-1.14	0.197
DENND6A	0.75	0.52-1.1	0.143
DEPDC1	0.84	0.67-1.05	0.126
DHX15	0.49	0.3-0.8	0.005
DIAPH2	0.74	0.54-1.02	0.065
DIP2B	0.67	0.46-0.96	0.03
DNAJC10	0.8	0.6-1.06	0.12
DNAJC16	0.72	0.47-1.1	0.126
DOCK7	0.74	0.52-1.05	0.094
DR1	0.76	0.52-1.11	0.161
DTD2	0.72	0.53-0.98	0.038
DTWD2	0.71	0.52-0.98	0.037
EDEM1	0.75	0.51-1.1	0.141
EDEM3	0.84	0.66-1.08	0.167
EIF2AK3	0.76	0.53-1.09	0.14
ELMOD2	0.79	0.59-1.06	0.114
ENPP4	0.78	0.57-1.07	0.12
ENTPD4	0.74	0.55-0.99	0.045
EPB41L5	0.78	0.54-1.13	0.193
EPS15	0.75	0.53-1.07	0.113
EPT1	0.75	0.52-1.06	0.102
ETF1	0.58	0.35-0.96	0.036
ETNK1	0.8	0.62-1.05	0.107
EVI5	0.75	0.55-1.02	0.07
EXOG	0.72	0.48-1.08	0.109
FAM102B	0.81	0.59-1.1	0.174
FAM122A	0.73	0.46-1.17	0.187
FAM135A	0.76	0.59-0.97	0.028
FANCB	0.75	0.52-1.07	0.108
FARP2	0.59	0.35-0.97	0.039
FASTKD1	0.79	0.57-1.1	0.158
FASTKD2	0.66	0.43-0.99	0.044
FBXL17	0.72	0.52-0.99	0.04
FBXO33	0.68	0.42-1.11	0.123
FBXO38	0.68	0.41-1.14	0.148
FBXW11	0.72	0.44-1.17	0.187
FBXW7	0.77	0.52-1.14	0.188
FEM1C	0.81	0.59-1.11	0.183
FMNL2	0.81	0.61-1.09	0.168
FNBP1L	0.76	0.56-1.03	0.074
FNBP4	1.32	0.9-1.94	0.152
FPGT	0.79	0.58-1.06	0.12
FRYL	0.77	0.6-1.01	0.056
FUBP1	0.57	0.37-0.88	0.012
G2E3	0.83	0.64-1.07	0.155
G3BP1	0.68	0.45-1.01	0.055
G3BP2	0.64	0.44-0.93	0.019
GAB1	0.73	0.53-1.01	0.059
GALNT1	0.79	0.59-1.05	0.11
GALNT7	0.75	0.58-0.97	0.027
GAS2L3	0.83	0.65-1.07	0.157
GCLM	0.77	0.54-1.08	0.129
GIN1	0.68	0.44-1.05	0.084
GLMN	0.76	0.57-1.02	0.067
GNAI3	0.73	0.46-1.15	0.17
GNG12	0.77	0.57-1.05	0.098
GNPNAT1	0.71	0.52-0.97	0.032
GOSR1	0.66	0.41-1.09	0.104
GPBP1L1	0.62	0.36-1.07	0.084
GPRIN3	0.8	0.66-0.97	0.021
GRPEL2	0.64	0.45-0.91	0.013
GSTCD	0.63	0.44-0.91	0.013
GUF1	0.76	0.53-1.09	0.134
HACE1	0.79	0.56-1.13	0.196
HAUS2	1.36	0.89-2.09	0.153
HEATR5A	0.74	0.54-1.02	0.065
HELQ	0.63	0.37-1.08	0.092
HELZ	0.79	0.58-1.07	0.13
HIGD1A	0.74	0.56-0.98	0.038
HMGXB4	0.64	0.4-1.02	0.058
HNRNPH1	0.68	0.41-1.14	0.142
HNRNPR	0.72	0.47-1.1	0.131
HOOK1	0.78	0.62-0.98	0.034
HS2ST1	0.72	0.54-0.97	0.031
IBTK	0.82	0.61-1.09	0.175
IDE	0.71	0.49-1.02	0.067
IER3IP1	0.75	0.53-1.08	0.125
INADL	0.72	0.5-1.05	0.086
INTS2	0.78	0.56-1.09	0.148
IPO11	0.74	0.51-1.07	0.11
ITGA2	0.81	0.62-1.05	0.109
KCTD20	0.74	0.48-1.13	0.166
KCTD9	0.76	0.59-0.98	0.033
KDM3A	1.45	0.96-2.19	0.074
KDM6A	0.75	0.53-1.04	0.082
KIAA0232	0.74	0.53-1.04	0.083
KIAA0391	0.56	0.34-0.93	0.026
KIAA0586	0.67	0.45-0.99	0.046
KIAA1107	0.77	0.55-1.07	0.12
KIAA1468	0.65	0.45-0.94	0.023
KIAA1598	0.78	0.57-1.08	0.134
KIAA1958	0.71	0.5-1.02	0.062
KIF21A	0.8	0.58-1.09	0.15
KIF2A	0.76	0.55-1.03	0.08
KLF3	0.68	0.47-0.99	0.046
KLHL8	0.72	0.52-1	0.052
LCORL	0.78	0.59-1.03	0.075
LEMD3	0.71	0.5-1.01	0.058
LMAN1	0.81	0.63-1.04	0.098
LMBR1	0.76	0.51-1.14	0.178
LMBRD2	0.83	0.63-1.09	0.191
LRBA	0.62	0.43-0.9	0.011
LRRC40	0.73	0.53-1	0.049
LRRC8B	0.79	0.59-1.05	0.098
LUZP1	0.76	0.54-1.06	0.109
LYSMD3	0.83	0.64-1.07	0.146
MAGI3	0.77	0.56-1.06	0.11
MALT1	0.78	0.57-1.05	0.105
MAN2A1	0.73	0.57-0.94	0.016
MANEA	0.8	0.62-1.04	0.098
MAP3K13	1.4	0.88-2.24	0.159
MAPK1	0.67	0.42-1.09	0.108
MAPK8	0.66	0.42-1.04	0.076
MBLAC2	0.74	0.5-1.09	0.132
MBTD1	0.82	0.62-1.08	0.157
MDM2	0.79	0.6-1.04	0.095
MED13	0.8	0.61-1.06	0.118
MFAP3	0.82	0.61-1.09	0.166
MGEA5	1.3	0.87-1.94	0.194
MICAL3	0.79	0.6-1.05	0.101
MIER1	0.8	0.61-1.04	0.1
MIS18BP1	0.85	0.66-1.08	0.184
MLLT4	0.71	0.5-1	0.048
MOB4	0.71	0.48-1.07	0.099
MPHOSPH9	0.81	0.6-1.08	0.148
MRPL42	0.77	0.53-1.11	0.165
MSI2	0.72	0.51-1.03	0.069
MTF2	0.78	0.55-1.09	0.149
MTMR9	0.75	0.54-1.03	0.071
MYO6	0.76	0.53-1.09	0.14
N4BP2	0.82	0.65-1.03	0.088
NAA15	0.79	0.58-1.07	0.129
NAA30	0.77	0.54-1.1	0.145
NAMPT	0.82	0.65-1.04	0.109
NBEAL1	0.74	0.56-0.99	0.04
NDC1	0.66	0.48-0.89	0.007
NEK4	0.66	0.45-0.98	0.039
NEK9	1.56	0.99-2.46	0.055
NFXL1	0.66	0.42-1.03	0.068
NPEPPS	0.72	0.49-1.05	0.089
NSUN6	1.54	0.98-2.41	0.06
NUP54	0.74	0.52-1.05	0.088
ODF2L	0.8	0.6-1.06	0.123
OMA1	0.76	0.56-1.04	0.09
OSBPL3	1.23	0.9-1.69	0.199
OSBPL9	0.69	0.44-1.07	0.094
OXSR1	0.68	0.41-1.13	0.135
PAFAH1B2	0.66	0.4-1.07	0.093
PAICS	0.77	0.55-1.08	0.126
PANK3	0.78	0.61-0.99	0.045
PAQR3	0.78	0.56-1.08	0.133
PARG	0.73	0.45-1.17	0.186
PAWR	0.69	0.49-0.97	0.031
PBRM1	0.71	0.5-0.99	0.043
PCM1	0.81	0.63-1.04	0.106
PDCD6IP	0.62	0.4-0.97	0.034
PDE12	0.56	0.35-0.9	0.015
PDE3B	0.85	0.67-1.09	0.198
PDS5A	0.78	0.56-1.08	0.139
PEX13	0.69	0.47-1.03	0.07
PGGT1B	0.82	0.61-1.1	0.193
PHACTR2	0.82	0.62-1.09	0.17
PHKB	0.64	0.4-1.01	0.054
PI4K2B	0.67	0.5-0.89	0.005
PIAS2	0.79	0.57-1.09	0.15
PIK3C3	0.76	0.53-1.08	0.123
PIK3R4	1.44	0.84-2.45	0.181
PJA2	0.8	0.6-1.06	0.123
PPAT	0.79	0.58-1.08	0.139
PPIP5K2	0.8	0.62-1.05	0.109
PPM1A	0.69	0.45-1.05	0.084
PPP2R1B	0.74	0.49-1.11	0.15
PPP6R3	0.58	0.34-0.98	0.043
PRKAR1A	0.73	0.5-1.07	0.11
PRR14L	0.77	0.53-1.12	0.171
PTPRG	0.79	0.57-1.09	0.15
PUM1	0.55	0.31-0.98	0.041
PUS7L	0.78	0.59-1.04	0.087
RAB28	0.64	0.41-1.01	0.057
RALGAPA1	0.81	0.62-1.05	0.116
RALGPS2	0.82	0.61-1.1	0.177
RBM27	0.83	0.64-1.09	0.191
RBM6	1.41	1-1.99	0.052
RBM7	0.73	0.51-1.05	0.086
RC3H1	0.81	0.6-1.1	0.174
RFC1	0.76	0.53-1.1	0.141
RHOG	1.65	1.1-2.47	0.016
RIOK2	0.75	0.51-1.1	0.139
RNF138	0.78	0.58-1.06	0.117
ROCK2	0.77	0.6-1	0.052
RPAP2	0.78	0.58-1.07	0.122
RPGRIP1L	0.72	0.49-1.07	0.103
RPRD1A	0.64	0.44-0.93	0.02
RPS6KA5	0.82	0.63-1.05	0.121
RPS6KB1	0.79	0.57-1.08	0.141
RSBN1	0.79	0.56-1.1	0.163
RTTN	0.75	0.51-1.11	0.153
SACM1L	0.73	0.48-1.1	0.127
SACS	1.16	0.95-1.43	0.153
SBNO1	0.74	0.48-1.15	0.18
SCARB2	0.78	0.54-1.13	0.193
SCOC	0.8	0.61-1.05	0.111
SCP2	0.71	0.51-1	0.053
SCYL3	0.68	0.42-1.11	0.121
SEC23A	0.8	0.58-1.1	0.171
SEC24B	0.68	0.43-1.05	0.084
SEPSECS	0.79	0.57-1.1	0.159
2023-09-11	0.78	0.55-1.09	0.145
2023-09-02	0.68	0.39-1.2	0.188
SERBP1	0.74	0.49-1.14	0.177
SH3D19	0.73	0.54-0.98	0.039
SH3GLB1	0.71	0.47-1.09	0.117
SHPRH	0.81	0.61-1.06	0.129
SIAH1	0.76	0.51-1.14	0.19
SLAIN2	0.72	0.46-1.11	0.138
SLC10A7	0.73	0.52-1.01	0.06
SLC25A24	0.8	0.61-1.05	0.114
SLC25A40	0.8	0.59-1.09	0.153
SLC25A46	0.72	0.51-1	0.052
SLC2A13	0.81	0.61-1.07	0.133
SLC30A5	0.73	0.47-1.15	0.178
SLC30A7	0.82	0.61-1.1	0.175
SLC30A9	0.69	0.5-0.95	0.023
SLC35A3	0.83	0.65-1.07	0.158
SLC4A1AP	1.48	0.87-2.51	0.15
SLC4A7	0.84	0.68-1.04	0.104
SMAD2	0.68	0.53-0.89	0.004
SMURF2	0.78	0.54-1.12	0.181
SOCS4	0.82	0.61-1.11	0.199
SPCS3	0.65	0.44-0.96	0.031
SRBD1	0.74	0.51-1.07	0.105
SREK1IP1	0.77	0.54-1.1	0.147
SRPK1	0.81	0.6-1.09	0.159
SRSF1	0.61	0.4-0.92	0.018
SSR1	0.78	0.54-1.14	0.196
SSX2IP	0.71	0.53-0.95	0.022
ST7L	0.68	0.42-1.08	0.104
STAM2	0.77	0.53-1.13	0.179
STARD4	0.83	0.66-1.05	0.122
STT3B	0.74	0.54-1	0.051
STXBP4	0.65	0.47-0.89	0.008
STXBP5	0.77	0.58-1.03	0.075
SYDE2	0.78	0.57-1.05	0.102
TAF1B	0.77	0.54-1.08	0.129
TBC1D12	0.73	0.51-1.05	0.091
TBCK	0.78	0.55-1.12	0.174
TCAIM	0.68	0.46-1.02	0.062
TDG	0.7	0.45-1.08	0.109
TET2	0.81	0.62-1.07	0.146
THAP9	0.74	0.48-1.14	0.167
TLK2	0.78	0.53-1.14	0.199
TMED5	0.77	0.6-0.98	0.031
TMED7	0.84	0.66-1.06	0.146
TMEM184C	0.74	0.49-1.11	0.141
TMEM33	0.71	0.5-1.01	0.058
TMEM87B	0.76	0.51-1.13	0.168
TMTC3	0.84	0.65-1.08	0.18
TMX1	0.78	0.58-1.04	0.093
TMX3	0.81	0.6-1.08	0.149
TNKS	0.76	0.57-1.01	0.061
TNPO1	0.78	0.58-1.06	0.115
TNRC6B	0.82	0.61-1.1	0.178
TRAK2	0.76	0.52-1.11	0.154
TRAPPC11	0.77	0.53-1.12	0.176
TRAPPC8	0.81	0.59-1.12	0.199
TRDMT1	0.69	0.46-1.05	0.084
TRIM2	0.79	0.62-1.02	0.071
TRIM37	0.77	0.52-1.12	0.17
TRNT1	0.71	0.5-1.01	0.059
TROVE2	0.81	0.61-1.1	0.175
TRUB1	0.82	0.61-1.1	0.193
TSC1	1.5	0.95-2.38	0.082
TXNDC16	0.78	0.58-1.03	0.08
UBA3	0.64	0.41-1	0.048
UBE2D3	0.66	0.4-1.11	0.117
UBE2J1	0.7	0.45-1.08	0.106
UBE2K	0.53	0.33-0.86	0.009
UBTD2	0.64	0.42-0.96	0.029
UBXN2A	0.72	0.44-1.16	0.174
USO1	0.69	0.48-0.98	0.037
USP24	0.67	0.45-0.99	0.043
USP33	0.77	0.55-1.08	0.128
USP38	0.67	0.46-0.98	0.039
USP45	0.73	0.52-1.04	0.084
USP53	0.7	0.53-0.91	0.008
USP9X	0.72	0.52-0.99	0.043
UTP20	0.79	0.56-1.11	0.169
VEZF1	0.61	0.38-0.98	0.041
VPS13D	0.81	0.59-1.11	0.188
VPS4B	0.72	0.51-1.03	0.071
WDFY3	0.8	0.58-1.1	0.174
WDR7	0.74	0.52-1.05	0.096
WRN	0.75	0.57-1	0.049
XPR1	0.79	0.56-1.11	0.175
YTHDC2	0.72	0.53-0.97	0.033
YY1AP1	1.62	0.91-2.87	0.102
ZCCHC10	0.75	0.49-1.16	0.198
ZCCHC11	0.74	0.53-1.04	0.086
ZDHHC21	0.8	0.6-1.07	0.13
ZFX	0.75	0.53-1.06	0.107
ZFYVE16	0.78	0.61-1.01	0.061
ZFYVE9	0.64	0.43-0.96	0.03
ZMPSTE24	0.71	0.5-1	0.051
ZMYM4	0.79	0.57-1.1	0.167
ZNF100	0.8	0.59-1.09	0.163
ZNF124	0.81	0.6-1.1	0.184
ZNF180	0.76	0.52-1.12	0.17
ZNF235	0.68	0.46-1.02	0.06
ZNF24	0.78	0.57-1.07	0.122
ZNF260	0.82	0.63-1.06	0.134
ZNF33B	1.27	0.89-1.8	0.185
ZNF562	0.78	0.54-1.14	0.198
ZNF587	0.79	0.57-1.09	0.146
ZNF644	0.77	0.58-1.02	0.064
ZNF714	0.83	0.65-1.07	0.145
ZNF91	0.83	0.64-1.08	0.169
ZYG11B	0.68	0.5-0.94	0.018
ZZZ3	0.75	0.5-1.11	0.15

## Sheet: ESCA
characteristics	Hazard.Ratio	CI95	P.Value
ABRACL	1.9	1.32-2.74	0.001
APOO	1.71	1.18-2.48	0.005
ARPC3	1.66	0.93-2.95	0.084
ATP5E	1.44	0.85-2.44	0.176
ATP5G2	1.46	0.91-2.34	0.117
BAG5	0.58	0.31-1.08	0.088
BOLA3	1.35	0.91-1.99	0.134
BTBD7	0.65	0.4-1.04	0.075
CDC42BPB	0.6	0.37-0.96	0.033
CHCHD1	1.61	0.98-2.66	0.063
CIPC	0.62	0.36-1.07	0.085
COX4I1	1.97	1.22-3.18	0.005
COX6A1	1.45	0.93-2.25	0.099
COX7A2	1.54	0.97-2.43	0.065
COX7B	2.37	1.52-3.69	0
COX7C	1.57	0.97-2.57	0.069
DICER1	0.72	0.47-1.09	0.117
DPY30	1.58	0.98-2.54	0.062
DYNLRB1	1.45	0.85-2.46	0.173
EIF3M	1.93	1.17-3.18	0.01
EXOSC1	1.77	0.99-3.18	0.055
FABP6	1.19	0.95-1.49	0.121
FAM96B	1.72	1.11-2.65	0.014
FUNDC2	1.51	0.86-2.66	0.155
GOLGA5	0.55	0.31-0.98	0.041
HIGD2A	1.41	0.95-2.11	0.091
HIST2H2AC	1.83	0.92-3.64	0.086
HSD17B10	1.72	1.04-2.84	0.035
IDH3G	2.88	1.66-4.99	0
IGBP1	2.23	1.4-3.57	0.001
KRTCAP2	1.42	0.89-2.28	0.144
LAMTOR5	1.56	0.9-2.71	0.111
LSM3	1.64	1.01-2.64	0.044
LUZP1	0.71	0.45-1.12	0.145
MESP2	1.21	0.93-1.57	0.16
MORN2	1.41	0.93-2.14	0.104
MRPL18	1.76	1.09-2.83	0.02
MRPL23	1.57	1.03-2.39	0.035
MTCH2	1.69	0.91-3.12	0.097
MTMR3	0.69	0.41-1.15	0.157
MYEOV2	1.52	0.89-2.62	0.126
NAA10	2.56	1.44-4.57	0.001
NACA	1.77	1.01-3.11	0.046
NACA2	1.91	1.07-3.43	0.03
NDUFA1	1.87	1.22-2.87	0.004
NDUFA12	1.76	1.06-2.92	0.028
NDUFA2	1.6	0.96-2.66	0.072
NDUFAF4	1.56	1.07-2.28	0.022
NDUFB11	1.64	1.07-2.5	0.023
NDUFB8	1.75	1.02-2.99	0.04
NDUFS3	1.66	0.97-2.81	0.062
NOL7	1.48	0.89-2.45	0.127
PDZD11	2.2	1.39-3.49	0.001
PET100	1.34	0.87-2.08	0.181
PQBP1	1.46	0.89-2.41	0.134
PSMA2	1.53	1.03-2.29	0.037
PSMB1	1.93	1.13-3.3	0.016
PTPN21	0.71	0.49-1.03	0.068
RBMX2	1.83	1.12-3	0.015
RP11_762I7.5	11.8	1.65-84.48	0.014
RPL10	1.58	0.98-2.56	0.061
RPL14	1.44	0.94-2.19	0.094
RPL24	1.37	0.88-2.14	0.165
RPL31	1.35	0.91-2	0.133
RPL36A	1.29	0.89-1.88	0.18
RPL39	1.54	1.01-2.35	0.044
RPS13	1.35	0.85-2.12	0.199
RPS19BP1	0.69	0.4-1.2	0.187
RRP7A	0.61	0.37-1.02	0.061
RSL24D1	1.53	0.91-2.59	0.111
SLC25A3	1.8	0.95-3.42	0.071
SLIRP	1.33	0.89-1.98	0.169
SNRPE	1.49	0.96-2.32	0.078
SNRPF	1.41	0.98-2.03	0.065
SNRPG	1.5	0.96-2.35	0.075
SYNE2	0.68	0.48-0.95	0.025
THOC7	1.65	1.01-2.71	0.048
TIMM17B	1.38	0.92-2.09	0.123
TMA7	1.44	0.92-2.28	0.113
TMEM208	1.45	0.92-2.3	0.112
TPRKB	1.81	1.12-2.91	0.015
TPT1	1.39	0.95-2.02	0.091
TRAPPC2L	1.61	1.01-2.55	0.044
TRIP11	0.72	0.46-1.13	0.159
TXN2	0.54	0.3-0.96	0.036
TXNL4A	1.42	0.9-2.25	0.132
UQCRQ	1.55	0.95-2.55	0.081
USMG5	1.71	1.08-2.72	0.022
USP32	0.67	0.39-1.16	0.153
UXT	1.6	1.04-2.46	0.033
VPS29	2.27	1.22-4.21	0.009
YLPM1	0.6	0.34-1.06	0.076

## Sheet: GBM
characteristics	Hazard.Ratio	CI95	P.Value
AACS	1.93	1.23-3.02	0.004
AAMP	1.71	0.82-3.56	0.15
ABR	1.26	0.95-1.67	0.115
ACAA2	1.24	0.96-1.6	0.101
ACADM	0.69	0.43-1.1	0.117
ACTR3C	1.51	1.12-2.03	0.007
ACYP2	0.82	0.63-1.08	0.161
ADAM19	1.09	0.96-1.24	0.168
ADAMTS15	0.86	0.74-0.99	0.034
ADARB1	1.23	0.95-1.6	0.123
ADCY1	1.13	0.98-1.32	0.097
ADCY3	1.35	0.96-1.9	0.086
ADI1	1.3	0.94-1.78	0.107
ADK	0.64	0.43-0.96	0.029
AGAP3	1.34	0.94-1.91	0.105
AGPAT6	1.33	0.92-1.91	0.132
AGTR1	1.3	1.06-1.6	0.012
AHR	1.12	0.95-1.31	0.176
AK2	0.7	0.47-1.04	0.078
ALKBH3	1.38	0.89-2.14	0.156
ALKBH5	1.76	1.09-2.85	0.022
ANKLE2	1.5	0.92-2.46	0.105
ANKRD24	1.19	0.97-1.47	0.095
ANKRD52	1.18	0.92-1.51	0.199
ANXA4	1.24	0.95-1.61	0.107
AP1S2	1.23	0.92-1.65	0.167
AP2A2	1.52	0.98-2.35	0.061
AP3S1	1.82	1.09-3.06	0.022
AP5Z1	1.47	1.05-2.05	0.024
AQP5	1.14	0.99-1.3	0.067
ARAP3	1.16	0.98-1.38	0.089
ARFRP1	1.58	1.05-2.37	0.027
ARHGAP12	0.5	0.34-0.73	0
ARHGAP23	1.18	0.92-1.51	0.186
ARHGAP31	0.81	0.62-1.07	0.147
ARHGEF10	1.25	0.94-1.66	0.119
ARID3A	1.29	0.98-1.7	0.068
ARID3C	1.64	0.81-3.34	0.169
ARL9	1.21	0.99-1.48	0.062
ARMC10	2.06	1.32-3.2	0.001
ARPIN	1.27	0.89-1.81	0.181
ARSB	1.68	1.02-2.78	0.044
ATG4C	0.73	0.46-1.15	0.177
ATP13A2	1.51	1.02-2.23	0.039
ATP5G3	0.71	0.54-0.95	0.022
ATP6AP1	1.86	1.04-3.31	0.036
ATP6V0A1	1.4	0.97-2.02	0.071
ATXN7L3	1.69	1.01-2.85	0.048
AUTS2	1.22	0.97-1.53	0.089
B9D1	1.24	0.93-1.67	0.146
BBS5	1.4	1-1.97	0.053
BCAP29	1.37	0.99-1.91	0.06
BHLHA15	1.93	0.85-4.39	0.114
BIN3	2.01	1.06-3.78	0.031
BLOC1S6	0.67	0.42-1.07	0.095
BOC	1.21	0.96-1.53	0.104
BRD9	1.32	0.88-1.99	0.183
C11orf24	1.42	0.87-2.3	0.157
C12orf66	1.23	0.95-1.61	0.119
C16orf74	1.2	0.96-1.49	0.11
C17orf59	1.4	0.84-2.35	0.198
C17orf62	1.61	0.92-2.81	0.097
C17orf64	2.58	0.76-8.82	0.13
C18orf8	1.77	0.99-3.13	0.052
C1orf226	0.79	0.64-0.98	0.035
C21orf2	1.58	1.08-2.3	0.018
C7orf26	1.61	1.03-2.51	0.037
C8orf58	1.64	1.02-2.65	0.04
CACNA1H	1.15	0.96-1.37	0.136
CACNB3	1.34	1.01-1.79	0.045
CAMTA2	1.32	0.88-1.96	0.176
CARS	1.33	0.88-2	0.176
CAV2	1.14	0.97-1.34	0.108
CC2D1B	1.44	0.93-2.25	0.105
CCBL2	0.78	0.54-1.13	0.193
CCDC120	0.84	0.71-1	0.051
CCDC137	1.44	0.91-2.29	0.12
CCDC152	1.23	1.04-1.47	0.019
CCDC53	1.3	0.89-1.9	0.175
CCDC8	1.25	1.08-1.44	0.003
CCM2	1.99	1.32-2.99	0.001
CD58	1.19	0.95-1.49	0.124
CD59	1.21	0.91-1.61	0.198
CD79B	1.47	1.11-1.95	0.008
CDH4	1.16	1.02-1.32	0.028
CECR2	0.83	0.69-1.01	0.064
CEP170B	1.26	1.01-1.57	0.041
CEPT1	0.6	0.34-1.07	0.086
CES2	1.45	0.95-2.21	0.082
CHPF	1.43	1.12-1.83	0.004
CISD1	0.77	0.54-1.09	0.146
CKAP4	1.46	1.07-1.99	0.018
CLCN7	1.31	0.93-1.85	0.126
CLDN9	1.34	0.89-2.02	0.154
CLIP2	1.17	0.94-1.44	0.153
CLN6	1.45	1.02-2.06	0.04
CLPTM1L	2.1	1.29-3.43	0.003
CMIP	1.33	0.97-1.83	0.077
CNBP	0.52	0.28-0.96	0.037
CNR2	7.13	0.54-94.58	0.137
CNTROB	1.26	0.92-1.71	0.145
COPRS	1.31	0.93-1.85	0.118
COQ10B	1.34	0.87-2.08	0.182
COX17	1.39	0.96-2.01	0.085
COX19	1.52	1.02-2.24	0.038
CRBN	0.72	0.5-1.03	0.072
CREM	0.78	0.57-1.07	0.126
CRIPT	0.77	0.56-1.05	0.093
CRYZ	1.22	0.91-1.63	0.187
CS	0.72	0.44-1.18	0.191
CTC_429P9.4	0.29	0.05-1.59	0.155
CTDP1	1.46	0.99-2.18	0.059
CTNS	1.47	0.89-2.43	0.129
CUL7	1.36	1.08-1.71	0.008
CUTC	0.67	0.45-1.02	0.062
CUX1	1.62	1.07-2.46	0.024
CYB5R1	1.19	0.94-1.51	0.142
CYHR1	1.36	0.9-2.05	0.139
CYSTM1	1.22	0.95-1.57	0.127
CYTH3	1.51	0.98-2.31	0.061
DACT1	1.19	0.97-1.46	0.102
DCUN1D1	0.56	0.32-0.98	0.041
DDX54	1.31	0.91-1.88	0.147
DENND1A	1.26	0.92-1.74	0.151
DENND2A	1.3	1.06-1.58	0.01
DERL2	1.55	0.89-2.68	0.12
DGKZ	1.23	0.93-1.63	0.139
DNAJB2	1.41	0.93-2.14	0.101
DNAJC7	1.36	0.89-2.08	0.154
DPF2	0.59	0.34-1.01	0.056
DRAM2	0.76	0.5-1.15	0.191
DTX2	1.71	1.12-2.61	0.012
DUSP23	1.21	0.99-1.49	0.064
ECI2	0.72	0.48-1.07	0.102
EEF2	0.76	0.57-1.01	0.056
EIF3J	0.67	0.42-1.06	0.089
EIF4A2	0.62	0.42-0.91	0.016
ENTPD4	1.26	0.92-1.74	0.155
EPB41L1	1.26	0.94-1.69	0.128
ERBB2	1.18	0.98-1.42	0.083
ERICH1	1.33	0.88-2	0.177
ETNK1	0.69	0.46-1.03	0.072
EVC	1.2	1.01-1.42	0.043
EVC2	1.2	1-1.44	0.047
EXOC3	1.71	0.97-3	0.064
EXTL3	1.2	0.95-1.52	0.134
FABP5	1.16	1.03-1.31	0.016
FAM134A	1.74	0.97-3.12	0.062
FAM134B	1.24	0.93-1.66	0.14
FAM134C	1.7	0.9-3.19	0.102
FAM151B	1.39	0.84-2.29	0.199
FAM172A	1.66	1.07-2.6	0.025
FAM204A	0.64	0.41-0.98	0.042
FAM49B	0.75	0.54-1.05	0.095
FAM90A1	1.39	1.05-1.84	0.023
FBXL18	1.28	0.97-1.71	0.085
FBXL5	0.77	0.52-1.14	0.198
FBXO18	0.77	0.54-1.09	0.143
FBXO6	1.19	0.92-1.54	0.195
FCN3	1.37	1.07-1.75	0.012
FGF11	1.19	0.93-1.51	0.163
FGFR1	1.47	1.16-1.85	0.001
FGFR1OP2	0.7	0.41-1.18	0.182
FKBP1B	1.46	1.11-1.93	0.008
FKRP	1.3	0.94-1.82	0.115
FLII	1.52	1.02-2.26	0.039
FLRT2	1.12	0.97-1.29	0.124
FRAT2	0.52	0.33-0.81	0.004
FSCN2	1.46	0.84-2.52	0.177
GABARAPL2	0.8	0.59-1.08	0.138
GAL3ST2	2.59	1.45-4.63	0.001
GALNS	1.32	0.92-1.88	0.132
GALNT11	1.96	1.32-2.91	0.001
GANAB	1.59	1.01-2.49	0.043
GATA4	1.2	1.03-1.39	0.017
GBAS	0.89	0.77-1.02	0.094
GET4	1.38	0.92-2.07	0.118
GGACT	1.17	0.93-1.46	0.175
GHDC	1.86	1.29-2.68	0.001
GLO1	0.64	0.4-1	0.051
GMPPB	1.45	0.95-2.22	0.089
GNG11	1.13	0.94-1.35	0.194
GOLGA3	1.22	0.91-1.64	0.181
GPAA1	1.5	0.99-2.29	0.059
GPI	1.34	0.99-1.81	0.059
GPN2	1.54	0.9-2.63	0.116
GPR153	1.17	1-1.36	0.05
GPR182	0.13	0.01-2.07	0.149
GPRASP1	1.29	1.05-1.58	0.013
GRB10	1.13	0.96-1.34	0.136
GREB1	1.18	0.97-1.44	0.098
GSG1	1.41	0.86-2.31	0.169
H1F0	0.73	0.58-0.92	0.008
H6PD	1.31	1.03-1.65	0.026
HARS2	1.5	0.92-2.47	0.105
HAUS4	0.75	0.53-1.07	0.109
HBP1	0.65	0.41-1.05	0.077
HDAC4	0.72	0.51-1.01	0.06
HEXA	1.45	0.98-2.13	0.061
HEY2	0.86	0.68-1.08	0.193
HGH1	1.35	0.96-1.9	0.083
HGSNAT	1.66	1.16-2.4	0.006
HMGCL	1.42	0.91-2.2	0.118
HPDL	1.4	0.92-2.14	0.119
HPRT1	1.21	0.92-1.6	0.169
HSBP1L1	1.26	0.98-1.62	0.074
HTATIP2	1.21	1.01-1.44	0.034
ICMT	1.31	0.91-1.89	0.15
IGDCC4	1.15	0.94-1.41	0.17
IGFBP5	1.19	1.02-1.4	0.032
IKZF5	0.63	0.42-0.93	0.02
IL17RE	1.39	0.92-2.11	0.115
IL7	1.28	0.98-1.69	0.074
IMMP2L	1.31	0.96-1.78	0.088
IMPDH1	1.48	1.12-1.97	0.006
INTS1	1.19	0.94-1.52	0.15
IPO11	0.49	0.25-0.95	0.036
IQSEC1	1.41	1.05-1.88	0.022
IRF2BPL	1.33	0.98-1.81	0.066
IRS1	1.2	0.96-1.5	0.116
IRX5	1.24	1.01-1.52	0.04
ISPD	1.52	1.03-2.25	0.033
ITFG3	1.53	1.01-2.3	0.042
ITGB6	1.36	1.01-1.83	0.045
JMJD8	1.39	0.96-2.01	0.078
JUN	1.2	0.95-1.51	0.122
KHNYN	1.34	1.06-1.7	0.014
KIAA0319L	1.42	0.97-2.08	0.075
KIAA1456	1.14	0.98-1.33	0.087
KIAA1614	1.21	0.94-1.54	0.134
KIF26B	1.15	0.97-1.37	0.118
KIFC3	1.31	0.98-1.75	0.069
KIRREL2	1.17	0.97-1.41	0.103
KLF16	1.27	0.92-1.77	0.15
KLHDC9	1.3	1.06-1.59	0.011
KRBA1	1.57	1.11-2.23	0.011
LAMA1	1.15	1.02-1.3	0.026
LAYN	1.21	0.93-1.57	0.152
LDOC1L	0.82	0.62-1.09	0.17
LIMK1	1.59	1.18-2.14	0.002
LMO7	1.37	1.03-1.83	0.029
LMTK2	1.39	1.04-1.85	0.025
LOXL3	1.35	0.94-1.94	0.103
LPCAT1	1.42	1.03-1.96	0.03
LRRC66	1.17	0.96-1.44	0.123
LTBP4	0.89	0.77-1.04	0.136
LYRM9	1.2	0.92-1.57	0.178
MAFG	1.29	0.94-1.77	0.109
MAFK	1.29	1.01-1.64	0.038
MAGEL2	1.12	0.95-1.31	0.176
MAP2K3	1.69	1.19-2.39	0.003
MAP3K13	0.74	0.52-1.05	0.095
MAP3K7CL	1.21	1.02-1.43	0.031
MAPK1	0.77	0.53-1.1	0.152
2023-03-08	0.83	0.64-1.07	0.157
MARVELD1	1.42	1.13-1.79	0.003
MBLAC1	1.71	1.17-2.5	0.006
MBOAT1	1.21	0.92-1.6	0.167
ME1	1.13	0.97-1.31	0.117
MED7	1.4	0.88-2.23	0.151
MEF2BNB_MEF2B	0.52	0.3-0.9	0.019
MESDC1	1.42	1.03-1.97	0.033
MFSD12	1.4	0.97-2.03	0.071
MGARP	1.14	0.95-1.37	0.154
MGMT	1.22	1.01-1.49	0.043
MGP	1.09	0.96-1.23	0.191
MIER1	0.48	0.3-0.76	0.002
MKRN1	1.81	1.13-2.9	0.013
MLEC	1.36	0.98-1.88	0.062
MLIP	0.87	0.76-1	0.042
MLXIP	1.29	0.97-1.7	0.08
MNT	1.29	0.9-1.84	0.171
MOB2	2.07	1.2-3.57	0.009
MOGS	1.42	0.87-2.34	0.164
MPRIP	1.31	0.95-1.8	0.104
MROH1	1.43	1.05-1.96	0.023
MRPL36	1.52	1.01-2.28	0.043
MRPS17	0.89	0.77-1.04	0.134
MRPS6	1.39	1.01-1.91	0.045
MSTO1	1.47	0.95-2.29	0.086
MT1F	1.29	1.07-1.56	0.008
MTCL1	1.15	0.94-1.42	0.175
MTHFS	1.56	1.08-2.25	0.017
MTMR14	2.15	0.99-4.67	0.053
MUC12	1.29	1.07-1.56	0.008
MXRA7	1.19	0.95-1.49	0.125
MYL12A	1.29	0.99-1.68	0.055
MYLPF	3.09	1.22-7.83	0.017
MYO1C	1.43	1.07-1.92	0.016
N6AMT2	1.25	0.93-1.68	0.132
NAT10	1.45	0.95-2.19	0.082
NCK1	0.61	0.36-1.04	0.068
NFE2L1	1.27	0.92-1.75	0.153
NINL	1.19	1.01-1.41	0.039
NMB	0.86	0.74-1	0.056
NMD3	0.51	0.31-0.86	0.011
NOS1AP	0.86	0.69-1.08	0.188
NQO2	1.59	1.06-2.38	0.026
NUDC	1.49	0.91-2.46	0.113
NUDT19	1.38	0.95-1.99	0.087
NUP210	1.15	0.94-1.4	0.172
NUP98	1.39	0.84-2.3	0.193
NXT2	0.77	0.56-1.07	0.119
OBSCN	1.17	0.97-1.4	0.101
OBSL1	1.42	1.03-1.95	0.03
OGFR	1.34	0.94-1.9	0.107
OR7D2	1.22	0.91-1.65	0.179
ORAI2	1.55	1.1-2.18	0.011
ORMDL3	1.4	0.93-2.12	0.11
OSBPL5	1.71	1.21-2.42	0.002
OTOF	1.2	0.93-1.56	0.168
OXR1	0.74	0.49-1.12	0.155
PATZ1	0.73	0.53-1	0.05
PCBD1	1.31	0.93-1.85	0.127
PCDHA7	1.35	0.99-1.84	0.061
PCDHB12	1.24	1-1.53	0.047
PCDHB14	1.17	0.96-1.41	0.116
PCDHB3	1.15	1.01-1.31	0.031
PCDHGA4	1.14	0.97-1.33	0.111
PCK1	1.31	0.99-1.72	0.058
PDLIM3	1.16	0.96-1.39	0.121
PFKL	1.34	0.94-1.91	0.111
PHF11	1.23	0.95-1.58	0.111
PHRF1	1.36	1.03-1.81	0.032
PIEZO1	1.17	0.93-1.47	0.177
PINLYP	1.22	1.01-1.47	0.04
PIP5KL1	0.72	0.51-1.01	0.059
PIR	1.2	1-1.45	0.055
PLA2G4A	0.85	0.69-1.07	0.162
PLAT	1.16	1-1.36	0.052
PLEKHG5	1.26	1-1.59	0.05
PLOD3	1.51	1.15-1.98	0.003
PLXNA1	1.27	1-1.62	0.05
POC1B	0.72	0.45-1.13	0.155
PODXL	1.25	0.97-1.61	0.087
POFUT2	1.34	0.95-1.88	0.093
POM121C	1.33	0.97-1.81	0.072
PORCN	1.47	0.84-2.59	0.181
PPA1	0.74	0.52-1.06	0.1
PPCS	1.36	1.02-1.82	0.036
PPP1R13B	1.25	0.94-1.67	0.129
PPT1	0.8	0.56-1.13	0.196
PQLC1	1.48	0.95-2.32	0.084
PQLC2	1.97	1.26-3.08	0.003
PQLC3	1.29	0.98-1.7	0.068
PRDX3	0.75	0.53-1.06	0.109
PRPF19	0.71	0.42-1.19	0.192
PRPF8	1.24	0.9-1.7	0.187
PRR33	2.19	1.24-3.85	0.007
PTCH1	0.88	0.76-1.02	0.091
PTPN1	1.38	0.87-2.18	0.173
PTPRF	1.19	0.96-1.47	0.111
PVR	1.26	0.92-1.72	0.145
PYY	3.71	1.36-10.14	0.01
RAB11FIP5	1.6	1.14-2.26	0.007
RAB15	1.31	1.02-1.7	0.037
RAB18	0.65	0.41-1.03	0.066
RAB1A	1.66	0.78-3.57	0.191
RAB31	1.31	0.94-1.85	0.115
RAB3D	1.33	1.01-1.75	0.042
RAB4A	0.64	0.43-0.96	0.03
RAD51D	1.53	0.88-2.66	0.135
RADIL	1.19	0.92-1.54	0.18
RAI1	1.24	0.96-1.61	0.097
RAP1GAP2	1.18	1-1.4	0.05
RARA	1.35	0.99-1.83	0.058
RASA3	1.2	0.91-1.59	0.19
RB1	0.82	0.63-1.07	0.139
RCHY1	0.62	0.37-1.05	0.073
REEP3	0.68	0.47-0.98	0.039
RELT	1.45	0.93-2.28	0.103
RGAG4	1.21	0.96-1.52	0.1
RGCC	0.78	0.6-1	0.054
RHBDF1	1.21	0.96-1.51	0.103
RHOBTB2	1.46	1.05-2.02	0.023
RIMBP3	2.17	0.97-4.87	0.06
RNF10	1.92	0.97-3.83	0.062
RNF212	0.86	0.71-1.04	0.117
RNF39	0.71	0.53-0.96	0.025
RP11_196G11.1	13.63	1.09-170.28	0.043
RP11_54C4.3	1.24	0.9-1.7	0.19
RPL39L	1.33	1.15-1.54	0
RRBP1	1.16	0.93-1.45	0.185
RWDD2B	0.61	0.42-0.88	0.008
RXRA	1.27	0.96-1.68	0.094
S100A4	1.15	0.99-1.33	0.069
S100B	1.12	0.95-1.31	0.179
SALL2	0.84	0.65-1.08	0.172
SARAF	1.47	0.9-2.38	0.121
SBDS	1.52	1.01-2.29	0.047
SCARB1	1.37	0.94-1.98	0.098
SCG5	1.32	1.05-1.65	0.016
SCMH1	1.34	0.89-2.02	0.166
SDC2	1.25	1.04-1.49	0.016
SDHC	0.51	0.27-0.97	0.041
SDK1	1.15	1.01-1.32	0.035
SDK2	1.21	1.01-1.44	0.034
SEC11C	1.22	0.94-1.59	0.144
SELM	1.15	0.96-1.38	0.126
SEMA4F	1.54	1.2-1.99	0.001
SEMA6A	0.85	0.68-1.06	0.143
2023-09-05	1.18	0.92-1.51	0.183
SERP1	0.7	0.42-1.15	0.158
SETD8	1.62	1.01-2.6	0.046
SFXN3	1.41	0.93-2.12	0.105
SGCB	1.24	0.99-1.57	0.066
SH3BP2	1.61	1.14-2.26	0.006
SHARPIN	1.57	0.96-2.57	0.071
SHROOM2	1.16	0.99-1.37	0.071
SLC12A9	1.36	0.99-1.87	0.058
SLC16A13	1.76	1.18-2.62	0.005
SLC22A23	1.2	0.94-1.54	0.139
SLC25A20	1.43	1.08-1.89	0.012
SLC25A22	1.48	1.1-2.01	0.011
SLC25A5	0.71	0.49-1.03	0.074
SLC29A4	1.15	0.95-1.4	0.15
SLC35F6	1.6	1.03-2.5	0.038
SLC35G2	1.28	1.03-1.59	0.028
SLC40A1	0.78	0.63-0.95	0.016
SLC43A1	0.74	0.53-1.03	0.078
SLC45A1	1.39	1.06-1.83	0.018
SLC4A3	1.49	1.14-1.95	0.003
SLC52A2	1.51	1.01-2.26	0.044
SLC7A1	0.85	0.67-1.08	0.186
SMIM20	1.42	1.01-2.01	0.043
SMURF1	1.39	1-1.92	0.052
SNAP23	0.61	0.37-1	0.049
SND1	1.3	0.94-1.8	0.112
SNURF	0.56	0.28-1.14	0.109
SNX6	0.74	0.49-1.12	0.151
SPARC	1.22	0.91-1.64	0.189
SPRED2	1.22	0.98-1.54	0.081
SRPR	1.45	0.91-2.31	0.113
ST3GAL6	0.73	0.54-0.99	0.041
STARD3	1.71	0.91-3.21	0.097
STX4	1.48	0.88-2.48	0.139
SVIP	1.16	0.97-1.38	0.101
SYNE3	1.18	0.94-1.47	0.153
SYVN1	1.42	0.9-2.25	0.136
TATDN2	1.44	0.91-2.28	0.122
TAX1BP3	1.55	1.16-2.08	0.003
TBC1D15	0.61	0.36-1.02	0.058
TCF7L1	0.85	0.69-1.05	0.14
TCOF1	1.33	0.97-1.82	0.072
TCTA	1.37	1-1.9	0.053
TEAD3	1.15	0.94-1.4	0.166
TECPR1	1.28	0.95-1.72	0.111
TENM3	1.07	0.97-1.17	0.17
TGDS	0.77	0.53-1.11	0.155
THAP4	1.57	0.82-3.03	0.176
TIMP4	0.84	0.73-0.97	0.019
TLR9	0.27	0.04-1.92	0.19
TMEM110	1.75	1.01-3.05	0.047
TMEM115	1.73	1-3.01	0.052
TMEM214	1.5	1-2.26	0.053
TMEM44	1.35	0.97-1.88	0.071
TMEM70	1.26	0.92-1.73	0.149
TMEM79	1.37	0.92-2.05	0.119
TMEM81	1.3	0.93-1.82	0.129
TMEM8A	1.31	0.88-1.95	0.183
TMSB10	1.22	0.96-1.54	0.098
TOB2	0.77	0.58-1	0.053
TOMM7	1.36	0.97-1.91	0.079
TPSG1	2.98	0.95-9.28	0.06
TRAF1	1.14	0.95-1.36	0.15
TRAF2	1.31	0.9-1.9	0.156
TRAF3	1.28	0.95-1.74	0.11
TRAM2	1.26	0.97-1.63	0.086
TRIM62	0.82	0.62-1.07	0.15
TRUB1	0.67	0.46-0.98	0.039
TSPAN6	0.81	0.64-1.03	0.09
TSR2	1.36	0.86-2.16	0.191
TSSC4	1.63	1.07-2.48	0.024
TUFT1	1.42	1.05-1.92	0.023
UBA3	0.63	0.36-1.1	0.102
UBE2Q1	1.48	0.85-2.6	0.168
UBE2Z	2.3	1.14-4.63	0.02
UBE3B	1.38	0.85-2.25	0.189
UBQLN4	0.68	0.48-0.97	0.034
ULK1	1.28	0.91-1.8	0.158
UNC45A	1.4	0.95-2.08	0.09
USP21	0.73	0.47-1.11	0.142
USP35	1.37	0.9-2.08	0.142
VAMP5	1.15	0.96-1.37	0.126
VARS	0.81	0.59-1.12	0.197
VMP1	1.35	1-1.83	0.051
VPS26A	0.64	0.4-1.05	0.076
VPS51	0.72	0.48-1.09	0.122
VPS52	0.57	0.34-0.95	0.033
WNT3A	60.77	0.65-5673.91	0.076
WWC3	1.27	0.94-1.71	0.114
XYLT2	1.54	0.98-2.41	0.06
YARS	0.72	0.46-1.12	0.148
YIPF1	1.46	0.94-2.26	0.093
YWHAG	1.81	1.23-2.68	0.003
ZBED3	0.79	0.61-1.02	0.066
ZBED6CL	1.25	1.08-1.44	0.002
ZC3HAV1L	1.16	0.93-1.46	0.191
ZDHHC18	1.7	1.13-2.56	0.012
ZDHHC20	0.72	0.5-1.04	0.079
ZDHHC5	1.59	0.94-2.71	0.085
ZMIZ2	1.26	0.95-1.68	0.109
ZMYM6NB	1.25	0.91-1.71	0.175
ZNF18	1.53	0.97-2.42	0.067
ZNF256	0.82	0.61-1.11	0.194
ZNF274	0.78	0.58-1.05	0.105
ZNF282	1.29	0.92-1.81	0.135
ZNF316	1.17	0.94-1.46	0.156
ZNF395	1.3	1.02-1.66	0.037
ZNF408	1.44	0.87-2.38	0.151
ZNF468	0.78	0.58-1.06	0.108
ZNF513	1.45	0.91-2.3	0.118
ZNF517	1.29	0.89-1.88	0.184
ZNF552	0.75	0.51-1.12	0.165
ZNF618	1.2	0.97-1.49	0.089
ZNF713	0.89	0.77-1.03	0.131
ZNF746	1.59	1.04-2.43	0.033
ZNF747	1.47	0.84-2.56	0.179
ZNF777	1.27	0.88-1.82	0.197
ZNF778	0.84	0.65-1.09	0.198
ZNF79	0.76	0.5-1.15	0.191
ZNF862	1.28	0.94-1.74	0.115
ZYX	1.18	0.94-1.48	0.164

## Sheet: HNSC
characteristics	Hazard.Ratio	CI95	P.Value
A3GALT2	0.05	0-0.49	0.011
AAAS	0.68	0.43-1.07	0.095
AACS	0.69	0.47-1.01	0.053
AANAT	0.39	0.12-1.23	0.109
AASDH	1.65	0.99-2.75	0.055
ABCA13	0.92	0.83-1.03	0.142
ABCB9	0.8	0.58-1.1	0.166
ABHD13	1.49	0.92-2.42	0.106
ABHD14B	0.69	0.47-1.01	0.056
ABHD17B	0.69	0.46-1.05	0.081
ABHD6	0.77	0.55-1.07	0.114
ABHD8	0.69	0.51-0.92	0.013
AC006116.20	0.78	0.57-1.07	0.126
AC024060.1	0	0-1.13	0.054
AC073657.1	0.08	0.01-0.7	0.023
AC087350.1	0.18	0.03-1.21	0.078
AC090154.1	0.18	0.02-1.41	0.102
AC091180.1	0	0-0.44	0.026
ACAD11	0.37	0.15-0.93	0.034
ACADVL	0.72	0.47-1.08	0.113
ACAP3	0.76	0.51-1.13	0.176
ACBD5	0.73	0.47-1.13	0.161
ACBD7	0.71	0.51-1	0.048
ACPT	0.18	0.04-0.77	0.021
ACRC	0.58	0.28-1.21	0.146
ACSL3	1.77	1.09-2.87	0.021
ACTL10	0.63	0.43-0.94	0.022
ACTN1	1.19	0.95-1.49	0.138
ACTR3C	0.69	0.48-0.99	0.044
ACY1	0.67	0.43-1.05	0.079
AD000671.6	0.03	0-4.42	0.165
ADAM22	0.85	0.71-1.03	0.09
ADAM32	0.59	0.33-1.06	0.079
ADAMTS15	1.13	0.97-1.31	0.11
ADAMTS17	0.74	0.58-0.94	0.015
ADARB2	0.83	0.69-1	0.046
ADCK1	0.71	0.48-1.07	0.103
ADCY6	0.85	0.7-1.02	0.073
ADH6	0.7	0.42-1.19	0.187
ADIPOR2	0.64	0.4-1.05	0.076
ADNP2	0.75	0.53-1.07	0.114
AFF3	0.55	0.38-0.8	0.002
AGAP1	0.77	0.55-1.08	0.125
AGAP10	0.68	0.45-1.04	0.074
AGAP4	0.66	0.37-1.18	0.162
AGAP5	0.16	0.02-1.32	0.089
AGAP6	0.78	0.55-1.1	0.159
AGBL3	0.59	0.34-1.04	0.067
AGFG1	1.46	0.92-2.32	0.112
AGMAT	0.81	0.58-1.12	0.195
AGMO	1.37	0.99-1.91	0.059
AGO4	0.66	0.48-0.91	0.012
AGPAT2	1.48	1.08-2.03	0.015
AGPAT4	1.17	0.93-1.46	0.179
AGPS	1.69	1.1-2.62	0.017
AGTRAP	1.29	0.93-1.79	0.126
AHNAK2	1.16	0.95-1.43	0.144
AK4	1.52	1.18-1.95	0.001
AKAP17A	0.71	0.52-0.98	0.035
AKR1A1	0.64	0.4-1.02	0.063
AKR1E2	0.73	0.54-0.98	0.038
AL358852.1	0.32	0.08-1.25	0.101
ALDH2	0.87	0.7-1.07	0.192
ALDH3A1	0.9	0.81-1	0.058
ALDH3A2	0.75	0.54-1.05	0.09
ALDH6A1	0.82	0.62-1.08	0.161
ALKBH6	0.59	0.37-0.95	0.032
AMIGO1	0.84	0.66-1.07	0.166
AMIGO2	1.23	1.04-1.46	0.014
AMMECR1L	1.59	0.83-3.06	0.166
AMY2B	0.82	0.6-1.11	0.197
ANAPC16	1.42	0.93-2.17	0.1
ANKFN1	1.74	1.21-2.49	0.003
ANKH	0.81	0.63-1.04	0.1
ANKLE1	0.8	0.6-1.07	0.133
ANKRD13C	0.53	0.28-1.03	0.06
ANKRD16	0.6	0.37-0.97	0.036
ANKRD26	0.65	0.44-0.94	0.022
ANKRD29	0.78	0.65-0.95	0.011
ANKRD34B	0.79	0.58-1.09	0.154
ANKRD36	0.69	0.47-1	0.053
ANKRD36B	0.71	0.43-1.14	0.158
ANKRD65	0.86	0.72-1.02	0.075
ANKS1B	0.37	0.14-0.99	0.048
ANKS3	0.7	0.5-0.98	0.038
ANO1	1.23	1.08-1.4	0.002
ANO8	0.57	0.4-0.8	0.001
ANO9	0.84	0.69-1.03	0.096
ANP32A	1.38	0.85-2.25	0.197
AP000275.65	11.14	2.57-48.25	0.001
AP000295.9	12.3	0.49-308.49	0.127
AP006285.2	0.3	0.05-1.67	0.169
AP3B2	0.85	0.7-1.04	0.12
APBB3	0.76	0.54-1.08	0.126
APC2	0.71	0.51-0.97	0.033
APCDD1L	1.11	0.96-1.29	0.168
APH1A	1.67	0.93-3	0.088
APITD1_CORT	0.54	0.24-1.19	0.127
APP	1.47	1.03-2.11	0.033
APPL2	0.7	0.45-1.07	0.102
AR	0.89	0.76-1.05	0.181
AREG	1.21	1.06-1.38	0.004
ARFIP1	1.4	0.85-2.29	0.182
ARHGAP26	0.84	0.7-1	0.052
ARHGAP33	0.77	0.61-0.98	0.031
ARHGDIA	1.7	0.95-3.04	0.074
ARHGEF26	0.86	0.75-0.99	0.034
ARHGEF33	0.54	0.34-0.86	0.01
ARID3C	0.16	0.03-0.85	0.032
ARIH2OS	0.56	0.26-1.2	0.134
ARL17A	0.48	0.19-1.16	0.103
ARL4D	1.44	1.15-1.81	0.002
ARL6IP4	0.66	0.36-1.22	0.189
ARL6IP6	1.26	0.89-1.8	0.195
ARL8A	1.8	1.06-3.06	0.03
ARNT2	0.88	0.76-1.01	0.068
ARPC2	1.91	1.04-3.51	0.036
ARR3	0.27	0.06-1.21	0.087
ARSG	0.75	0.54-1.05	0.09
ARSI	1.17	1-1.38	0.049
ARSJ	1.23	0.99-1.52	0.062
ARVCF	0.8	0.61-1.06	0.119
ASB13	0.79	0.56-1.12	0.192
ASB9	0.73	0.53-1	0.047
ASCL2	0.86	0.68-1.08	0.189
ASIC3	0.69	0.4-1.19	0.18
ASMTL	0.66	0.47-0.91	0.012
ASRGL1	0.84	0.67-1.05	0.132
ASTN2	0.82	0.69-0.97	0.024
ATAD1	2.2	1.24-3.91	0.007
ATF2	1.38	0.91-2.1	0.129
ATF6	1.75	0.91-3.37	0.092
ATG16L1	1.49	0.85-2.62	0.161
ATG16L2	0.68	0.52-0.9	0.008
ATXN7L2	0.69	0.48-0.99	0.045
AVIL	0.73	0.5-1.06	0.096
B3GALT5	0.88	0.75-1.02	0.091
BAALC	1.16	0.97-1.39	0.107
BAIAP2L2	1.16	0.95-1.42	0.141
BAK1	1.68	1.22-2.32	0.002
BBS1	0.65	0.37-1.15	0.136
BCAR1	1.55	1.06-2.28	0.024
BCAR3	1.31	1.04-1.64	0.021
BCAS3	0.77	0.53-1.12	0.167
BCAT2	0.82	0.61-1.1	0.192
BCDIN3D	0.64	0.37-1.11	0.11
BCKDK	1.54	0.8-2.96	0.199
BCL11A	0.83	0.68-1.02	0.081
BCL2	0.82	0.69-0.97	0.018
BCL2L2_PABPN1	1.68	0.96-2.96	0.071
BEAN1	1.36	0.96-1.92	0.085
BEND3	0.72	0.48-1.09	0.118
BEND5	0.68	0.47-0.99	0.042
BHMT	0.63	0.33-1.2	0.162
BIVM	1.33	0.95-1.87	0.092
BMF	0.74	0.59-0.93	0.01
BMP8B	0.78	0.61-1.01	0.057
BNC1	1.22	0.97-1.54	0.09
BRICD5	0.75	0.52-1.09	0.13
BRMS1	1.3	0.93-1.83	0.127
BSDC1	0.7	0.42-1.16	0.162
BTAF1	0.76	0.54-1.08	0.131
BTBD11	1.22	0.98-1.51	0.076
BTBD3	0.73	0.51-1.05	0.086
BTC	1.25	0.98-1.6	0.068
BTG1	0.68	0.49-0.95	0.022
BTG3	0.81	0.58-1.12	0.198
BTNL9	0.87	0.76-1.01	0.073
BZRAP1	0.8	0.66-0.97	0.024
BZW1	1.85	1.17-2.92	0.008
C10orf131	0.04	0-1.03	0.052
C10orf35	1.28	0.98-1.68	0.073
C11orf24	1.36	0.94-1.96	0.106
C11orf42	0.02	0-0.27	0.004
C11orf54	0.76	0.52-1.11	0.15
C11orf85	0.49	0.26-0.91	0.025
C12orf29	0.67	0.41-1.09	0.107
C12orf42	0.37	0.1-1.46	0.156
C12orf5	0.64	0.39-1.05	0.074
C12orf56	0.79	0.64-0.96	0.016
C12orf57	0.75	0.54-1.04	0.085
C12orf79	0.61	0.35-1.09	0.093
C14orf28	0.6	0.35-1.04	0.067
C15orf41	0.73	0.49-1.09	0.127
C15orf65	0.33	0.16-0.72	0.005
C16orf52	1.55	0.9-2.68	0.114
C16orf58	1.49	0.89-2.49	0.131
C16orf72	1.84	1.04-3.26	0.035
C16orf93	0.43	0.21-0.86	0.017
C17orf104	0.51	0.28-0.92	0.025
C17orf49	0.63	0.35-1.15	0.131
C17orf97	0.81	0.59-1.11	0.189
C18orf25	0.67	0.44-1.02	0.062
C19orf33	1.16	0.98-1.38	0.091
C19orf44	0.74	0.51-1.09	0.129
C19orf45	0.23	0.07-0.78	0.019
C19orf57	0.69	0.55-0.87	0.002
C19orf68	0.78	0.55-1.11	0.164
C19orf73	0.53	0.26-1.11	0.091
C1GALT1C1	1.86	1.14-3.02	0.013
C1orf168	0.55	0.28-1.09	0.088
C1orf198	0.58	0.38-0.9	0.014
C1QL3	0.62	0.35-1.08	0.09
C1QTNF4	0.43	0.19-0.94	0.035
C20orf96	0.78	0.59-1.04	0.087
C2CD2	0.78	0.59-1.03	0.081
C2CD4D	0.69	0.42-1.15	0.155
C2CD5	0.65	0.47-0.91	0.013
C2orf15	0.66	0.44-0.99	0.045
C2orf72	1.4	0.85-2.33	0.189
C3orf14	0.82	0.67-1.01	0.064
C3orf58	0.81	0.66-0.99	0.043
C3orf70	0.78	0.64-0.95	0.013
C4orf19	0.84	0.68-1.03	0.097
C5	0.87	0.7-1.07	0.181
C5orf63	1.36	0.93-2	0.114
C6orf165	0.03	0-0.45	0.01
C6orf211	1.53	0.9-2.6	0.112
C6orf226	0.74	0.49-1.12	0.16
C8G	0.78	0.58-1.05	0.105
C8orf4	0.86	0.75-0.99	0.038
C9orf172	0.8	0.63-1.03	0.081
C9orf3	0.73	0.52-1.02	0.069
CA11	0.74	0.58-0.96	0.022
CA12	1.18	1.01-1.39	0.043
CA5B	0.63	0.43-0.91	0.014
CAB39	1.61	1.1-2.35	0.014
CACFD1	0.79	0.55-1.12	0.189
CACNA1D	0.63	0.44-0.92	0.017
CACNA2D3	0.73	0.56-0.94	0.016
CACNB3	0.77	0.54-1.09	0.136
CACNB4	0.72	0.51-1.01	0.06
CADPS2	0.88	0.74-1.06	0.179
CALM3	1.47	0.88-2.47	0.143
CAMK1D	0.81	0.66-0.99	0.038
CAMK2D	1.39	0.96-2	0.078
CAMK2N1	1.36	1.11-1.66	0.003
CAMK2N2	0.71	0.46-1.09	0.12
CAMKK1	0.74	0.56-0.99	0.042
CANT1	1.65	0.89-3.07	0.115
CAPN10	0.73	0.47-1.15	0.179
CAPN12	0.71	0.52-0.98	0.038
CAPS	0.83	0.66-1.03	0.094
CARD10	1.19	0.94-1.49	0.143
CARD6	1.17	0.93-1.47	0.182
CASP16	0.19	0.03-1.33	0.095
CASP4	1.42	1.08-1.87	0.012
CASP8	2.16	1.33-3.49	0.002
CASR	0.15	0.01-1.66	0.123
CATSPER2	0.74	0.51-1.07	0.106
CAV1	1.27	1.09-1.48	0.003
CAV2	1.65	1.26-2.16	0
CBFA2T2	0.75	0.57-0.98	0.038
CBLN2	0.82	0.66-1.01	0.062
CBLN3	0.73	0.53-1.02	0.065
CBS	0.78	0.55-1.11	0.167
CBWD1	0.72	0.51-1.01	0.058
CBX2	0.87	0.71-1.07	0.196
CBX5	0.86	0.68-1.08	0.193
CBX7	0.86	0.72-1.04	0.113
CBY3	0.06	0-0.83	0.036
CCBE1	1.28	1.08-1.52	0.004
CCBL2	0.7	0.47-1.05	0.088
CCDC142	0.74	0.49-1.11	0.145
CCDC146	0.86	0.7-1.06	0.156
CCDC150	0.79	0.58-1.09	0.153
CCDC157	0.68	0.41-1.12	0.126
CCDC159	0.5	0.3-0.83	0.008
CCDC18	0.79	0.58-1.09	0.157
CCDC180	0.47	0.21-1.06	0.068
CCDC28B	0.76	0.58-1	0.049
CCDC39	0.72	0.48-1.08	0.116
CCDC64	0.82	0.66-1.02	0.079
CCDC65	0.51	0.27-0.96	0.036
CCDC7	0.57	0.31-1.03	0.064
CCDC74A	0.85	0.67-1.08	0.177
CCDC77	0.78	0.56-1.08	0.135
CCDC78	0.81	0.59-1.1	0.173
CCNE1	0.71	0.48-1.05	0.089
CCNE2	0.83	0.65-1.07	0.146
CCNI2	0.75	0.57-1	0.053
CCNL2	0.79	0.59-1.06	0.118
CCR10	0.66	0.39-1.11	0.115
CCRN4L	1.31	0.98-1.74	0.067
CD151	1.36	0.99-1.87	0.055
CD44	1.57	1.09-2.25	0.015
CDC42BPB	1.31	0.94-1.82	0.108
CDC42EP4	0.79	0.62-1.01	0.058
CDH23	0.88	0.74-1.05	0.164
CDH24	0.79	0.58-1.08	0.139
CDH3	1.18	0.94-1.49	0.158
CDHR5	0.34	0.08-1.4	0.136
CDIP1	0.72	0.52-1.01	0.057
CDK11B	0.69	0.4-1.18	0.177
CDK18	1.22	0.96-1.55	0.1
CDK19	0.59	0.4-0.87	0.008
CDK3	0.42	0.18-0.99	0.047
CDK6	1.33	1.1-1.61	0.004
CDKN1C	0.87	0.72-1.06	0.167
CDKN2A	0.9	0.82-0.98	0.016
CDKN2C	0.89	0.75-1.04	0.146
CDON	0.77	0.61-0.98	0.03
CDRT1	0.65	0.34-1.25	0.198
CDRT4	0.35	0.14-0.87	0.024
CEBPB	1.26	0.93-1.7	0.141
CEBPD	0.77	0.6-0.99	0.043
CELA2B	0.17	0.02-1.41	0.101
CENPBD1	1.92	1.2-3.08	0.006
CENPC	0.77	0.55-1.08	0.131
CENPI	1.31	0.93-1.84	0.124
CEP152	0.8	0.6-1.07	0.127
CEP83	0.76	0.51-1.12	0.161
CERK	0.66	0.47-0.92	0.014
CES3	0.81	0.62-1.05	0.107
CFAP44	0.81	0.65-1	0.053
CFL1	1.64	1.06-2.55	0.028
CGNL1	0.82	0.69-0.98	0.027
CHAD	0.58	0.34-0.98	0.042
CHAF1A	0.82	0.63-1.07	0.14
CHD1L	1.72	1.13-2.64	0.012
CHD3	0.65	0.46-0.92	0.016
CHDH	0.81	0.67-0.97	0.026
CHFR	0.81	0.63-1.05	0.11
CHKB	0.68	0.45-1.03	0.071
CHPF	1.37	1.07-1.75	0.014
CHRM3	1.14	1-1.31	0.055
CHRNB4	1.15	0.95-1.39	0.165
CHTF18	0.83	0.63-1.1	0.193
CIDEB	0.71	0.46-1.09	0.114
CIR1	1.61	1.02-2.55	0.042
CIRBP	0.69	0.47-1.01	0.058
CKAP2	1.38	0.94-2.02	0.103
CLASRP	0.73	0.51-1.03	0.076
CLCA2	1.18	1.01-1.38	0.039
CLDN10	0.87	0.75-1.02	0.078
CLDN2	0.52	0.23-1.19	0.124
CLDN3	0.9	0.77-1.04	0.162
CLDND2	0.3	0.09-0.99	0.047
CLEC1A	0.78	0.57-1.06	0.117
CLEC2L	0.77	0.58-1.04	0.088
CLGN	0.82	0.68-0.99	0.043
CLIC6	0.9	0.77-1.05	0.173
CLIP2	0.81	0.63-1.05	0.111
CLIP3	0.82	0.65-1.04	0.105
CLIP4	1.39	0.99-1.95	0.054
CLYBL	1.33	0.98-1.82	0.068
CMIP	1.48	0.94-2.34	0.09
CNKSR2	0.62	0.35-1.1	0.1
CNKSR3	0.78	0.6-1.02	0.068
CNNM3	0.8	0.59-1.09	0.164
CNTD1	0.56	0.36-0.88	0.011
CNTNAP2	0.89	0.8-0.99	0.039
COL19A1	0.79	0.63-1	0.052
COL21A1	0.86	0.73-1.01	0.071
COL23A1	0.8	0.63-1.02	0.069
COL4A4	0.88	0.76-1.03	0.105
COL4A5	1.37	1.07-1.76	0.012
COL4A6	1.19	1.05-1.35	0.008
COL9A2	0.84	0.71-0.99	0.033
COPG2	0.71	0.49-1.02	0.066
CORT	0.37	0.09-1.59	0.182
CPA4	1.13	1-1.27	0.057
CPAMD8	0.7	0.53-0.93	0.013
CPB1	0.04	0-2.98	0.146
CPE	0.88	0.74-1.05	0.155
CPEB1	0.84	0.65-1.08	0.172
CPLX1	0.74	0.51-1.08	0.121
CPT1B	0.71	0.5-1.02	0.061
CPT2	0.61	0.35-1.08	0.09
CR1L	0.62	0.31-1.24	0.179
CRB2	0.88	0.73-1.06	0.169
CRIPAK	0.58	0.39-0.88	0.009
CROT	0.82	0.6-1.11	0.195
CRTC1	0.77	0.55-1.07	0.119
CRY1	0.78	0.54-1.12	0.179
CRYGS	0.71	0.46-1.08	0.108
CSAD	0.76	0.6-0.98	0.036
CSMD3	1.7	1.21-2.4	0.002
CSPG5	0.76	0.52-1.12	0.163
CST3	1.29	0.93-1.78	0.122
CTB_55O6.8	0.74	0.56-0.96	0.026
CTBP2	1.44	0.84-2.47	0.185
CTC_479C5.12	0.61	0.38-0.99	0.046
CTD_2116N17.1	5.81	0.41-83.13	0.195
CTD_2192J16.20	0.49	0.23-1.06	0.071
CTD_2369P2.10	0.28	0.05-1.51	0.138
CTD_2583A14.9	0.01	0-1.26	0.061
CTR9	0.65	0.4-1.05	0.081
CUL4A	1.35	1.03-1.78	0.031
CUL9	0.76	0.61-0.94	0.011
CWC22	1.97	1.13-3.41	0.016
CXorf23	0.65	0.43-0.99	0.047
CXorf56	1.75	1.07-2.88	0.027
CXXC1	0.67	0.45-0.99	0.042
CYB5RL	0.74	0.54-1.02	0.07
CYP26C1	0.39	0.1-1.55	0.18
CYP27A1	0.88	0.76-1.02	0.09
CYP27C1	0.88	0.74-1.05	0.145
CYP2D6	0.55	0.31-0.96	0.035
CYP2E1	0.88	0.73-1.05	0.158
CYP4F12	0.86	0.72-1.01	0.07
CYSTM1	1.27	0.98-1.63	0.071
D4S234E	1.1	0.95-1.27	0.191
DAZAP1	0.59	0.31-1.12	0.107
DBNDD1	0.85	0.7-1.03	0.093
DBP	0.76	0.59-0.98	0.034
DCST1	0.51	0.26-0.98	0.044
DCST2	0.73	0.51-1.05	0.088
DDAH2	0.74	0.55-0.99	0.042
DDHD1	0.66	0.45-0.96	0.029
DDX11	0.85	0.68-1.06	0.15
DDX21	1.41	0.94-2.12	0.095
DDX25	0.46	0.23-0.92	0.028
DDX26B	0.76	0.58-0.99	0.043
DDX3Y	0.91	0.83-0.99	0.038
DDX43	0.81	0.6-1.09	0.169
DDX50	1.87	1.07-3.27	0.027
DEAF1	0.67	0.44-1.03	0.07
DESI1	1.62	0.99-2.64	0.054
DFFB	0.75	0.52-1.08	0.127
DFNA5	1.19	0.97-1.46	0.098
DGCR8	0.66	0.43-1.01	0.055
DGKH	1.39	0.97-1.99	0.073
DHRS11	0.69	0.47-1.02	0.061
DHRS2	1.2	1.02-1.42	0.032
DHRS3	0.87	0.72-1.06	0.177
DHTKD1	0.75	0.52-1.09	0.13
DHX57	0.69	0.4-1.19	0.179
DIAPH3	1.39	1.03-1.89	0.033
DKKL1	0.44	0.21-0.92	0.03
DLG3	0.81	0.6-1.1	0.18
DLX6	0.86	0.69-1.08	0.19
DMAP1	0.71	0.46-1.09	0.116
DMRTA2	0.82	0.7-0.96	0.015
DNAH1	0.78	0.6-1.02	0.066
DNAH14	1.25	1.01-1.55	0.041
DNAH7	0.71	0.46-1.1	0.123
DNAJB7	0.12	0.01-2.99	0.198
DNAJC27	0.7	0.46-1.09	0.114
DNHD1	0.78	0.6-1.01	0.064
DNMT1	0.73	0.55-0.95	0.021
DNMT3A	0.82	0.62-1.07	0.141
DONSON	0.81	0.6-1.11	0.195
DPP3	1.45	0.95-2.23	0.086
DPP7	1.35	0.93-1.96	0.112
DPY19L2	0.59	0.28-1.25	0.17
DPY19L3	0.65	0.45-0.94	0.02
DPYSL2	0.69	0.52-0.91	0.008
DRAP1	1.45	1.02-2.04	0.036
DSCAM	1.33	1.06-1.67	0.013
DSE	1.47	1.05-2.05	0.024
DSG2	1.19	0.93-1.51	0.163
DTNB	0.74	0.53-1.03	0.076
DUSP6	1.31	1.03-1.65	0.025
DUSP8	0.8	0.6-1.06	0.124
DYM	0.68	0.44-1.03	0.068
DYRK1B	0.87	0.7-1.07	0.181
E2F1	0.87	0.71-1.07	0.192
E2F2	0.83	0.67-1.04	0.112
E2F8	0.83	0.65-1.07	0.156
E4F1	0.69	0.43-1.12	0.136
EBLN2	0.26	0.1-0.69	0.007
ECD	1.63	0.87-3.06	0.127
ECE1	0.82	0.64-1.05	0.109
ECHDC2	0.82	0.66-1.01	0.061
EFHC2	0.67	0.48-0.93	0.016
EFHD1	0.74	0.53-1.02	0.066
EFHD2	1.22	0.92-1.63	0.173
EFNB2	1.72	1.3-2.29	0
EFR3B	0.85	0.67-1.07	0.167
EFS	0.67	0.49-0.91	0.01
EGFL8	0.45	0.22-0.95	0.036
EHD2	1.3	0.94-1.79	0.118
EHF	0.88	0.75-1.02	0.093
EIF2AK3	0.77	0.54-1.1	0.148
EIF4A1	0.78	0.55-1.09	0.147
ELF3	0.92	0.82-1.04	0.171
ELFN2	1.28	1.05-1.55	0.013
ELL3	0.55	0.31-0.97	0.039
EMC1	1.8	1.08-2.98	0.023
EME2	0.73	0.52-1.01	0.061
EML3	0.65	0.4-1.07	0.089
EN2	0.76	0.61-0.94	0.013
ENOSF1	0.79	0.59-1.07	0.126
ENPP6	0.82	0.63-1.06	0.129
EP400NL	0.77	0.54-1.1	0.146
EPB41L1	1.14	0.94-1.38	0.179
EPB41L4A	0.84	0.69-1.02	0.079
EPC1	0.65	0.43-1	0.051
EPHA10	0.8	0.6-1.06	0.124
EPHB6	0.77	0.65-0.91	0.002
EPHX2	0.8	0.67-0.97	0.025
EPHX3	0.86	0.77-0.95	0.004
EPX	0.31	0.08-1.21	0.092
ERCC6	1.38	0.86-2.23	0.18
ERICH6B	0.07	0.01-0.89	0.04
ERLIN1	1.38	0.85-2.23	0.191
ERV3_1	0.88	0.73-1.06	0.168
ESCO1	0.7	0.46-1.08	0.107
ESR1	0.85	0.72-1.02	0.077
ETV2	0.55	0.28-1.12	0.098
ETV6	0.76	0.56-1.01	0.061
EVA1C	0.81	0.66-1.01	0.06
EXOG	0.71	0.48-1.06	0.092
EXT2	1.53	1.08-2.17	0.016
EYA3	0.67	0.41-1.09	0.104
EZH1	0.62	0.44-0.88	0.007
EZH2	0.72	0.56-0.93	0.013
F2RL1	1.32	1.07-1.64	0.011
F3	1.23	1.07-1.42	0.005
FADS2	0.85	0.73-0.98	0.025
FADS3	1.14	0.95-1.38	0.158
FAM102A	0.79	0.58-1.06	0.115
FAM102B	0.79	0.62-1	0.05
FAM106A	0.14	0.01-1.54	0.108
FAM109B	0.58	0.42-0.8	0.001
FAM110C	1.17	0.95-1.44	0.131
FAM111A	1.45	1.02-2.06	0.037
FAM117A	0.82	0.63-1.07	0.136
FAM118A	0.7	0.48-1.02	0.06
FAM120AOS	1.35	0.86-2.13	0.192
FAM120C	0.8	0.62-1.03	0.084
FAM127C	0.65	0.5-0.85	0.002
FAM150B	0.64	0.36-1.11	0.111
FAM153C	0.2	0.03-1.28	0.09
FAM161B	0.67	0.43-1.04	0.077
FAM163A	0.45	0.18-1.12	0.085
FAM171A1	0.87	0.74-1.02	0.076
FAM172A	0.73	0.54-1.01	0.055
FAM173A	0.76	0.54-1.08	0.123
FAM182B	0.73	0.5-1.09	0.123
FAM184A	0.78	0.57-1.06	0.112
FAM189A2	0.84	0.68-1.03	0.09
FAM193B	0.67	0.48-0.94	0.02
FAM210B	0.65	0.47-0.9	0.01
FAM212B	0.72	0.55-0.95	0.021
FAM217B	0.73	0.5-1.08	0.112
FAM221A	0.83	0.63-1.1	0.19
FAM222A	0.76	0.61-0.96	0.02
FAM227A	0.68	0.43-1.08	0.101
FAM229A	0.62	0.38-1.01	0.056
FAM3B	0.9	0.8-1.01	0.076
FAM53A	0.66	0.39-1.14	0.135
FAM65C	0.7	0.54-0.89	0.004
FAM71F2	0.58	0.31-1.06	0.075
FAM73B	0.72	0.5-1.02	0.067
FAM81A	0.77	0.59-1	0.048
FAM83A	1.1	0.96-1.27	0.166
FAM83E	0.91	0.79-1.04	0.168
FAM84A	0.87	0.76-0.98	0.025
FAM86B2	0.19	0.02-2.36	0.197
FAM98C	0.64	0.41-1.01	0.053
FANCF	1.28	0.89-1.84	0.18
FAT3	0.78	0.56-1.07	0.126
FAXC	0.85	0.7-1.03	0.091
FBN3	0.72	0.49-1.07	0.106
FBXL16	0.86	0.7-1.04	0.124
FBXO25	0.62	0.43-0.88	0.008
FBXO27	0.83	0.64-1.08	0.171
FBXO34	0.65	0.42-1.01	0.053
FBXO41	0.73	0.57-0.94	0.014
FBXO43	0.73	0.5-1.07	0.104
FBXO7	1.73	0.88-3.41	0.114
FBXW5	0.76	0.53-1.09	0.14
FEZ1	1.19	1-1.41	0.05
FGD1	0.82	0.61-1.1	0.187
FGF17	0.4	0.12-1.32	0.133
FGF2	0.88	0.73-1.05	0.149
FGFR2	0.81	0.65-0.99	0.04
FGGY	1.34	0.87-2.07	0.19
FHIT	0.61	0.4-0.96	0.03
FHL2	1.31	1.02-1.69	0.036
FJX1	1.2	0.94-1.53	0.153
FKBP6	0.21	0.04-1.14	0.07
FKBP9	1.31	0.94-1.83	0.115
FKSG48	0.69	0.47-1.02	0.061
FKTN	1.4	0.88-2.25	0.156
FMNL2	1.38	0.98-1.94	0.067
FNBP1L	0.79	0.59-1.07	0.129
FO538757.2	0.64	0.39-1.04	0.072
FOSL1	1.28	1.07-1.52	0.006
FOXA1	0.93	0.82-1.04	0.191
FOXD4	0.52	0.21-1.26	0.146
FOXD4L1	0.14	0.01-1.25	0.078
FOXP2	0.83	0.72-0.97	0.017
FOXRED2	0.81	0.66-0.98	0.032
FRAS1	0.85	0.72-1	0.056
FRAT1	0.55	0.38-0.79	0.001
FRAT2	0.71	0.53-0.94	0.016
FRMD4A	0.61	0.47-0.81	0.001
FSCN1	1.35	0.99-1.82	0.054
FSCN3	4.79	0.57-40.21	0.149
FST	1.24	1.05-1.45	0.009
FSTL3	1.22	1.03-1.45	0.024
FUBP1	1.6	0.91-2.79	0.1
FUK	0.72	0.44-1.15	0.168
FUZ	0.83	0.67-1.04	0.103
FXYD5	1.28	1.03-1.59	0.023
FZD9	0.63	0.4-0.99	0.043
GABRB2	0.73	0.45-1.16	0.182
GABRE	0.89	0.75-1.05	0.164
GABRR1	1.27	0.99-1.64	0.059
GAD1	0.85	0.67-1.08	0.187
GALNS	1.32	0.96-1.82	0.088
GALNT11	0.82	0.61-1.1	0.182
GANAB	1.35	0.86-2.13	0.194
GAR1	1.58	0.96-2.59	0.074
GAREM	0.72	0.56-0.93	0.013
GAS6	1.18	0.93-1.49	0.181
GATM	0.86	0.74-1	0.049
GCHFR	0.84	0.64-1.1	0.199
GCK	0.45	0.25-0.8	0.007
GCNT7	0.19	0.02-2.29	0.193
GCSAM	0.78	0.6-1.01	0.064
GDA	0.91	0.79-1.04	0.161
GDAP1	0.83	0.65-1.07	0.153
GDF9	0.48	0.17-1.4	0.18
GDPGP1	0.72	0.49-1.06	0.1
GFI1B	0.12	0.02-0.92	0.041
GGA1	0.58	0.33-1.02	0.06
GGA2	0.81	0.62-1.07	0.138
GGACT	0.72	0.5-1.06	0.094
GIPR	0.54	0.35-0.83	0.005
GLB1L	1.18	0.92-1.52	0.194
GLS2	0.76	0.57-1.02	0.067
GMEB1	0.63	0.36-1.08	0.093
GNAI3	1.72	0.91-3.27	0.095
GNAL	0.82	0.69-0.98	0.027
GNE	0.76	0.61-0.95	0.017
GNMT	0.44	0.15-1.29	0.135
GNRH1	0.46	0.26-0.82	0.009
GOLGA8A	0.88	0.75-1.05	0.151
GOLGA8N	0.38	0.15-0.94	0.037
GOLGA8R	0.24	0.04-1.54	0.132
GORAB	0.8	0.57-1.11	0.187
GPALPP1	1.46	0.93-2.27	0.098
GPBP1L1	0.62	0.32-1.18	0.147
GPC2	0.67	0.51-0.88	0.005
GPD2	1.26	0.92-1.73	0.144
GPHA2	0.18	0.02-1.34	0.095
GPLD1	0.74	0.52-1.06	0.098
GPR113	0.49	0.25-0.97	0.039
GPR135	1.45	0.83-2.54	0.196
GPR137C	0.6	0.41-0.87	0.007
GPR143	0.83	0.67-1.03	0.092
GPR144	0.52	0.34-0.81	0.003
GPR150	0.41	0.19-0.87	0.02
GPR158	1.18	1-1.4	0.055
GPR39	1.16	0.93-1.45	0.176
GPR56	1.29	0.91-1.83	0.155
GPR61	0.22	0.03-1.82	0.159
GPR62	0.3	0.1-0.92	0.036
GPR64	0.59	0.38-0.93	0.024
GPR75	0.69	0.4-1.17	0.168
GPS2	0.56	0.36-0.88	0.011
GRAMD1C	0.83	0.66-1.06	0.137
GRAMD3	0.64	0.46-0.9	0.009
GRID2IP	0.64	0.33-1.26	0.197
GRIK1	3.99	1.25-12.69	0.019
GRIN2A	0.87	0.75-1.02	0.079
GRIN2C	0.73	0.55-0.97	0.027
GRM2	0.54	0.26-1.11	0.096
GRM8	0.49	0.24-1	0.051
GRN	1.45	0.95-2.21	0.085
GSTM3	0.9	0.78-1.03	0.134
GTF2IRD1	0.62	0.43-0.9	0.011
GTF2IRD2	0.69	0.4-1.18	0.173
GTF3C2	0.66	0.35-1.24	0.195
GTPBP6	0.64	0.43-0.96	0.031
GYLTL1B	1.15	0.95-1.39	0.161
GYS1	1.52	0.9-2.56	0.118
H3F3A	0.7	0.43-1.15	0.162
HACE1	0.61	0.38-0.98	0.043
HAGH	0.72	0.45-1.15	0.169
HAUS5	0.81	0.6-1.1	0.184
HBEGF	1.15	0.94-1.39	0.172
HBP1	0.77	0.52-1.14	0.191
HCG27	0.52	0.27-1.02	0.057
HCN3	0.62	0.44-0.87	0.006
HCN4	0.18	0.03-1	0.049
HDAC11	0.74	0.52-1.07	0.109
HDAC5	0.67	0.45-0.99	0.045
HDAC6	0.75	0.52-1.08	0.126
HEATR4	0.67	0.39-1.12	0.128
HENMT1	0.79	0.63-1	0.046
HES6	0.82	0.65-1.02	0.08
HEXIM2	0.59	0.33-1.07	0.083
HFE	1.35	0.97-1.87	0.071
HID1	0.87	0.71-1.07	0.182
HK2	1.22	0.97-1.55	0.091
HLCS	0.76	0.57-1.03	0.075
HLF	0.83	0.72-0.96	0.013
HMGN1	1.34	0.94-1.92	0.105
HMSD	0.81	0.62-1.05	0.105
HNRNPH1	0.73	0.49-1.09	0.127
HNRNPK	2.2	0.95-5.07	0.064
HNRNPM	0.71	0.45-1.11	0.136
HOMER1	1.4	0.97-2.01	0.069
HOXA1	1.73	1.18-2.52	0.005
HOXA13	1.21	0.93-1.57	0.156
HP1BP3	0.74	0.48-1.13	0.157
HPCA	0.46	0.19-1.09	0.077
HPDL	0.84	0.69-1.03	0.092
HPGD	0.89	0.76-1.04	0.147
HPN	1.25	0.97-1.61	0.08
HRASLS2	1.24	0.98-1.59	0.079
HRASLS5	1.44	0.95-2.18	0.085
HRH1	1.35	0.95-1.91	0.097
HS3ST1	1.3	1.02-1.64	0.032
HS3ST4	0.81	0.63-1.06	0.121
HSD11B1L	0.71	0.53-0.95	0.023
HSD17B6	0.68	0.44-1.05	0.078
HSP90B1	2	1.25-3.19	0.004
HSPA12A	1.13	0.94-1.37	0.195
HSPA5	1.8	1.19-2.73	0.006
HSPA8	1.32	0.92-1.9	0.133
HSPH1	1.32	0.98-1.78	0.065
HTR7	1.14	0.98-1.34	0.097
HUNK	0.78	0.64-0.96	0.021
HYI	0.75	0.48-1.16	0.197
HYPK	0.67	0.38-1.2	0.181
ICK	0.76	0.57-1	0.053
IDH1	1.42	0.98-2.06	0.061
IDNK	1.44	0.93-2.23	0.098
IER2	0.7	0.5-0.99	0.041
IGFBP6	1.12	1-1.24	0.047
IGFBPL1	0.64	0.38-1.08	0.097
IGIP	0.69	0.45-1.05	0.085
IGSF11	1.14	0.97-1.35	0.119
IGSF22	0.69	0.44-1.1	0.124
IGSF9	0.79	0.66-0.95	0.013
IKBKE	0.76	0.56-1.02	0.07
IKZF2	0.85	0.69-1.03	0.103
IL17RB	0.75	0.58-0.96	0.024
IL17REL	0.82	0.67-0.99	0.043
IL18	1.19	0.97-1.46	0.102
IL1A	1.13	0.99-1.29	0.071
IL1RAP	1.47	1.1-1.96	0.01
IL20RB	1.15	0.97-1.36	0.117
IL23A	0.72	0.53-0.97	0.032
IL31RA	1.44	1.15-1.82	0.002
IL34	0.87	0.71-1.05	0.151
ILF3	0.61	0.39-0.94	0.026
IMPG1	0.12	0.03-0.52	0.005
INA	0.78	0.63-0.98	0.03
INF2	1.67	1.11-2.5	0.013
ING4	0.7	0.51-0.96	0.029
INHBA	1.17	1.02-1.36	0.03
INPP4B	1.15	0.93-1.41	0.197
INPP5B	0.7	0.45-1.08	0.109
INPP5F	0.79	0.59-1.06	0.115
INPP5J	0.77	0.6-0.98	0.037
INSIG2	1.48	0.96-2.27	0.074
INSM1	0.61	0.38-0.97	0.035
INSRR	0.52	0.24-1.12	0.096
IQCD	0.64	0.37-1.09	0.099
IRAK3	0.89	0.75-1.06	0.183
IRF9	0.77	0.57-1.04	0.086
IRS1	1.19	0.97-1.47	0.101
IRX5	0.69	0.51-0.95	0.023
IRX6	0.79	0.65-0.96	0.02
ITFG2	0.76	0.55-1.07	0.115
ITGA2B	0.65	0.42-0.99	0.044
ITGA3	1.32	1.05-1.66	0.016
ITGA5	1.44	1.15-1.8	0.001
ITGA6	1.28	1.04-1.59	0.023
ITGB4	1.21	0.91-1.61	0.182
ITPRIPL1	0.78	0.62-0.99	0.038
IWS1	1.56	0.8-3.05	0.192
IZUMO1	0.36	0.15-0.86	0.022
JADE1	0.78	0.58-1.03	0.083
JAG1	1.23	0.9-1.68	0.194
JMJD7_PLA2G4B	0.67	0.51-0.87	0.003
JMJD8	0.64	0.35-1.16	0.138
JUND	0.79	0.58-1.07	0.133
KANSL3	0.73	0.49-1.08	0.114
KATNAL2	0.73	0.55-0.98	0.033
KAZALD1	0.68	0.51-0.91	0.009
KCNA2	0.74	0.54-1.01	0.059
KCNAB3	0.6	0.37-0.96	0.034
KCNC3	0.74	0.58-0.96	0.021
KCNG3	0.67	0.43-1.04	0.071
KCNIP2	0.44	0.23-0.86	0.015
KCNJ15	1.32	1.07-1.62	0.009
KCNS1	0.88	0.77-1.01	0.065
KCTD7	0.78	0.55-1.1	0.158
KEL	0.8	0.65-0.99	0.044
KHSRP	0.63	0.39-1	0.051
KIAA1211	0.73	0.53-1	0.05
KIAA1279	1.6	0.97-2.65	0.066
KIAA1324L	1.17	0.94-1.46	0.154
KIAA1328	0.72	0.5-1.03	0.073
KIAA1377	1.22	0.99-1.5	0.067
KIAA1522	0.82	0.6-1.11	0.197
KIAA1683	0.72	0.54-0.94	0.018
KIAA1841	0.8	0.57-1.12	0.192
KIAA1875	0.68	0.49-0.96	0.026
KIAA1958	0.77	0.57-1.05	0.097
KIAA2022	0.78	0.6-1.02	0.067
KIF24	0.85	0.67-1.06	0.148
KIF25	0.61	0.33-1.11	0.106
KIF27	0.76	0.54-1.07	0.116
KIF4A	1.23	0.91-1.67	0.174
KIT	0.79	0.65-0.96	0.018
KL	0.64	0.45-0.9	0.011
KLB	0.63	0.36-1.11	0.11
KLF1	0.15	0.01-1.68	0.125
KLF10	1.39	1.03-1.88	0.034
KLF7	1.43	1.04-1.97	0.027
KLHDC1	0.64	0.39-1.06	0.081
KLHDC2	0.66	0.41-1.05	0.077
KLHL17	0.75	0.52-1.09	0.137
KLHL24	0.84	0.67-1.05	0.127
KLHL25	0.73	0.5-1.06	0.098
KLHL35	0.77	0.62-0.95	0.014
KLRG2	0.79	0.65-0.95	0.014
KPNA3	1.67	0.98-2.85	0.058
KRBA2	0.5	0.19-1.26	0.14
KRT8	1.07	0.97-1.18	0.192
KSR1	0.8	0.63-1	0.054
KSR2	0.64	0.44-0.93	0.019
L2HGDH	0.79	0.58-1.08	0.14
L3MBTL1	0.73	0.55-0.96	0.025
LAMA3	1.16	0.97-1.38	0.108
LAMB3	1.35	1.08-1.7	0.01
LAMC2	1.2	1.02-1.42	0.025
LAMP1	1.31	1.03-1.68	0.027
LANCL3	0.72	0.53-0.98	0.038
LARGE	0.72	0.59-0.89	0.002
LARP1B	0.76	0.52-1.11	0.152
LASP1	1.91	1.08-3.39	0.026
LAT	0.5	0.24-1.04	0.063
LCNL1	0.14	0.02-0.84	0.032
LCORL	0.67	0.41-1.07	0.095
LDHA	1.29	0.92-1.81	0.135
LDHC	0.52	0.33-0.81	0.004
LDHD	0.83	0.66-1.03	0.097
LEAP2	0.5	0.26-0.94	0.031
LENG8	0.72	0.53-0.98	0.036
LFNG	1.17	0.93-1.48	0.172
LGR4	0.82	0.62-1.08	0.164
LGR5	0.82	0.68-0.99	0.035
LHFPL4	0.8	0.58-1.09	0.157
LHX4	0.46	0.23-0.89	0.022
LIG1	0.82	0.64-1.05	0.115
LIMA1	1.37	0.95-1.99	0.093
LIME1	0.67	0.42-1.07	0.094
LIN37	0.56	0.3-1.05	0.071
LIN7B	0.62	0.4-0.96	0.032
LINGO2	1.56	1.09-2.23	0.016
LIPE	0.75	0.61-0.92	0.005
LIPT2	0.66	0.4-1.06	0.087
LMF1	0.75	0.57-1	0.047
LMO4	0.77	0.61-0.96	0.019
LMX1B	1.35	1.13-1.63	0.001
LNX1	0.85	0.68-1.07	0.171
LONRF1	0.75	0.57-0.98	0.038
LPPR2	0.68	0.5-0.94	0.019
LRIT3	0.19	0.03-1.29	0.089
LRRC16B	0.61	0.45-0.83	0.002
LRRC34	0.68	0.41-1.1	0.115
LRRC37A2	0.63	0.42-0.97	0.035
LRRC48	0.66	0.44-0.99	0.042
LRRC4B	0.55	0.35-0.85	0.007
LRRC56	0.69	0.52-0.92	0.011
LRRC6	0.69	0.48-1.01	0.056
LRRC75A	0.7	0.46-1.07	0.098
LRRC8C	1.45	1.04-2.01	0.029
LRRC8D	1.32	0.95-1.85	0.102
LRRC9	2.55	1.26-5.13	0.009
LRRFIP1	1.48	0.88-2.48	0.139
LSAMP	0.87	0.73-1.04	0.125
LTBP4	0.76	0.58-0.98	0.037
LUC7L3	0.76	0.53-1.09	0.14
LY6G5B	0.56	0.35-0.9	0.017
LYPD6	0.87	0.72-1.04	0.129
LZTFL1	0.72	0.51-1.03	0.072
M1AP	0.86	0.7-1.05	0.142
MAATS1	0.8	0.59-1.07	0.137
MACC1	0.87	0.73-1.04	0.131
MAGI1	0.66	0.5-0.88	0.004
MAGIX	0.56	0.37-0.84	0.006
MAGT1	1.66	1.05-2.62	0.029
MAK	0.7	0.41-1.19	0.186
MAMDC4	0.83	0.68-1.03	0.09
MAML3	0.82	0.65-1.04	0.108
MAMSTR	0.75	0.54-1.03	0.077
MANEAL	0.84	0.68-1.03	0.087
MANSC1	0.82	0.69-0.97	0.019
MAP1LC3A	0.84	0.69-1.02	0.085
MAP3K14	0.83	0.67-1.04	0.113
MAP3K5	0.76	0.55-1.06	0.107
MAP3K6	0.63	0.45-0.88	0.006
MAP3K8	0.7	0.52-0.94	0.019
MAP4K4	1.34	0.91-1.97	0.135
MAP7D2	0.86	0.75-0.99	0.031
MAP7D3	1.65	1.13-2.4	0.01
MAPK15	0.83	0.63-1.08	0.158
MASP2	0.47	0.24-0.93	0.031
MAST1	0.79	0.6-1.05	0.109
MAT2A	0.77	0.54-1.1	0.149
MBD1	0.65	0.42-1	0.05
MBOAT2	1.17	0.95-1.43	0.135
MCMDC2	0.74	0.52-1.05	0.095
MCU	1.46	0.94-2.26	0.095
MCUR1	0.67	0.44-1.02	0.064
MDFI	1.2	0.94-1.52	0.141
MDM1	0.83	0.64-1.08	0.171
MEGF10	0.81	0.69-0.95	0.01
MEIG1	0.34	0.11-1.05	0.061
MEIS1	0.71	0.55-0.9	0.006
MESP2	0.78	0.54-1.12	0.182
MET	1.4	1.11-1.77	0.005
METTL20	0.68	0.41-1.14	0.14
MEX3A	0.85	0.68-1.06	0.154
MFSD6	0.77	0.6-1	0.051
MGAT3	0.86	0.75-0.99	0.04
MGEA5	0.73	0.47-1.15	0.175
MICU1	1.7	0.89-3.25	0.106
MINPP1	1.39	0.93-2.07	0.11
MKRN2OS	0.71	0.46-1.11	0.13
MLNR	5.09	0.48-53.47	0.175
MMGT1	2.13	1.25-3.61	0.005
MMP13	1.05	0.97-1.14	0.199
MOB1A	1.52	0.81-2.85	0.193
MOBP	2.25	0.72-7.01	0.162
MOXD1	0.84	0.74-0.97	0.013
MPHOSPH8	0.59	0.35-0.98	0.04
MPND	0.53	0.33-0.83	0.006
MR1	1.41	1.04-1.92	0.026
MROH7	0.66	0.42-1.04	0.075
MRPL38	0.7	0.43-1.16	0.169
MRPS25	0.71	0.47-1.07	0.104
MSH5	0.71	0.46-1.09	0.116
MSH5_SAPCD1	0.39	0.12-1.29	0.124
MSN	1.37	0.96-1.95	0.081
MSRA	0.81	0.59-1.11	0.194
MSRB1	1.25	0.95-1.64	0.11
MSRB2	1.5	0.99-2.29	0.059
MSS51	0.59	0.32-1.11	0.102
MST1	0.76	0.53-1.09	0.14
MT1E	1.25	1.08-1.45	0.004
MT1X	1.32	1.09-1.6	0.004
MT2A	1.29	1.1-1.51	0.002
MTG1	0.64	0.4-1.02	0.061
MTMR10	0.7	0.46-1.06	0.093
MTMR7	0.68	0.42-1.09	0.109
MTO1	0.66	0.39-1.12	0.121
MTRNR2L4	0.01	0-3.75	0.121
MTSS1	1.33	0.99-1.78	0.06
MTUS1	0.81	0.62-1.06	0.132
MUL1	1.57	0.91-2.7	0.106
MXD3	0.84	0.65-1.09	0.196
MYB	0.86	0.72-1.02	0.085
MYC	1.2	0.94-1.54	0.147
MYCN	0.7	0.54-0.92	0.009
MYH10	1.16	0.93-1.43	0.187
MYLIP	0.86	0.7-1.06	0.159
MYO1B	1.32	1.03-1.69	0.03
MYO3A	0.89	0.77-1.01	0.076
MYO3B	0.84	0.69-1.01	0.069
MYO6	0.72	0.56-0.94	0.017
MYOF	1.6	1.09-2.35	0.017
MYRIP	0.69	0.41-1.15	0.156
MYSM1	0.68	0.47-0.98	0.04
N4BP3	0.71	0.54-0.93	0.015
NAA16	0.66	0.41-1.05	0.082
NABP1	1.33	0.99-1.8	0.061
NAGPA	0.7	0.45-1.09	0.114
NAGS	1.34	0.99-1.81	0.059
NAMPT	1.19	0.93-1.5	0.161
NARFL	0.66	0.4-1.08	0.098
NAT10	1.83	1.18-2.84	0.007
NAT6	0.69	0.42-1.14	0.146
NAV2	0.71	0.58-0.88	0.002
NBPF11	0.74	0.5-1.08	0.117
NBPF12	0.75	0.52-1.07	0.111
NBPF14	0.71	0.48-1.04	0.078
NBPF15	0.77	0.54-1.08	0.129
NBPF19	0.73	0.49-1.09	0.124
NCALD	0.79	0.65-0.96	0.019
NCK2	0.72	0.45-1.17	0.184
NCL	1.58	1.02-2.46	0.042
NCOA5	0.65	0.42-1.02	0.063
NCSTN	1.56	0.87-2.79	0.137
NDST3	0.2	0.03-1.31	0.093
NDUFAF3	0.63	0.36-1.11	0.112
NEDD4	1.31	0.9-1.91	0.158
NEFH	0.79	0.64-0.96	0.018
NFASC	1.31	1.05-1.64	0.016
NFIL3	1.36	0.96-1.93	0.08
NIPA1	0.64	0.44-0.93	0.02
NKAP	1.83	1.02-3.3	0.044
NKTR	0.62	0.44-0.86	0.004
NLRP1	0.77	0.6-0.98	0.034
NMT2	0.7	0.47-1.04	0.074
NOC3L	1.34	0.87-2.06	0.18
NOS2	0.84	0.71-1.01	0.059
NOVA1	0.79	0.59-1.06	0.119
NOXRED1	0.39	0.12-1.25	0.112
NPEPL1	0.73	0.51-1.04	0.084
NPIPA5	0.65	0.34-1.23	0.187
NPIPB15	0.77	0.52-1.14	0.185
NPIPB3	0.49	0.23-1.06	0.069
NPIPB4	0.65	0.41-1.05	0.078
NPM2	0.82	0.63-1.06	0.124
NPR3	0.87	0.74-1.01	0.068
NR1D2	0.75	0.58-0.97	0.031
NR1I3	0.6	0.32-1.15	0.124
NR2C1	0.62	0.39-1	0.052
NR2F1	0.85	0.68-1.07	0.178
NR3C2	0.86	0.71-1.04	0.116
NRCAM	0.85	0.73-0.99	0.033
NRG1	1.16	1-1.34	0.046
NRIP1	1.28	0.93-1.74	0.128
NRIP2	0.69	0.48-1	0.05
NRL	0.48	0.25-0.95	0.035
NRTN	0.62	0.43-0.89	0.01
NSMCE4A	0.73	0.5-1.07	0.109
NT5E	1.2	1.04-1.38	0.013
NTN3	0.4	0.17-0.97	0.043
NUDT8	0.8	0.61-1.03	0.084
NYNRIN	0.79	0.67-0.93	0.005
OAT	0.77	0.54-1.11	0.166
OCA2	0.84	0.69-1.03	0.098
OFD1	0.71	0.48-1.04	0.077
OGFRL1	0.81	0.64-1.02	0.077
OGT	0.78	0.56-1.09	0.145
ONECUT2	0.78	0.6-1.02	0.072
ORAI1	0.66	0.42-1.04	0.072
ORAI2	0.83	0.66-1.02	0.082
OSR1	0.81	0.6-1.09	0.157
OSTM1	1.48	0.97-2.26	0.066
OTUD3	0.71	0.5-1	0.048
OTUD7A	0.78	0.6-1.01	0.06
OXER1	0.8	0.58-1.1	0.175
OXR1	0.73	0.53-1	0.048
P2RX5_TAX1BP3	0.45	0.18-1.13	0.09
P2RY4	0.16	0.01-2.37	0.182
P3H2	1.1	0.96-1.26	0.161
P4HA2	1.6	1.13-2.25	0.007
PAFAH1B3	0.8	0.61-1.06	0.118
PAGR1	0.62	0.38-1	0.049
PAK3	0.75	0.58-0.98	0.034
PANK1	0.75	0.56-1.02	0.067
PAOX	0.52	0.33-0.82	0.005
PAPLN	0.88	0.73-1.06	0.179
PARD3	0.81	0.62-1.05	0.11
PARD3B	0.82	0.68-0.99	0.04
PARD6A	0.78	0.55-1.1	0.16
PARD6G	0.72	0.53-0.98	0.036
PARM1	0.91	0.79-1.04	0.154
PARN	2.45	1.26-4.76	0.008
PASK	0.82	0.63-1.06	0.13
PAX8	0.84	0.69-1.03	0.091
PAX9	0.86	0.74-1	0.055
PAXBP1	0.78	0.55-1.1	0.159
PBDC1	1.68	1-2.84	0.052
PBX1	0.86	0.75-0.97	0.017
PBX4	0.72	0.51-1.02	0.063
PCBD2	0.79	0.56-1.12	0.18
PCDHGA10	1.21	1.02-1.44	0.026
PCDHGA4	1.32	1-1.73	0.047
PCDHGB1	1.21	0.99-1.49	0.067
PCDHGB2	1.28	1.05-1.56	0.016
PCDHGC3	1.21	0.96-1.51	0.101
PCED1A	0.78	0.57-1.06	0.109
PCGF2	1.42	0.98-2.05	0.065
PCMTD1	0.78	0.53-1.13	0.192
PCMTD2	0.79	0.56-1.11	0.18
PCNT	0.81	0.6-1.1	0.174
PCP2	0.44	0.22-0.89	0.023
PCP4L1	0.87	0.74-1.02	0.079
PDDC1	0.72	0.51-1.03	0.071
PDE5A	0.78	0.62-0.99	0.045
PDE6B	0.85	0.67-1.08	0.176
PDE6C	0.19	0.03-1.33	0.094
PDE8B	0.78	0.55-1.11	0.171
PDPN	1.16	0.96-1.39	0.123
PDXK	0.65	0.43-0.98	0.04
PDXP	0.64	0.36-1.14	0.131
PDZD2	0.84	0.69-1.02	0.086
PECR	1.27	0.89-1.82	0.189
PELI1	0.8	0.59-1.07	0.131
PELI3	0.66	0.42-1.04	0.072
PER3	0.83	0.68-1.01	0.063
PEX11G	0.65	0.39-1.07	0.093
PEX12	1.39	0.88-2.2	0.153
PEX13	1.61	0.96-2.68	0.07
PFKFB1	0.46	0.15-1.44	0.183
PGAM1	1.4	0.93-2.12	0.11
PGAP1	0.84	0.66-1.08	0.169
PGRMC1	1.74	1.09-2.76	0.019
PHC1	0.68	0.49-0.94	0.02
PHF8	0.79	0.59-1.08	0.138
PHKA2	0.67	0.48-0.95	0.026
PHLDA1	1.18	0.94-1.48	0.15
PHLDB2	1.32	1.07-1.65	0.011
PHYHD1	0.91	0.79-1.04	0.176
PIAS3	0.64	0.42-0.98	0.041
PIDD1	0.78	0.58-1.03	0.082
PIGA	0.73	0.48-1.11	0.147
PIGN	0.74	0.54-1	0.053
PIGP	1.44	0.98-2.12	0.066
PIK3C3	0.76	0.51-1.12	0.166
PIK3R3	0.76	0.62-0.93	0.008
PIP5K1A	1.82	0.97-3.42	0.063
PITPNB	2.08	1.14-3.78	0.016
PITX1	0.76	0.62-0.94	0.01
PITX2	1.11	0.95-1.3	0.172
PIWIL4	0.65	0.46-0.93	0.019
PJA1	1.79	1.12-2.86	0.015
PKIB	1.34	1.03-1.74	0.027
PKM	1.82	1.16-2.85	0.009
PKN3	0.82	0.61-1.09	0.163
PLA2G4A	0.87	0.73-1.03	0.106
PLA2G4B	0.54	0.32-0.91	0.021
PLA2G4C	0.83	0.66-1.03	0.086
PLA2G6	0.76	0.56-1.04	0.082
PLAU	1.33	1.08-1.64	0.006
PLEK2	1.14	0.93-1.4	0.196
PLEKHA8	0.65	0.39-1.08	0.099
PLEKHD1	0.27	0.1-0.7	0.007
PLEKHG1	0.75	0.61-0.93	0.007
PLEKHG6	0.86	0.74-0.99	0.036
PLEKHH1	0.7	0.53-0.92	0.01
PLEKHH3	0.61	0.41-0.91	0.015
PLGLB1	0.08	0.01-1.27	0.074
PLXNB1	0.74	0.55-0.98	0.034
PNMA3	0.68	0.46-1	0.051
PNMAL2	0.74	0.54-1.02	0.068
PNPLA2	0.77	0.51-1.15	0.196
POC1B_GALNT4	0.21	0.03-1.35	0.099
POLD1	0.78	0.57-1.05	0.096
POLE	0.79	0.59-1.06	0.117
POLE2	0.82	0.61-1.1	0.181
POLL	0.58	0.33-1	0.051
POLR2L	1.3	0.87-1.95	0.197
POLR2M	1.42	0.91-2.22	0.122
POU4F1	0.71	0.51-0.97	0.031
PP2D1	0.16	0.03-0.82	0.028
PPAP2B	0.81	0.67-0.97	0.024
PPARG	1.24	1-1.54	0.049
PPFIBP2	0.75	0.61-0.92	0.005
PPIB	1.94	1.23-3.07	0.004
PPIC	1.66	1.04-2.64	0.034
PPIG	1.41	0.86-2.32	0.175
PPIL2	0.66	0.42-1.05	0.083
PPIP5K1	0.73	0.5-1.07	0.108
PPM1A	0.68	0.39-1.17	0.165
PPM1D	0.57	0.36-0.89	0.014
PPM1H	0.84	0.69-1.03	0.1
PPM1L	0.82	0.68-0.98	0.027
PPM1N	0.69	0.48-1	0.048
PPOX	0.74	0.49-1.11	0.143
PPP1R12B	0.82	0.66-1.01	0.057
PPP1R14C	1.42	1.05-1.92	0.023
PPP1R3D	0.77	0.52-1.13	0.177
PPP1R3E	0.68	0.5-0.93	0.014
PPP2R3B	0.76	0.57-1.01	0.057
PPP3R1	1.59	0.82-3.08	0.166
PPP6R3	1.53	0.97-2.4	0.069
PPT2_EGFL8	0.42	0.17-1	0.051
PPTC7	1.31	0.89-1.94	0.17
PRCD	0.64	0.35-1.17	0.147
PRDM15	0.65	0.48-0.89	0.007
PRDX2	0.79	0.63-0.98	0.034
PRELID2	1.35	0.97-1.88	0.073
PRKRA	1.43	0.92-2.22	0.113
PRKX	0.78	0.62-0.98	0.031
PRNP	1.31	0.98-1.75	0.067
PROCA1	0.57	0.34-0.98	0.041
PROCR	1.21	0.99-1.47	0.069
PROX1	0.86	0.69-1.08	0.195
PRPF39	0.72	0.5-1.04	0.084
PRPF40A	1.64	0.87-3.09	0.128
PRPF40B	0.77	0.52-1.13	0.183
PRPS2	0.76	0.56-1.04	0.09
PRPSAP1	0.64	0.4-1.01	0.056
PRR19	0.74	0.51-1.08	0.116
PRR29	0.64	0.38-1.09	0.101
PRR36	0.7	0.49-1	0.051
PRRG1	1.22	0.93-1.6	0.151
PRRT2	0.49	0.28-0.89	0.018
PRRT3	0.51	0.32-0.81	0.004
PRSS12	0.79	0.7-0.9	0
PRSS36	0.63	0.45-0.89	0.01
PRSS42	0.02	0-6.17	0.181
PRSS45	0.41	0.15-1.13	0.086
PSD3	0.79	0.65-0.96	0.016
PSMD1	2.18	1.07-4.46	0.032
PSPC1	0.73	0.5-1.05	0.093
PSTK	0.67	0.43-1.04	0.077
PTBP2	0.76	0.55-1.05	0.1
PTCH2	0.54	0.31-0.94	0.028
PTER	0.72	0.49-1.07	0.108
PTGFRN	1.31	0.9-1.91	0.165
PTH2R	1.22	1.03-1.45	0.021
PTHLH	1.11	0.98-1.25	0.095
PTN	0.91	0.81-1.02	0.108
PTP4A1	1.4	0.98-2	0.068
PTPDC1	1.44	0.94-2.2	0.092
PTPRS	0.85	0.72-1.01	0.066
PTRF	1.27	0.93-1.75	0.136
PVR	1.23	0.93-1.64	0.152
PVRIG	0.19	0.02-1.6	0.128
PXDC1	1.46	1.03-2.08	0.035
PXN	1.53	1.14-2.06	0.005
PXYLP1	0.82	0.68-0.98	0.032
PYDC1	0.71	0.48-1.04	0.077
PYGL	1.23	1.01-1.48	0.035
PYROXD1	0.56	0.35-0.9	0.016
QDPR	0.77	0.54-1.09	0.135
QRICH2	0.76	0.56-1.02	0.068
QSER1	0.76	0.51-1.12	0.168
RAB11FIP5	1.33	0.87-2.04	0.182
RAB31	1.25	0.9-1.73	0.184
RAB36	0.83	0.66-1.04	0.1
RAB3A	0.67	0.42-1.08	0.102
RAB42	0.86	0.7-1.06	0.17
RAB9A	0.56	0.34-0.93	0.026
RAD9B	0.75	0.53-1.05	0.092
RAI2	0.82	0.65-1.04	0.103
RALB	1.83	1.26-2.67	0.002
RALGPS1	0.82	0.66-1.02	0.075
RANBP17	0.78	0.63-0.96	0.02
RANBP9	0.7	0.43-1.15	0.163
RASA2	0.72	0.47-1.1	0.125
RASIP1	0.89	0.75-1.05	0.173
RASSF10	0.86	0.7-1.06	0.159
RASSF9	0.88	0.75-1.03	0.107
RB1CC1	0.7	0.45-1.1	0.126
RBBP9	0.64	0.45-0.91	0.013
RBM10	0.6	0.33-1.09	0.093
RBM14	0.59	0.35-1.01	0.053
RBM38	0.79	0.6-1.04	0.094
RBM5	0.68	0.45-1.03	0.068
RBM6	0.73	0.49-1.09	0.126
RCOR2	1.18	0.95-1.46	0.138
REC8	0.82	0.65-1.04	0.103
REEP3	1.38	0.95-1.99	0.092
RELL2	0.66	0.41-1.08	0.098
REM1	0.57	0.35-0.91	0.019
REM2	0.54	0.24-1.18	0.123
REP15	3.99	0.89-17.75	0.07
REPIN1	0.71	0.56-0.91	0.007
REPS2	0.82	0.65-1.02	0.081
RFXAP	1.34	0.88-2.04	0.18
RGMA	0.85	0.73-1	0.053
RGPD3	0.32	0.09-1.13	0.078
RHBDL3	0.88	0.74-1.05	0.152
RHOD	1.14	0.96-1.35	0.136
RHOXF1	0.21	0.05-0.95	0.042
RIBC1	0.56	0.32-0.99	0.045
RIBC2	0.87	0.72-1.06	0.166
RIC3	0.77	0.57-1.06	0.107
RIMKLB	0.73	0.55-0.96	0.027
RINL	0.78	0.6-1	0.053
RIPPLY3	0.81	0.64-1.04	0.097
RMDN2	0.78	0.53-1.13	0.188
RMDN3	1.58	0.95-2.63	0.075
RMND5A	0.73	0.49-1.1	0.132
RMND5B	0.74	0.53-1.04	0.085
RNASE4	0.45	0.17-1.18	0.105
RNF113A	1.51	0.86-2.63	0.15
RNF135	0.66	0.41-1.06	0.084
RNF149	1.99	1.19-3.35	0.009
RNF150	0.88	0.77-1.02	0.083
RNF19A	0.73	0.54-0.99	0.04
RNF207	0.85	0.71-1.03	0.107
RNF212	0.89	0.77-1.03	0.116
RNF217	1.27	0.89-1.82	0.182
RNF32	0.66	0.46-0.93	0.018
RNPC3	0.67	0.44-1.04	0.072
ROBO2	0.76	0.61-0.93	0.008
ROBO3	1.16	0.93-1.45	0.184
RORB	0.8	0.67-0.95	0.01
RP11_111M22.2	0.61	0.4-0.93	0.02
RP11_11N7.5	0.4	0.17-0.95	0.039
RP11_12J10.3	0.29	0.1-0.83	0.021
RP11_192H23.4	0.62	0.35-1.1	0.103
RP11_216L13.17	675.84	19.45-23485.51	0
RP11_231C14.4	0.17	0.03-1.17	0.072
RP11_244H3.4	0.13	0.01-2.63	0.183
RP11_295P9.3	0.62	0.46-0.84	0.002
RP11_314N13.10	0.38	0.14-1.06	0.065
RP11_347C12.3	0.18	0.01-2.43	0.197
RP11_35N6.1	1.21	0.91-1.61	0.198
RP11_411B6.6	0.09	0-1.96	0.127
RP11_434D12.1	0.29	0.07-1.24	0.095
RP11_444E17.6	0.19	0.02-1.64	0.131
RP11_468E2.2	0	0-0.28	0.015
RP11_54C4.3	1.31	0.88-1.96	0.187
RP11_65B7.2	0.01	0-2.87	0.106
RP11_683L23.1	0.48	0.2-1.14	0.097
RP11_691N7.6	0.09	0.01-0.75	0.027
RP11_793H13.10	0.37	0.19-0.73	0.004
RP11_864I4.1	0.65	0.37-1.14	0.134
RP11_894J14.5	0.23	0.04-1.33	0.101
RP5_864K19.6	0.21	0.03-1.32	0.096
RPA1	0.75	0.49-1.15	0.181
RPA2	0.82	0.62-1.09	0.17
RPGRIP1	0.43	0.12-1.51	0.188
RPS6KA5	0.74	0.54-1	0.052
RPS6KL1	0.8	0.61-1.05	0.106
RRAGB	0.72	0.51-1.02	0.066
RSAD1	0.64	0.42-0.98	0.041
RSRP1	0.86	0.68-1.07	0.173
RTEL1_TNFRSF6B	0.72	0.48-1.08	0.112
RTN4	1.58	1.01-2.47	0.046
RUFY3	0.71	0.46-1.08	0.112
RYR3	0.74	0.6-0.9	0.002
S100A10	1.61	1.18-2.21	0.003
SALL4	0.74	0.53-1.04	0.079
SAMD10	0.76	0.58-1	0.049
SAMD9	1.2	0.98-1.47	0.076
SAP30L	0.67	0.47-0.96	0.028
SAPCD1	0.41	0.11-1.57	0.194
SARS	1.79	1.01-3.18	0.046
SARS2	0.57	0.35-0.95	0.03
SAT1	0.78	0.57-1.06	0.112
SATB1	0.83	0.68-1.01	0.057
SBK1	0.88	0.74-1.04	0.14
SCAI	0.74	0.54-1.02	0.07
SCML1	0.83	0.64-1.08	0.172
SCML2	0.77	0.59-1	0.049
SCN8A	0.84	0.65-1.09	0.185
SCNN1B	0.89	0.78-1	0.048
SCUBE2	0.82	0.67-1.01	0.061
SCUBE3	0.88	0.74-1.03	0.11
SCYL3	0.74	0.51-1.09	0.128
SDR39U1	0.72	0.46-1.14	0.162
SEC31B	0.76	0.58-0.99	0.043
SEC61A2	0.67	0.44-1.04	0.072
SELO	0.63	0.39-1.01	0.054
SEMA3C	1.31	1.09-1.59	0.005
SEMA4G	0.8	0.57-1.1	0.169
SENP7	0.78	0.57-1.07	0.12
SEPHS2	1.44	0.87-2.38	0.154
SERF1B	0.46	0.16-1.33	0.153
SERINC2	1.21	0.97-1.52	0.085
SERPINE1	1.16	1-1.34	0.05
SERPINE3	3.34	0.69-16.17	0.135
SERPINF2	0.84	0.65-1.08	0.177
SERTAD2	0.79	0.56-1.12	0.187
SESN1	0.59	0.4-0.88	0.009
SETMAR	0.76	0.54-1.08	0.123
SFI1	0.79	0.6-1.03	0.083
SFRP1	0.93	0.84-1.04	0.198
SFXN3	1.31	0.95-1.79	0.097
SGMS2	1.28	0.96-1.7	0.097
SGOL2	1.25	0.93-1.68	0.136
SGSM2	0.72	0.52-1	0.052
SGSM3	0.57	0.34-0.95	0.032
SH2D4B	0.56	0.28-1.12	0.098
SH3BGRL2	0.89	0.76-1.05	0.154
SH3BP1	1.47	0.98-2.18	0.06
SH3BP2	0.75	0.53-1.07	0.11
SH3BP4	1.4	0.91-2.15	0.129
SH3BP5	0.81	0.65-1	0.053
SH3TC2	1.26	0.96-1.65	0.092
SHANK2	1.14	1.01-1.3	0.041
SHC1	1.71	1.09-2.68	0.019
SHE	0.84	0.69-1.02	0.08
SHISA8	0.41	0.15-1.1	0.077
SHISA9	0.46	0.23-0.93	0.032
SHMT1	0.76	0.56-1.03	0.077
SHROOM2	0.76	0.59-0.99	0.041
SIGIRR	0.81	0.63-1.04	0.099
SIM2	0.89	0.77-1.02	0.085
SIN3B	0.52	0.31-0.87	0.014
SIX2	0.84	0.7-1.02	0.072
SKIDA1	0.62	0.39-1.01	0.056
SLC11A2	0.72	0.47-1.09	0.124
SLC12A4	1.41	0.92-2.15	0.113
SLC12A5	0.68	0.41-1.12	0.13
SLC16A1	1.27	1-1.61	0.054
SLC16A11	0.69	0.47-1.03	0.068
SLC16A2	1.19	1-1.42	0.045
SLC16A8	0.67	0.45-1.01	0.055
SLC18B1	0.7	0.51-0.96	0.029
SLC1A2	0.72	0.48-1.1	0.134
SLC22A15	1.36	0.98-1.91	0.069
SLC25A23	0.88	0.74-1.05	0.168
SLC25A35	0.77	0.57-1.05	0.096
SLC25A6	0.73	0.52-1.02	0.062
SLC26A1	0.69	0.47-1.01	0.056
SLC26A11	0.73	0.53-1.02	0.063
SLC27A5	0.83	0.64-1.06	0.139
SLC27A6	0.73	0.49-1.11	0.141
SLC29A4	1.15	0.93-1.43	0.188
SLC2A9	1.31	1.02-1.69	0.032
SLC35E2	0.49	0.29-0.82	0.007
SLC35E2B	0.59	0.43-0.81	0.001
SLC35F1	0.38	0.14-1.07	0.066
SLC35F3	1.16	0.96-1.39	0.122
SLC38A7	1.38	0.87-2.19	0.177
SLC39A11	1.42	0.95-2.11	0.087
SLC44A2	0.53	0.38-0.73	0
SLC44A5	1.21	1.01-1.46	0.044
SLC4A1AP	1.91	0.82-4.43	0.133
SLC51A	0.72	0.53-0.98	0.04
SLC6A8	1.22	0.97-1.53	0.096
SLFN13	0.89	0.77-1.03	0.128
SLIT1	0.57	0.33-0.99	0.045
SLITRK6	1.14	1.01-1.29	0.041
SLX1A_SULT1A3	0.03	0-1.07	0.054
SMAD2	0.76	0.52-1.13	0.178
SMAD6	0.72	0.55-0.95	0.018
SMC1B	0.85	0.73-0.98	0.028
SMIM14	0.7	0.51-0.97	0.03
SNAI2	1.23	0.93-1.63	0.15
SNAP25	0.62	0.4-0.95	0.03
SNN	0.64	0.43-0.94	0.023
SNX12	1.87	0.95-3.7	0.072
SNX14	1.93	1.09-3.41	0.023
SNX15	0.42	0.19-0.94	0.035
SNX16	0.65	0.43-0.98	0.039
SORBS2	0.86	0.72-1.03	0.106
SORCS2	1.14	0.95-1.36	0.163
SOWAHA	0.6	0.36-0.99	0.047
SOX15	1.13	0.94-1.35	0.184
SOX30	0.77	0.62-0.95	0.016
SOX4	0.81	0.67-0.98	0.034
SOX6	0.82	0.68-0.98	0.033
SOX8	0.74	0.51-1.07	0.105
SP5	0.58	0.38-0.89	0.013
SPAG17	0.83	0.7-0.98	0.027
SPATA18	0.82	0.66-1.03	0.089
SPATA25	0.4	0.16-1.04	0.061
SPATA32	0.33	0.08-1.37	0.126
SPATC1L	0.87	0.7-1.07	0.187
SPCS3	1.68	1.03-2.74	0.038
SPDYA	0.32	0.13-0.8	0.015
SPECC1L_ADORA2A	24.4	0.3-1958.34	0.153
SPIB	0.83	0.71-0.98	0.028
SPIDR	0.77	0.56-1.05	0.099
SPINK2	1.78	0.84-3.75	0.133
SPIRE2	0.84	0.69-1.03	0.101
SPRTN	0.71	0.42-1.2	0.197
SPSB2	0.81	0.6-1.08	0.143
SPSB3	0.56	0.28-1.11	0.095
SPTBN5	0.8	0.6-1.07	0.131
SPTLC3	1.15	0.98-1.34	0.083
SREBF1	0.8	0.61-1.05	0.105
SREK1	0.71	0.47-1.09	0.116
SRRM5	0.55	0.28-1.08	0.085
SRSF5	0.74	0.51-1.08	0.114
SSBP3	0.76	0.53-1.1	0.14
SSFA2	1.39	1-1.92	0.047
SSPO	0.57	0.32-1.05	0.07
ST8SIA1	0.82	0.66-1.02	0.078
STAG3	0.86	0.75-0.98	0.028
STAR	0.81	0.66-0.99	0.036
STARD4	1.37	1.02-1.84	0.035
STAU2	0.73	0.5-1.05	0.088
STK11IP	0.6	0.37-0.99	0.044
STK17A	1.29	0.95-1.77	0.107
STK36	0.75	0.52-1.06	0.102
STK38L	0.63	0.41-0.97	0.036
STKLD1	0.43	0.15-1.19	0.103
STOX2	0.84	0.69-1.02	0.085
STRN3	1.34	0.88-2.04	0.175
STX16_NPEPL1	0.49	0.22-1.12	0.09
STX3	1.45	0.94-2.22	0.089
STXBP6	0.84	0.69-1.03	0.1
SUCLA2	1.44	0.97-2.13	0.073
SUGP2	0.73	0.52-1.03	0.071
SULT1A1	1.22	0.95-1.58	0.121
SULT1A3	0.03	0-3.85	0.158
SULT1B1	0.68	0.51-0.92	0.012
SUMO4	4.17	0.53-32.91	0.175
SUPV3L1	1.66	0.94-2.94	0.082
SUSD4	0.89	0.78-1	0.059
SV2B	0.86	0.73-1.01	0.073
SVIP	0.88	0.75-1.04	0.13
SVOPL	0.69	0.4-1.18	0.179
SWAP70	0.72	0.46-1.12	0.145
SYCE1L	0.59	0.33-1.05	0.072
SYCE2	0.71	0.51-0.99	0.046
SYCP2	0.86	0.76-0.98	0.024
SYCP3	0.33	0.08-1.34	0.12
SYNE4	0.83	0.64-1.09	0.184
SYNGAP1	0.69	0.48-0.99	0.045
SYNGR1	0.89	0.75-1.05	0.175
SYNGR3	0.79	0.67-0.94	0.008
SYT1	1.19	1-1.4	0.044
SYT17	1.13	0.94-1.36	0.183
SYT7	1.19	1.01-1.4	0.036
TAF1A	1.58	1.06-2.38	0.026
TAF6L	0.59	0.38-0.92	0.018
TAF7L	0.74	0.58-0.94	0.012
TAMM41	0.61	0.39-0.97	0.036
TARBP1	0.77	0.55-1.1	0.151
TAS2R10	0.02	0-2.97	0.122
TAS2R20	0.36	0.09-1.55	0.173
TAS2R4	0.35	0.09-1.33	0.124
TBC1D12	0.59	0.37-0.94	0.026
TBC1D29	0.02	0-7.44	0.196
TBC1D4	0.75	0.57-0.98	0.036
TBCD	0.71	0.49-1.05	0.086
TBCK	2.29	1.38-3.81	0.001
TBL1X	0.8	0.64-1	0.048
TBX18	1.14	0.95-1.36	0.172
TBX6	0.85	0.69-1.04	0.109
TC2N	0.88	0.73-1.06	0.188
TCEANC2	0.68	0.43-1.06	0.09
TCHP	0.73	0.47-1.15	0.174
TCP10L	2.83	1.14-7	0.024
TCP11	0.77	0.63-0.95	0.014
TCTE3	0.71	0.43-1.17	0.18
TDRD10	0.77	0.6-0.99	0.045
TDRP	0.86	0.73-1.02	0.074
TEAD2	0.79	0.61-1.04	0.089
TEF	0.8	0.61-1.06	0.127
TELO2	0.77	0.52-1.15	0.199
TEN1_CDK3	0.54	0.32-0.9	0.019
TEPP	0.63	0.4-1	0.052
TERT	0.68	0.45-1.04	0.078
TES	1.56	0.97-2.5	0.068
TESK2	0.69	0.5-0.94	0.02
TET2	0.74	0.54-1.02	0.065
TEX15	0.82	0.65-1.04	0.104
TFDP1	1.34	1.01-1.79	0.046
TGFB1	1.38	0.94-2.02	0.105
TGFBI	1.14	0.97-1.34	0.104
THBD	1.13	0.95-1.35	0.153
THEM6	0.72	0.53-0.98	0.038
THSD1	1.23	1.02-1.49	0.033
TIA1	0.77	0.57-1.05	0.097
TIFA	0.82	0.6-1.11	0.199
TIGD3	0.54	0.29-0.99	0.047
TIMELESS	0.84	0.65-1.08	0.17
TIMM23B	1.64	0.91-2.94	0.1
TINAGL1	1.13	0.95-1.34	0.168
TJP3	0.84	0.72-0.96	0.014
TLDC1	1.25	0.93-1.66	0.136
TLE2	0.88	0.72-1.07	0.192
TLE3	0.72	0.51-1.02	0.066
TLL1	1.13	0.97-1.31	0.118
TLR5	0.83	0.68-1.02	0.076
TLX2	0.61	0.41-0.91	0.017
TM7SF3	0.81	0.62-1.05	0.111
TMBIM1	1.47	0.96-2.24	0.074
TMBIM6	1.83	0.91-3.66	0.09
TMC1	0.45	0.23-0.9	0.024
TMED8	0.7	0.45-1.11	0.129
TMEM110_MUSTN1	0.3	0.09-1.05	0.06
TMEM150C	0.84	0.71-1	0.046
TMEM151B	0.66	0.42-1.04	0.074
TMEM168	0.81	0.6-1.08	0.152
TMEM171	1.32	0.99-1.76	0.054
TMEM178B	0.91	0.81-1.03	0.132
TMEM180	0.67	0.47-0.94	0.021
TMEM181	1.98	1.16-3.36	0.012
TMEM220	0.6	0.43-0.85	0.003
TMEM260	0.7	0.49-0.99	0.041
TMEM262	0.37	0.17-0.81	0.013
TMEM80	0.66	0.47-0.93	0.017
TMEM87B	2.19	1.31-3.65	0.003
TMEM92	1.29	1.02-1.63	0.031
TMLHE	1.51	0.91-2.5	0.112
TMPRSS2	0.9	0.8-1.01	0.074
TMSB15A	0.72	0.52-1	0.049
TMSB4Y	0.62	0.43-0.89	0.009
TMTC2	0.81	0.65-1.02	0.071
TNFAIP8L1	0.76	0.52-1.1	0.15
TNFRSF11A	0.86	0.69-1.06	0.153
TNFRSF12A	1.39	1.1-1.74	0.005
TNFRSF19	0.8	0.66-0.96	0.016
TNFRSF25	0.76	0.58-0.99	0.042
TOMM20L	0.1	0-2.27	0.148
TOR4A	1.23	1-1.52	0.046
TP53	0.88	0.74-1.04	0.13
TP53TG5	0.39	0.17-0.9	0.027
TP73	0.84	0.69-1.04	0.108
TPCN2	1.46	1.15-1.84	0.002
TPH1	0.5	0.18-1.38	0.18
TRAF3IP2	1.4	0.87-2.26	0.171
TRAPPC2	0.72	0.46-1.12	0.145
TRAPPC9	0.74	0.51-1.07	0.105
TRIB3	1.33	1.01-1.76	0.043
TRIM24	0.69	0.5-0.95	0.022
TRIM3	0.55	0.32-0.92	0.024
TRIM32	1.44	1-2.07	0.051
TRIM59	0.82	0.64-1.06	0.135
TRIM6	1.41	1.07-1.84	0.013
TRIM65	0.74	0.48-1.13	0.161
TRIM66	0.82	0.61-1.1	0.192
TRIM73	0.27	0.09-0.77	0.015
TRIM74	0.22	0.05-1.08	0.062
TRPM4	0.67	0.47-0.96	0.027
TRPM6	0.8	0.59-1.09	0.154
TRPV6	0.82	0.67-1.01	0.066
TSC2	0.61	0.4-0.93	0.02
TSEN2	0.75	0.5-1.11	0.153
TSGA10	0.75	0.51-1.12	0.159
TSPAN3	1.34	0.89-2.03	0.165
TSPAN31	1.74	1.07-2.82	0.025
TSPAN5	1.25	0.95-1.64	0.109
TSSK3	0.25	0.04-1.41	0.116
TSSK4	0.44	0.24-0.81	0.009
TSTA3	1.51	1.07-2.15	0.02
TTC13	0.68	0.42-1.08	0.099
TTC21A	0.43	0.26-0.72	0.001
TTC28	0.85	0.7-1.03	0.088
TTC3	0.64	0.45-0.92	0.016
TTC30A	1.5	1.1-2.04	0.011
TTC30B	1.3	0.9-1.87	0.162
TTC34	0.4	0.14-1.15	0.088
TTC7B	1.25	0.97-1.61	0.089
TTLL1	0.69	0.47-1.02	0.06
TTLL3	0.77	0.6-1.01	0.058
TTLL5	0.68	0.42-1.11	0.126
TTPA	0.26	0.06-1.18	0.082
TUBA3D	0.32	0.08-1.31	0.114
TUBB6	1.3	1-1.69	0.047
TUBB8	0.08	0.01-0.68	0.021
TUBGCP2	0.68	0.38-1.21	0.191
TUBGCP6	0.7	0.5-0.99	0.044
TULP1	0.56	0.25-1.29	0.173
TXLNA	0.71	0.48-1.03	0.07
TXNDC16	0.79	0.62-1.02	0.068
TXNDC17	1.28	0.96-1.72	0.096
TXNDC2	3.42	0.6-19.45	0.166
TYK2	0.7	0.51-0.95	0.025
TYW1B	0.67	0.49-0.93	0.017
U2AF1	0.61	0.33-1.11	0.108
UBA6	1.4	0.95-2.07	0.085
UBAP1L	0.63	0.4-1	0.05
UBE2E2	1.29	0.89-1.88	0.183
UBE2F	1.78	1.1-2.87	0.019
UBE2Q1	1.63	0.9-2.97	0.109
UBQLN4	0.62	0.39-0.98	0.042
UBXN11	0.76	0.59-0.97	0.031
UCN2	0.82	0.62-1.1	0.18
UGGT2	1.27	0.9-1.81	0.178
UGT8	1.11	0.99-1.26	0.081
ULBP3	1.43	0.98-2.1	0.067
ULK3	0.61	0.44-0.86	0.005
UMODL1	0.69	0.45-1.07	0.094
UNC119B	0.8	0.6-1.07	0.133
UNC13B	0.69	0.54-0.89	0.004
UNK	0.47	0.28-0.81	0.006
UNKL	0.81	0.6-1.11	0.187
UPB1	0.7	0.52-0.96	0.026
UPP1	1.16	0.95-1.42	0.14
USB1	1.5	1.01-2.22	0.047
USP40	1.37	0.96-1.96	0.085
USP48	0.61	0.33-1.12	0.113
USP49	0.75	0.55-1.02	0.064
USP54	0.71	0.53-0.95	0.021
USP6	0.55	0.3-1	0.051
USP6NL	0.55	0.39-0.79	0.001
UVSSA	0.54	0.35-0.83	0.005
VAMP1	0.72	0.55-0.96	0.025
VASH2	0.82	0.64-1.05	0.119
VCAM1	0.9	0.8-1.01	0.065
VEGFC	1.28	1.1-1.49	0.002
VILL	0.74	0.57-0.98	0.034
VIP	2.12	0.84-5.33	0.111
VMA21	1.61	0.98-2.64	0.058
VMAC	0.64	0.43-0.95	0.027
VNN1	0.88	0.73-1.06	0.191
VPS37C	0.71	0.43-1.18	0.183
VSIG1	1.51	1.07-2.13	0.018
VTI1A	0.54	0.26-1.14	0.106
VWCE	0.59	0.36-0.97	0.039
VWDE	1.2	0.98-1.48	0.08
WBP4	1.53	0.89-2.63	0.12
WBSCR17	0.86	0.71-1.04	0.123
WDR19	0.69	0.51-0.95	0.022
WDR3	1.36	0.94-1.98	0.103
WDR45	0.66	0.43-1.02	0.06
WDR47	0.79	0.57-1.1	0.159
WDR60	0.69	0.46-1.04	0.078
WDR62	0.8	0.61-1.06	0.126
WDR77	1.56	0.94-2.62	0.088
WDR87	0.55	0.25-1.22	0.143
WDR90	0.84	0.66-1.08	0.174
WNK3	0.7	0.55-0.9	0.006
WNT7A	1.21	1.04-1.41	0.013
WSCD1	0.82	0.65-1.04	0.104
WTAP	1.57	0.94-2.61	0.086
WWP1	0.61	0.39-0.95	0.029
XDH	1.15	0.97-1.36	0.111
XK	0.83	0.68-1.02	0.083
XKR4	0.74	0.56-0.98	0.039
XKR5	0.68	0.42-1.09	0.109
XKR6	0.78	0.55-1.1	0.158
YBEY	0.72	0.49-1.04	0.082
YBX2	0.87	0.76-1.01	0.073
YIPF4	1.44	0.84-2.47	0.18
YIPF6	2.13	1.26-3.58	0.004
YPEL1	0.69	0.5-0.94	0.02
YPEL3	0.62	0.43-0.89	0.01
ZBED1	0.72	0.53-0.99	0.041
ZBED3	0.78	0.63-0.97	0.026
ZBTB10	1.14	0.94-1.38	0.172
ZBTB18	0.81	0.64-1.03	0.089
ZBTB24	0.7	0.44-1.12	0.141
ZBTB8A	0.76	0.52-1.11	0.152
ZBTB8B	0.44	0.17-1.14	0.09
ZC2HC1A	0.84	0.67-1.04	0.115
ZC3H10	0.72	0.46-1.12	0.147
ZCCHC11	0.64	0.41-0.98	0.04
ZCCHC18	0.3	0.11-0.87	0.027
ZCWPW2	0.18	0.05-0.68	0.011
ZDHHC18	0.69	0.4-1.19	0.183
ZFAND4	0.8	0.59-1.09	0.156
ZFHX2	0.74	0.54-1.01	0.06
ZFP2	0.44	0.16-1.18	0.104
ZFP3	0.77	0.62-0.96	0.02
ZFP69	0.61	0.38-0.98	0.041
ZFP69B	0.64	0.39-1.08	0.096
ZFR2	0.72	0.58-0.9	0.003
ZGLP1	0.61	0.33-1.13	0.116
ZIC4	0.72	0.47-1.12	0.147
ZKSCAN3	0.71	0.48-1.07	0.1
ZKSCAN8	0.8	0.58-1.1	0.171
ZMAT1	0.72	0.57-0.92	0.008
ZMIZ2	0.71	0.5-1.02	0.062
ZNF10	0.77	0.57-1.02	0.069
ZNF114	1.25	1.02-1.52	0.029
ZNF117	0.87	0.71-1.06	0.172
ZNF124	0.69	0.45-1.05	0.083
ZNF132	0.63	0.42-0.94	0.025
ZNF138	1.45	0.95-2.22	0.083
ZNF157	0.37	0.15-0.97	0.043
ZNF17	0.67	0.4-1.13	0.132
ZNF180	0.78	0.55-1.11	0.166
ZNF184	0.73	0.48-1.12	0.15
ZNF214	0.72	0.49-1.06	0.094
ZNF219	0.8	0.59-1.07	0.136
ZNF224	0.76	0.52-1.1	0.149
ZNF225	0.75	0.49-1.15	0.188
ZNF235	0.6	0.37-0.97	0.039
ZNF248	0.8	0.58-1.12	0.192
ZNF266	0.57	0.4-0.81	0.002
ZNF273	1.21	0.9-1.63	0.199
ZNF274	0.77	0.54-1.11	0.165
ZNF283	0.69	0.44-1.09	0.111
ZNF284	0.68	0.41-1.12	0.127
ZNF286A	0.72	0.46-1.13	0.154
ZNF286B	0.61	0.36-1.04	0.072
ZNF300	0.82	0.66-1.01	0.067
ZNF333	0.67	0.45-1	0.052
ZNF334	1.28	0.98-1.69	0.074
ZNF337	0.63	0.4-1	0.05
ZNF33A	0.63	0.44-0.91	0.014
ZNF341	0.64	0.37-1.13	0.123
ZNF354C	0.72	0.56-0.93	0.011
ZNF358	0.83	0.64-1.07	0.146
ZNF396	0.7	0.48-1.03	0.067
ZNF397	0.79	0.59-1.06	0.114
ZNF425	0.59	0.4-0.86	0.007
ZNF454	0.41	0.16-1.08	0.072
ZNF473	0.81	0.59-1.11	0.184
ZNF484	1.65	1.08-2.52	0.021
ZNF497	0.55	0.35-0.87	0.011
ZNF518B	0.83	0.64-1.07	0.152
ZNF524	0.64	0.42-0.99	0.043
ZNF541	0.8	0.67-0.95	0.011
ZNF546	0.7	0.48-1.02	0.06
ZNF547	0.69	0.4-1.21	0.199
ZNF554	0.63	0.43-0.91	0.013
ZNF557	0.58	0.39-0.87	0.008
ZNF558	0.71	0.52-0.99	0.041
ZNF562	0.71	0.45-1.11	0.136
ZNF564	0.39	0.16-0.97	0.042
ZNF566	0.8	0.59-1.1	0.167
ZNF57	0.64	0.42-0.99	0.044
ZNF575	0.38	0.19-0.74	0.004
ZNF586	1.38	0.88-2.17	0.162
ZNF596	0.66	0.44-0.99	0.044
ZNF599	0.77	0.52-1.14	0.188
ZNF605	0.81	0.63-1.05	0.116
ZNF620	0.75	0.55-1.03	0.077
ZNF621	0.6	0.42-0.86	0.006
ZNF644	0.75	0.51-1.11	0.15
ZNF672	0.64	0.42-0.98	0.039
ZNF680	1.22	0.92-1.62	0.176
ZNF70	0.79	0.56-1.13	0.197
ZNF700	0.7	0.49-1	0.047
ZNF732	0.63	0.4-0.99	0.045
ZNF775	0.55	0.39-0.77	0.001
ZNF778	0.61	0.39-0.97	0.037
ZNF780B	0.8	0.57-1.12	0.196
ZNF782	0.71	0.45-1.11	0.128
ZNF791	0.58	0.37-0.9	0.016
ZNF821	0.6	0.36-1.01	0.057
ZNF823	0.52	0.36-0.76	0.001
ZNF827	0.78	0.59-1.04	0.086
ZNF837	0.52	0.33-0.83	0.005
ZNF846	0.6	0.39-0.91	0.016
ZNF852	0.5	0.26-0.96	0.037
ZNF862	0.7	0.54-0.89	0.004
ZNF879	0.74	0.56-0.98	0.037
ZNF891	0.72	0.5-1.03	0.075
ZSCAN16	0.72	0.51-1	0.048
ZSCAN2	0.72	0.47-1.11	0.142
ZSCAN30	0.74	0.54-1.01	0.06
ZSCAN31	1.18	0.92-1.52	0.195
ZSCAN5D	0.04	0-1.15	0.06
ZSWIM3	0.69	0.42-1.14	0.145
ZYG11A	0.74	0.6-0.91	0.004

## Sheet: KICH
characteristics	Hazard.Ratio	CI95	P.Value
ACOXL	1.64	0.77-3.47	0.197
AMBP	0.05	0-1.17	0.063
C1orf168	0.67	0.39-1.15	0.145
CPB2	256.71	0.89-73695.42	0.055
DFFB	2	0.85-4.66	0.11
DNM3	0.16	0.02-1.08	0.061
DXO	2.24	0.74-6.78	0.152
DYNLRB2	0	0-20.95	0.109
ERICH6	59.82	0.89-4030.74	0.057
FKBPL	2.64	0.63-11.08	0.184
GPR17	0.01	0-2.32	0.101
HDDC2	1.78	0.92-3.45	0.087
HYKK	1.91	0.78-4.69	0.159
ITIH4	28.29	1.02-785.55	0.049
KLHL41	18.27	0.36-926.65	0.147
LAMTOR5	4.64	1.03-20.93	0.046
LPO	24759.4	28.48-21527915.74	0.003
MAP7D2	2.22	1.2-4.1	0.011
MPO	0	0-0.31	0.026
MXD3	1.62	1.09-2.41	0.016
NOS2	0.29	0.05-1.61	0.158
OTOG	83726.3	0.4-17716779561.12	0.07
OTX1	1.99	0.84-4.7	0.119
PDZD3	7781.2	1.82-33205129.97	0.036
SYT16	0.17	0.02-1.7	0.131
TAL2	2166.01	0.18-26691116.41	0.11
TTC9B	13.2	1.45-120.35	0.022
TYRP1	2.35	0.65-8.42	0.19
ZNF781	0.04	0-4.83	0.187

## Sheet: KIRC
characteristics	Hazard.Ratio	CI95	P.Value
ALKBH2	1.2	0.93-1.56	0.165
ANKRD39	1.74	1.25-2.41	0.001
ATP5G2	1.77	1.29-2.42	0
BTF3	0.75	0.54-1.04	0.088
C12orf45	2.09	1.58-2.78	0
C16orf13	1.28	1.07-1.55	0.008
C19orf33	1.09	0.99-1.21	0.094
C19orf48	1.57	1.26-1.94	0
C20orf27	1.77	1.29-2.42	0
C6orf48	1.57	1.22-2.02	0.001
CSNK2B	1.6	1.23-2.07	0
DAXX	1.48	0.96-2.26	0.073
DNAJC28	0.58	0.41-0.83	0.003
DRG1	0.66	0.42-1.02	0.064
EBPL	1.46	1.08-1.97	0.014
EEF1D	1.26	0.91-1.73	0.165
EEF2	0.67	0.53-0.84	0.001
EFNA3	1.4	1.15-1.7	0.001
EIF1	0.74	0.49-1.1	0.135
EIF2D	1.37	0.88-2.14	0.165
EIF3H	0.76	0.53-1.1	0.148
EIF3I	1.53	1.03-2.27	0.035
EIF4EBP1	1.52	1.32-1.75	0
EMP3	1.65	1.34-2.03	0
ERGIC3	1.54	1.06-2.23	0.022
FAM89B	1.48	1.13-1.93	0.004
FAU	1.21	0.96-1.54	0.112
FBL	1.31	0.98-1.75	0.069
FLOT1	1.95	1.32-2.88	0.001
FNIP2	0.56	0.46-0.69	0
GEMIN6	1.29	0.88-1.89	0.191
GPAM	0.68	0.51-0.92	0.013
HCFC1R1	1.21	1.01-1.44	0.035
IGBP1	0.58	0.43-0.79	0
IMPDH2	1.3	0.94-1.79	0.115
ITGB1BP1	1.79	1.26-2.53	0.001
KDELR1	1.63	1.06-2.49	0.026
LGALS1	1.55	1.32-1.82	0
LSM2	1.53	1.12-2.09	0.007
LYRM4	1.24	0.9-1.72	0.187
MAD2L2	1.59	1.23-2.06	0
MEA1	1.9	1.33-2.72	0
MRPL9	1.98	1.22-3.2	0.005
MRTO4	1.58	1.07-2.32	0.022
MZT2A	1.28	1.1-1.5	0.002
MZT2B	1.27	1.06-1.51	0.009
NACA	1.74	1.2-2.52	0.004
NAT14	1.3	1.12-1.51	0.001
NBL1	1.22	1.08-1.37	0.001
NELFE	1.63	1.14-2.32	0.007
NENF	1.24	0.99-1.54	0.061
NSA2	0.61	0.46-0.8	0
NSDHL	0.58	0.39-0.85	0.006
NUDT2	0.69	0.52-0.9	0.007
NXT1	1.78	1.34-2.37	0
ORAI3	1.51	1.21-1.88	0
PA2G4	3.22	2.03-5.1	0
PDCD2L	2.21	1.6-3.05	0
PFDN5	1.29	1.01-1.66	0.044
PHB2	1.34	0.95-1.88	0.096
PHLDA3	1.28	1.08-1.52	0.005
POLR1C	1.86	1.3-2.66	0.001
POLR1D	0.52	0.34-0.78	0.002
PRKCDBP	1.26	1.07-1.49	0.006
QARS	1.32	0.87-2.01	0.193
RAB34	1.52	1.22-1.89	0
RFC2	1.78	1.23-2.58	0.002
RHOC	1.48	1.09-2.02	0.013
RNF7	2.24	1.51-3.34	0
RPL11	1.24	0.91-1.68	0.176
RPL12	1.49	1.15-1.93	0.002
RPL13	1.45	1.18-1.77	0
RPL13A	1.39	1.07-1.81	0.015
RPL14	1.39	1.07-1.8	0.012
RPL18	1.33	1.07-1.66	0.009
RPL19	1.42	1.04-1.93	0.026
RPL21	0.61	0.46-0.81	0.001
RPL23	1.44	1.06-1.97	0.021
RPL24	1.27	1.03-1.57	0.026
RPL27	1.35	1.04-1.74	0.022
RPL27A	1.5	1.22-1.86	0
RPL28	1.53	1.24-1.88	0
RPL29	1.48	1.18-1.84	0.001
RPL30	1.48	1.09-2.01	0.013
RPL32	1.29	1.02-1.63	0.037
RPL35	1.27	1.05-1.54	0.013
RPL35A	1.35	1.04-1.74	0.022
RPL36	1.24	1.02-1.51	0.03
RPL36A	1.53	1.26-1.86	0
RPL36AL	0.71	0.54-0.94	0.015
RPL37	1.47	1.15-1.89	0.002
RPL37A	1.22	0.95-1.58	0.123
RPL38	1.48	1.17-1.88	0.001
RPL39	1.33	1.08-1.63	0.007
RPL4	1.61	1.12-2.33	0.011
RPL41	0.84	0.65-1.07	0.158
RPL6	1.71	1.25-2.34	0.001
RPL8	1.27	1.01-1.6	0.042
RPLP0	1.42	1.13-1.79	0.003
RPLP1	1.77	1.4-2.23	0
RPLP2	1.51	1.24-1.84	0
RPS11	1.27	0.97-1.68	0.086
RPS15	1.35	1.09-1.67	0.007
RPS15A	1.28	0.99-1.64	0.057
RPS16	1.22	0.96-1.54	0.101
RPS17	1.53	1.19-1.96	0.001
RPS18	1.28	1.01-1.61	0.04
RPS19	1.45	1.19-1.77	0
RPS2	1.67	1.33-2.11	0
RPS20	1.58	1.27-1.96	0
RPS24	1.63	1.23-2.15	0.001
RPS25	1.28	0.94-1.74	0.117
RPS29	0.81	0.62-1.06	0.122
RPS3	1.24	0.95-1.63	0.109
RPS3A	0.78	0.6-1.02	0.075
RPS4X	1.27	0.95-1.68	0.102
RPS7	1.46	1.15-1.85	0.002
RPS8	1.28	1.01-1.63	0.043
RPS9	1.19	0.93-1.52	0.169
RPSA	1.44	1.18-1.76	0
RRAS	1.62	1.31-2.02	0
RSL24D1	0.64	0.47-0.87	0.004
S100A10	1.41	1.09-1.81	0.008
S100A16	1.7	1.32-2.18	0
SAT2	1.33	0.99-1.8	0.059
SF3B6	1.62	1.03-2.56	0.037
SNRPC	1.89	1.28-2.79	0.001
SNRPD2	1.51	1.18-1.94	0.001
SSR2	1.3	0.95-1.78	0.096
SYCE1L	1.56	1.34-1.81	0
TAF12	1.78	1.09-2.91	0.022
TAGLN2	2.11	1.57-2.85	0
THG1L	0.82	0.63-1.07	0.151
TMEM18	0.59	0.42-0.82	0.002
TMEM216	1.3	0.91-1.88	0.151
TMSB10	1.44	1.18-1.74	0
TOP1MT	1.55	1.2-2	0.001
TSEN34	1.7	1.14-2.55	0.009
UXT	1.33	0.99-1.77	0.055
VKORC1	1.64	1.33-2.03	0
VPS51	0.66	0.53-0.82	0
ZCCHC17	0.67	0.42-1.09	0.107
ZNF32	1.33	0.95-1.86	0.097
ZNF511	1.55	1.17-2.06	0.003
ZNRD1	1.48	1.03-2.1	0.032

## Sheet: KIRP
characteristics	Hazard.Ratio	CI95	P.Value
ABHD8	1.55	0.82-2.92	0.175
AC241585.2	0.28	0.1-0.73	0.01
AC245100.1	0.39	0.25-0.62	0
ACBD4	0.52	0.34-0.81	0.004
ACOT8	0.44	0.21-0.91	0.028
AES	0.33	0.18-0.59	0
AKT1S1	1.99	0.94-4.2	0.071
ALKBH7	0.49	0.31-0.79	0.003
ANKS3	0.7	0.45-1.08	0.104
APOPT1	0.48	0.26-0.86	0.013
APRT	0.65	0.39-1.07	0.093
ARL2	0.73	0.47-1.13	0.155
ATAD3A	0.48	0.29-0.82	0.007
ATP5D	0.6	0.4-0.9	0.014
ATPIF1	0.43	0.28-0.67	0
AURKAIP1	0.45	0.26-0.77	0.003
BLOC1S1	0.56	0.34-0.92	0.021
BRMS1	0.6	0.3-1.21	0.151
C11orf68	0.53	0.26-1.06	0.072
C12orf10	0.59	0.31-1.11	0.102
C19orf25	0.39	0.23-0.68	0.001
C19orf70	0.6	0.36-1	0.05
C21orf2	0.36	0.22-0.6	0
C4orf48	0.84	0.64-1.09	0.195
C6orf136	0.36	0.2-0.65	0.001
C6orf226	0.38	0.24-0.62	0
C8orf82	0.5	0.3-0.83	0.007
C9orf116	0.61	0.44-0.85	0.003
C9orf16	0.73	0.5-1.08	0.114
CAPNS1	0.31	0.16-0.59	0
CCDC102A	0.66	0.47-0.91	0.013
CCDC106	0.4	0.28-0.55	0
CCDC12	0.42	0.22-0.77	0.005
CCDC85B	1.31	0.91-1.88	0.151
CCDC94	0.46	0.24-0.87	0.016
CCS	0.58	0.38-0.87	0.009
CDIPT	1.69	0.77-3.7	0.187
CDK10	0.48	0.34-0.68	0
CHMP1A	0.33	0.17-0.64	0.001
CHMP2A	0.57	0.29-1.12	0.105
CLN3	1.72	0.95-3.1	0.072
COG4	0.29	0.14-0.6	0.001
COG8	0.46	0.3-0.7	0
COMMD4	0.62	0.33-1.13	0.118
COMTD1	0.8	0.58-1.1	0.169
COQ4	0.3	0.18-0.49	0
COX4I1	0.51	0.34-0.77	0.001
CPTP	0.5	0.3-0.83	0.008
CRELD2	1.59	0.88-2.87	0.128
CUEDC2	0.5	0.28-0.87	0.015
DAPK3	1.58	0.82-3.02	0.171
DDAH2	0.75	0.53-1.06	0.107
DDX19B	0.23	0.11-0.49	0
DEAF1	0.52	0.29-0.96	0.036
DEF8	0.2	0.11-0.39	0
DGCR14	0.46	0.24-0.89	0.02
DNAJC4	0.45	0.28-0.74	0.001
DPCD	0.74	0.48-1.14	0.174
ECI1	0.65	0.44-0.95	0.026
EDF1	0.65	0.4-1.07	0.088
EGLN2	0.7	0.42-1.16	0.169
ENKD1	0.59	0.45-0.77	0
EPN1	0.56	0.32-0.99	0.047
ETV2	0.26	0.11-0.61	0.002
FAM173A	0.76	0.52-1.11	0.156
FAM3A	0.46	0.22-0.96	0.039
FAM71E1	0.61	0.38-0.98	0.042
FBXL15	0.55	0.33-0.91	0.02
FBXW4	0.49	0.25-0.94	0.032
FKBP2	0.51	0.32-0.82	0.006
FUK	0.36	0.23-0.58	0
GAS8	0.3	0.2-0.45	0
GFER	0.64	0.35-1.18	0.15
GPANK1	0.53	0.27-1.03	0.061
GSDMD	0.54	0.34-0.86	0.01
HCFC1R1	0.8	0.58-1.12	0.191
HINT2	0.36	0.24-0.55	0
HIRIP3	0.51	0.27-0.95	0.034
HMOX2	0.55	0.29-1.03	0.06
HRAS	0.64	0.38-1.06	0.085
HSF1	3.43	1.52-7.74	0.003
HSPB1	1.33	0.92-1.93	0.133
IFI27L1	0.53	0.35-0.81	0.003
IFT43	0.47	0.28-0.8	0.006
ISOC2	0.71	0.43-1.15	0.163
ITPA	0.42	0.26-0.66	0
JMJD4	1.47	0.84-2.55	0.177
JMJD8	0.41	0.23-0.73	0.003
KLHDC4	0.32	0.18-0.6	0
LBX2	0.66	0.46-0.94	0.02
LENG1	0.38	0.2-0.74	0.004
LMF1	0.54	0.32-0.92	0.023
LRRC23	0.49	0.33-0.73	0
LRRC29	0.51	0.32-0.81	0.004
MAF1	2.04	0.87-4.78	0.103
MAP3K11	0.65	0.33-1.26	0.198
MBD3	0.66	0.38-1.17	0.157
MCRS1	0.26	0.12-0.57	0.001
MED16	0.46	0.22-0.98	0.044
MLST8	0.61	0.29-1.28	0.188
MOB2	0.44	0.23-0.86	0.017
MPV17L2	0.58	0.28-1.21	0.146
MRPL20	0.43	0.21-0.86	0.017
MRPL24	1.52	0.87-2.66	0.142
MRPL40	0.56	0.34-0.93	0.026
MRPL43	0.41	0.18-0.97	0.042
MRPL54	0.49	0.29-0.84	0.01
MRPL57	0.42	0.2-0.89	0.023
MSRB2	0.48	0.3-0.76	0.002
MTHFSD	0.38	0.2-0.72	0.003
MVD	0.41	0.23-0.74	0.003
NAA38	0.61	0.37-1.01	0.057
NARFL	0.45	0.26-0.78	0.004
NAT14	0.66	0.49-0.89	0.007
NCLN	2.41	1.23-4.7	0.01
NDUFA11	0.67	0.4-1.12	0.124
NDUFA13	0.66	0.41-1.07	0.092
NDUFA3	0.68	0.43-1.1	0.116
NDUFA7	0.59	0.32-1.1	0.097
NDUFB10	0.64	0.38-1.08	0.093
NDUFB7	0.64	0.38-1.08	0.096
NDUFB8	0.5	0.3-0.82	0.007
NDUFC2	0.61	0.31-1.19	0.148
NDUFS5	0.56	0.34-0.91	0.02
NDUFS8	0.44	0.26-0.72	0.001
NFKBIB	0.52	0.24-1.09	0.083
NMRAL1	0.52	0.36-0.75	0
NRTN	0.83	0.63-1.09	0.186
NSMCE1	0.68	0.4-1.16	0.162
NT5C	0.65	0.47-0.89	0.007
NUDT16L1	0.37	0.17-0.79	0.01
NUDT18	0.42	0.25-0.71	0.001
NUDT22	0.26	0.15-0.43	0
NUDT8	0.55	0.36-0.84	0.006
PCSK1N	0.87	0.72-1.05	0.139
PDF	0.74	0.56-0.99	0.043
PEX11G	0.31	0.21-0.46	0
PEX16	0.45	0.22-0.94	0.034
PHKG2	0.63	0.36-1.11	0.109
PHPT1	0.62	0.41-0.95	0.026
PIGQ	0.51	0.32-0.82	0.005
PIN1	0.34	0.16-0.69	0.003
PMF1	0.6	0.32-1.14	0.12
PMVK	0.46	0.25-0.86	0.015
POLR2E	0.52	0.26-1.06	0.073
POLR2L	0.53	0.32-0.88	0.015
PPAN	1.57	0.93-2.64	0.089
PPCDC	0.53	0.28-1.01	0.054
PPDPF	0.55	0.37-0.82	0.003
PPP1R16A	0.64	0.41-0.98	0.042
PRADC1	0.45	0.29-0.7	0
PSMB6	0.47	0.27-0.83	0.009
PSMC3	0.51	0.22-1.16	0.109
PSMG4	1.47	0.82-2.66	0.198
PTDSS2	0.58	0.34-1	0.048
PYURF	0.55	0.26-1.19	0.13
RABEP2	0.37	0.21-0.64	0
RABL6	0.37	0.19-0.72	0.004
RANGRF	0.44	0.26-0.76	0.003
RHOT2	0.44	0.24-0.79	0.006
RNF208	0.55	0.35-0.86	0.009
RNPEPL1	0.63	0.36-1.11	0.111
RNPS1	2.89	1.25-6.69	0.013
ROGDI	0.46	0.29-0.72	0.001
RP11_195F19.5	0.33	0.16-0.7	0.004
RPP25L	0.4	0.21-0.78	0.007
SAC3D1	1.57	0.98-2.52	0.059
SCAND1	0.73	0.49-1.09	0.12
SCRN2	0.4	0.25-0.64	0
SCYL1	0.34	0.13-0.87	0.025
SDHAF1	0.53	0.25-1.14	0.103
SERGEF	0.62	0.33-1.15	0.127
SLC2A4RG	0.55	0.36-0.85	0.007
SNAPC2	1.51	0.87-2.6	0.141
SNRNP25	0.61	0.35-1.07	0.085
SNRPA	2.26	1.18-4.33	0.014
SPATA2L	0.6	0.37-0.95	0.03
SPATA33	0.6	0.4-0.9	0.015
SPG7	0.19	0.1-0.37	0
STUB1	0.53	0.29-0.96	0.035
STX8	0.48	0.29-0.81	0.006
SURF1	0.44	0.26-0.75	0.003
SWSAP1	0.32	0.15-0.67	0.003
SYCE1L	0.82	0.65-1.03	0.088
TFPT	0.65	0.36-1.19	0.165
THAP3	0.65	0.36-1.17	0.146
THAP7	0.6	0.34-1.06	0.077
TM7SF2	0.57	0.42-0.79	0.001
TMEM11	0.58	0.28-1.21	0.145
TMEM134	0.39	0.22-0.69	0.001
TMEM161A	1.98	1.02-3.87	0.045
TMEM219	0.4	0.22-0.75	0.004
TMEM222	0.33	0.17-0.64	0.001
TRADD	0.5	0.31-0.8	0.004
TRAPPC1	0.45	0.27-0.75	0.002
TRAPPC2L	0.6	0.35-1.03	0.063
TRAPPC6A	0.6	0.33-1.09	0.093
TRPT1	0.4	0.21-0.75	0.004
TUFM	0.55	0.32-0.94	0.029
UBALD1	0.66	0.38-1.15	0.144
UBXN6	0.33	0.18-0.61	0
UCK1	0.47	0.26-0.84	0.011
URM1	0.5	0.25-1.02	0.055
VAMP8	0.52	0.31-0.89	0.016
VEGFB	0.63	0.38-1.04	0.073
VKORC1	1.62	0.99-2.67	0.056
VPS28	0.56	0.3-1.03	0.06
VPS4A	0.29	0.16-0.5	0
VPS9D1	0.38	0.24-0.59	0
WDR13	0.56	0.33-0.94	0.028
WDR18	0.61	0.36-1.04	0.071
WDR24	0.53	0.26-1.08	0.082
WDR34	0.49	0.32-0.75	0.001
YDJC	1.5	0.94-2.41	0.089
ZDHHC12	0.71	0.43-1.18	0.181
ZFAND2B	0.39	0.23-0.66	0
ZFPM1	0.63	0.39-1.01	0.053
ZNF428	0.63	0.35-1.13	0.12
ZNF524	0.65	0.39-1.09	0.101
ZNF688	0.57	0.34-0.98	0.04
ZNF747	0.45	0.23-0.9	0.024
ZNF787	1.83	0.97-3.42	0.06

[truncated: 8 more sheets: LUAD, LUSC, OV, PRAD, READ, STAD, THCA, UCEC]
