# Supplementary material for: Weighted gene coexpression network analysis and machine learning reveal oncogenome associated microbiome plays an important role in tumor immunity and prognosis in pan-cancer
Source: J Transl Med. 2023 Aug 12;21:537. doi: 10.1186/s12967-023-04411-0 (PMC10422781; doi:10.1186/s12967-023-04411-0)
Supplement: Supplementary file 12 — Additional file 12. Table S8. CARS score for prognosis-related tumor microbiome. CARS: correlation-adjusted regression survival. [file 12967_2023_4411_MOESM12_ESM.xlsx]

## Sheet: BLCA
feature	score
g__Thermothelomyces	0.13734
g__Tissierella	0.113799
g__Planctopirus	0.0814802
g__Crocosphaera	0.0783052
g__Pedobacter	0.0780566
g__Fortiea	0.0779951
g__Metschnikowia	0.0741271
g__Simplicispira	0.0717918
g__Bacillus	0.0691587
g__Ferruginivarius	0.064212
g__Pelagivirga	0.0627398
g__Phialemoniopsis	0.0615759
g__Frankia	0.0596162
g__Enterocloster	0.0554407
g__Jishengella	0.0548729
g__Morococcus	0.054389
g__Finegoldia	0.049505
g__Alicycliphilus	0.0490329
g__Abiotrophia	0.0480115
g__Cladophialophora	0.0467105
g__Angelakisella	0.0447496
g__Reyranella	0.0429327
g__Gardnerella	0.0426709
g__Deinococcus	0.0403616
g__Janthinobacterium	0.0403176
g__Sneathia	0.0402025
g__Atopostipes	0.0394218
g__Verticillium	0.0387376
g__Pseudovirgaria	0.0374693
g__Parabacteroides	0.0369803
g__Tolypothrix	0.0359747
g__Solobacterium	0.0349021
g__Dankookia	0.0339392
g__Xylona	0.0339303
g__Debaryomyces	0.0330871
g__Tilletiaria	0.0324469
g__Colletotrichum	0.0324224
g__Pochonia	0.0322643
g__Paracnuella	0.0322289
g__Rhodothermus	0.0321711
g__Pseudoalteromonas	0.0317898
g__Stomatobaculum	0.0312666
g__Chromatocurvus	0.0312369
g__Cutaneotrichosporon	0.030323
g__Oligella	0.0291529
g__Erysipelatoclostridium	0.0285723
g__Kwoniella	0.0284734
k__Bacteria_p__Firmicutes_c__Clostridia_o__Clostridiales_f__Clostridiales.Family.XIII..Incertae.Sedis_g__	0.0282745
g__Eubacterium	0.0279373
g__Rhodococcus	0.0277999
g__Ferrimonas	0.0272728
g__Dielma	0.0271202
g__Peptostreptococcus	0.0268305
g__Alternaria	0.0268065
g__Longibaculum	0.0266656
g__Slackia	0.0255173
g__Veillonella	0.0252145
g__Anaerotruncus	0.0246902
g__Bacteroides	0.0243065
g__Vibrio	0.0233529
g__Emergencia	0.0225863
g__Mogibacterium	0.0210919
k__Bacteria_p__Proteobacteria_c__Epsilonproteobacteria_o__Campylobacterales_f__Campylobacteraceae_g__	0.0196169
g__Absiella	0.0193518
g__Hungatella	0.0193298
g__Natronoflexus	0.0192131
g__Anaerobacillus	0.01869
g__Microbulbifer	0.0183887
k__Bacteria_p__Firmicutes_c__Bacilli_o__Lactobacillales_f___g__	0.0182758
k__Bacteria_p__Firmicutes_c__Tissierellia_o___f___g__	0.0181406
g__Lachnoanaerobaculum	0.017692
g__Tyzzerella	0.017665
g__Coleofasciculus	0.0174232
g__Eikenella	0.0174095
g__Anaerotignum	0.0166885
g__Cyanobium	0.0165973
g__Akkermansia	0.0164175
g__Sulfurovum	0.0163808
g__Lachnospira	0.015792
g__Faecalicatena	0.0157619
g__Coprococcus	0.0157511
g__Blastomonas	0.0154011
g__Vagococcus	0.015386
g__Blastococcus	0.0153093
g__Anaerostipes	0.0152836
g__Nannizzia	0.0151943
g__Leptotrichia	0.0150472
g__Hoeflea	0.0141733
k__Bacteria_p__Firmicutes_c__Bacilli_o__Bacillales_f__Sporolactobacillaceae_g__	0.013863
g__Cryptococcus	0.0138612
g__Mageeibacillus	0.0137008
g__Aeromicrobium	0.0134507
g__Lactonifactor	0.0129676
g__Tannerella	0.0122251
g__Barnesiella	0.0119713
g__Scardovia	0.0119023
g__Massilimicrobiota	0.0116214
g__Fusicatenibacter	0.0115372
g__Mediterraneibacter	0.011485
g__Parolsenella	0.0114423
g__Litorilinea	0.0111431
g__Gemella	0.0110578
g__Ornithinibacillus	0.010901
g__Cecembia	0.0108233
g__Massilistercora	0.0105465
g__Azonexus	0.0105295
g__Sulfurivermis	0.0103588
g__Kazachstania	0.0103464
g__Intestinibaculum	0.0102371
g__Taibaiella	0.010233
g__Eisenbergiella	0.00999451
g__Chaetomium	0.0097691
g__Neoactinobaculum	0.00960403
g__Massilioclostridium	0.0093337
g__Senegalimassilia	0.00930431
g__Massilimaliae	0.00930215
g__Devosia	0.00873076
k__Bacteria_p__Firmicutes_c__Clostridia_o__Clostridiales_f__Oscillospiraceae_g__	0.00866106
g__Alistipes	0.00864849
g__Pestalotiopsis	0.00862771
g__Oribacterium	0.0083545
g__Prevotella	0.00793758
g__Bulleidia	0.00781342
k__Bacteria_p__Actinobacteria_c__Coriobacteriia_o__Coriobacteriales_f__Coriobacteriaceae_g__	0.00780471
g__Scopulibacillus	0.00762834
g__Eggerthia	0.0076113
g__Lactimicrobium	0.00729231
g__Streptacidiphilus	0.00723922
g__Lachnoclostridium	0.0068943
g__Serpula	0.00688934
g__Syntrophomonas	0.0066082
g__Cryobacterium	0.00656991
g__Desulfonispora	0.00626563
g__Paenarthrobacter	0.00624594
g__Lapillicoccus	0.00620478
g__Johnsonella	0.00617627
g__Desulfotomaculum	0.00600732
g__Coprobacter	0.00572962
g__Mycolicibacter	0.00560854
g__Fusobacterium	0.00541431
g__Streptococcus	0.00517718
g__Paracraurococcus	0.00511905
g__Alloprevotella	0.00498811
g__Leclercia	0.00462623
g__Massilibacterium	0.00454636
g__Coprobacillus	0.00439856
g__Catenulispora	0.00431949
g__Phragmitibacter	0.00391202
g__Aneurinibacillus	0.00374852
g__Halarcobacter	0.00372875
g__Naumovozyma	0.0035912
g__Roseburia	0.00333326
g__Duncaniella	0.00325499
g__Phascolarctobacterium	0.00315354
g__Butyricicoccus	0.00310218
k__Bacteria_p__Bacteroidetes_c__Bacteroidia_o__Bacteroidales_f___g__	0.00293785
g__Sinomonas	0.00255042
g__Lachnobacterium	0.00236509
g__Paraprevotella	0.00127789
g__Porphyromonas	0.00120756
g__Olsenella	0.00103925
g__Spirosoma	0.00101984
g__Serinicoccus	0.000992063
k__Bacteria_p__Proteobacteria_c__Gammaproteobacteria_o___f___g__	0.000842858
g__Parvimonas	0.000714618
g__Moellerella	0.00011696

## Sheet: BRCA
feature	score
g__Bradyrhizobium	0.232951
g__Crocosphaera	0.152204
g__Virgibacillus	0.133343
k__Bacteria_p__Firmicutes_c__Clostridia_o__Clostridiales_f___g__	0.130548
k__Bacteria_p__Proteobacteria_c__Betaproteobacteria_o__Burkholderiales_f__Sutterellaceae_g__	0.129039
g__Rubrivivax	0.121601
g__Blastomonas	0.121218
g__Jeotgalicoccus	0.120424
g__Alcanivorax	0.112344
g__Collinsella	0.109606
g__Brevibacterium	0.103115
g__Kribbia	0.101913
g__Cyberlindnera	0.0996479
g__Parascardovia	0.0984455
g__Herpetosiphon	0.0961878
g__Lautropia	0.093692
g__Gemmobacter	0.0896991
g__Amorphotheca	0.082485
g__Tenacibaculum	0.0821647
g__Tepidimonas	0.0812525
g__Auricoccus	0.0804286
g__Westerdykella	0.0794781
g__Micrococcus	0.0783589
k__Bacteria_p__Bacteroidetes_c__Bacteroidia_o__Bacteroidales_f__Prevotellaceae_g__	0.0773554
g__Grosmannia	0.0758426
g__Abyssicoccus	0.0733004
g__Tumebacillus	0.071578
g__Neisseria	0.0715366
g__Dermabacter	0.0704758
g__Rhodobacter	0.0698815
g__Mangrovicoccus	0.0670748
g__Lachnospira	0.0645071
g__Nocardioides	0.0625888
g__Cupriavidus	0.0604776
g__Tannerella	0.0599793
g__Aeromonas	0.0594016
k__Bacteria_p__Proteobacteria_c__Gammaproteobacteria_o__Enterobacterales_f__Enterobacteriaceae_g__	0.0591474
g__Pseudoruminoccoccus	0.0589708
g__Veillonella	0.0587623
g__Edwardsiella	0.058097
g__Stomatobaculum	0.0556629
g__Methylobacillus	0.0544772
g__Rothia	0.0541364
g__Herbaspirillum	0.0521781
g__Metakosakonia	0.0489839
g__Kibdelosporangium	0.048163
k__Bacteria_p__Proteobacteria_c__Gammaproteobacteria_o__Pasteurellales_f__Pasteurellaceae_g__	0.0481356
g__Pseudoramibacter	0.0481198
g__Williamsia	0.0478138
g__Kangiella	0.0474214
g__Xenorhabdus	0.0468958
g__Kosakonia	0.0466794
g__Deinococcus	0.0457214
g__Agrococcus	0.0446114
g__Provencibacterium	0.04308
g__Proteus	0.0427723
g__Kwoniella	0.0426501
g__Plesiomonas	0.0400014
g__Algoriphagus	0.0396055
g__Raineyella	0.0387549
g__Xylona	0.0387403
g__Alternaria	0.0375797
g__Gibbsiella	0.0368099
g__Pauljensenia	0.0367922
g__Ezakiella	0.0365402
g__Granulicoccus	0.0365108
g__Lutibacter	0.0357271
g__Aquirufa	0.0355375
g__Actinobacillus	0.0354698
g__Trinickia	0.0342374
g__Oscillochloris	0.0340103
g__Dermacoccus	0.0336701
g__Kitasatospora	0.0324894
g__Escherichia	0.0323142
g__Halomonas	0.0321266
g__Streptobacillus	0.0318364
g__Thioalkalivibrio	0.0317315
g__Rikenella	0.0309477
g__Tatumella	0.0304921
g__Trichococcus	0.0301691
g__Mixta	0.0298823
g__Phycicoccus	0.0294774
g__Yersinia	0.0292467
g__Filomicrobium	0.0292281
g__Izhakiella	0.0291585
g__Arcticibacter	0.0289554
g__Riemerella	0.0289253
g__Hymenobacter	0.0285042
g__Azonexus	0.0280824
g__Metasolibacillus	0.0278772
g__Slackia	0.0275167
g__Frischella	0.0275137
g__Carideicomes	0.0266502
g__Flaviflexus	0.0266193
g__Pectobacterium	0.026486
g__Pseudocitrobacter	0.0262484
g__Buttiauxella	0.0258946
g__Naumannella	0.0250597
g__Rheinheimera	0.0249905
g__Pseudescherichia	0.0248377
g__Propionivibrio	0.0247716
g__Aliivibrio	0.0243329
g__Planococcus	0.0240635
g__Desulfovibrio	0.0237855
g__Neoactinobaculum	0.0235082
g__Enterobacter	0.02322
g__Petrocella	0.0229006
g__Pimelobacter	0.0221424
g__Kluyvera	0.0221209
g__Allokutzneria	0.0219343
g__Trabulsiella	0.0211311
g__Fastidiosipila	0.0208929
g__Olsenella	0.0208113
g__Altererythrobacter	0.0204853
g__Paenirhodobacter	0.0204694
g__Exserohilum	0.020314
g__Methylovulum	0.0202492
g__Ureaplasma	0.0200484
g__Aureobasidium	0.0194399
g__Rhodopirellula	0.0194394
g__Ignatzschineria	0.0192286
g__Anaerobium	0.0188913
k__Bacteria_p__Firmicutes_c__Bacilli_o__Lactobacillales_f__Streptococcaceae_g__	0.0187037
g__Hafnia	0.0182581
g__Pluralibacter	0.0181545
g__Pandoraea	0.018121
g__Citrobacter	0.0176468
g__Serratia	0.0172706
g__Propionimicrobium	0.0172141
g__Auraticoccus	0.0171456
g__Gallibacterium	0.0167841
g__Frondihabitans	0.0166444
g__Acetanaerobacterium	0.016415
g__Streptosporangium	0.0163575
g__Mycetocola	0.0161062
g__Kockovaella	0.0158342
g__Kurthia	0.0154716
g__Chromatocurvus	0.015424
g__Fertoebacter	0.0153766
g__Morganella	0.0150612
g__Leclercia	0.0150479
g__Entomoplasma	0.0146203
g__Wickerhamomyces	0.0144637
g__Devriesea	0.0140262
g__Salmonella	0.0139986
g__Pantoea	0.0138986
g__Glaciihabitans	0.0138709
g__Pseudoalteromonas	0.0136549
g__Oscillatoria	0.0135896
g__Neohortaea	0.0134792
g__Mycobacteroides	0.0132609
g__Microbispora	0.0132087
g__Thioflexothrix	0.0131324
g__Gilliamella	0.0131261
g__Thauera	0.0128034
g__Phragmitibacter	0.012667
g__Methylococcus	0.012571
g__Klebsiella	0.0125512
g__Phascolarctobacterium	0.0123318
k__Bacteria_p__Proteobacteria_c__Gammaproteobacteria_o__Enterobacterales_f__Hafniaceae_g__	0.0118135
g__Venustampulla	0.0116193
g__Microlunatus	0.0113939
g__Cedecea	0.0113373
g__Desertiactinospora	0.0112937
g__Phytobacter	0.0112637
g__Providencia	0.0109538
g__Atlantibacter	0.0108982
g__Lelliottia	0.0103245
g__Edaphovirga	0.0102875
g__Neorhizobium	0.00992533
g__Devosia	0.00991161
g__Brenneria	0.00964847
g__Franconibacter	0.00954434
g__Cercospora	0.0093125
g__Stenoxybacter	0.00911063
g__Siccibacter	0.0088514
g__Rhodopseudomonas	0.0085376
g__Scytonema	0.00841781
g__Chania	0.00809566
g__Limnobaculum	0.00804213
g__Nissabacter	0.00770455
g__Caballeronia	0.00728542
g__Peptoanaerobacter	0.00725851
g__Halothiobacillus	0.00725185
g__Obesumbacterium	0.0071907
g__Rhodoferax	0.00687966
g__Pseudoglutamicibacter	0.0061055
g__Rahnella	0.00579535
g__Erwinia	0.00532486
g__Paeniglutamicibacter	0.00518439
g__Flavobacterium	0.00511134
g__Alloiococcus	0.00490119
g__Micropruina	0.00476607
g__Afipia	0.00466372
g__Raoultella	0.00464317
g__Thiolinea	0.00459693
g__Mangrovibacter	0.00453741
g__Chimaeribacter	0.00439243
g__Rappaport	0.0043522
g__Lonsdalea	0.00434901
g__Thioclava	0.00409886
g__Shimwellia	0.0032415
g__Tychonema	0.00310882
g__Labilibaculum	0.00305096
g__Avibacterium	0.00297802
g__Pseudaminobacter	0.00277341
g__Cyanobium	0.00260862
g__Criibacterium	0.00221436
g__Dickeya	0.00206384
g__Yokenella	0.00163497
g__Brachyspira	0.00156539
k__Bacteria_p__Actinobacteria_c__Actinobacteria_o__Actinomycetales_f__Actinomycetaceae_g__	0.00150008
g__Samsonia	0.00125956
g__Cronobacter	0.00110526
g__Ferruginivarius	0.000984476
g__Zymoseptoria	0.000823659
g__Cladophialophora	0.000805842
g__Asticcacaulis	0.0007727
g__Pleomorphomonas	0.000750957
g__Nitrobacter	0.000685004
g__Kalamiella	0.000501015
g__Sphaerospermopsis	0.00036452
g__Nodularia	0.000277738
g__Enterobacillus	0.000253253

## Sheet: CESC
feature	score
g__Cellulomonas	0.210765
g__Verticillium	0.151781
g__Pelagivirga	0.133549
g__Fonsecaea	0.129669
g__Paenarthrobacter	0.103556
g__Mycoplasma	0.0934739
g__Tatumella	0.0877527
g__Gleimia	0.0829542
g__Purpureocillium	0.0813653
g__Ochrobactrum	0.0757269
g__Aliicoccus	0.0724116
g__Cyberlindnera	0.0635066
k__Bacteria_p___c___o___f___g__	0.0631224
g__Acetobacter	0.0627843
g__Psychrobacter	0.0573413
g__Lactobacillus	0.0559929
g__Tetrasphaera	0.0558774
g__Kangiella	0.0536684
g__Alicycliphilus	0.0504153
g__Tissierella	0.0503227
g__Actinocorallia	0.0494191
g__Trinickia	0.0489823
g__Podospora	0.0418986
g__Caldanaerobacter	0.0394082
g__Macroventuria	0.0360074
g__Pauljensenia	0.0347519
g__Zavarzinia	0.0332984
g__Tetzosporium	0.0324485
g__Carnobacterium	0.0318159
g__Reyranella	0.0310554
g__Methylocystis	0.0301471
g__Pannonibacter	0.0298146
g__Marmoricola	0.0278718
g__Enhydrobacter	0.027021
g__Thalassobacter	0.0264731
g__Propionibacterium	0.0256468
g__Afipia	0.025384
g__Croceicoccus	0.0252178
g__Enterovirga	0.0237278
g__Hansschlegelia	0.0235225
g__Terracoccus	0.0217657
g__Clavibacter	0.0210031
g__Neorhizobium	0.0202754
g__Chelatococcus	0.0193947
g__Dolosigranulum	0.018925
g__Gibbsiella	0.0158467
g__Paraoceanicella	0.0153022
g__Heliobacterium	0.0127
g__Mangrovicoccus	0.0122701
g__Rhizobium	0.00655157
g__Parascardovia	0.0052096
g__Pseudomonas	0.00287257

## Sheet: COAD
feature	score
g__Phialemoniopsis	0.311551
g__Limnospira	0.300237
g__Roseateles	0.254797
g__Solimonas	0.245218
g__Xenophilus	0.240197
g__Rhodovastum	0.224723
g__Kushneria	0.222421
g__Anaerotruncus	0.171679
g__Methylobacterium	0.156126
g__Parasutterella	0.154596
g__Eikenella	0.139107
g__Azospirillum	0.134881
g__Stomatobaculum	0.123339
g__Zoogloea	0.120455
k__Bacteria_p__Proteobacteria_c__Betaproteobacteria_o__Burkholderiales_f__Alcaligenaceae_g__	0.109336
k__Bacteria_p__Proteobacteria_c__Betaproteobacteria_o__Burkholderiales_f__Sutterellaceae_g__	0.108843
g__Myroides	0.0941151
g__Streptococcus	0.0919571
k__Bacteria_p__Actinobacteria_c__Coriobacteriia_o__Eggerthellales_f__Eggerthellaceae_g__	0.0907313
g__Methyloversatilis	0.0907056
g__Pontibacillus	0.0904554
g__Tepidiphilus	0.0894633
k__Bacteria_p__Proteobacteria_c__Gammaproteobacteria_o__Pasteurellales_f__Pasteurellaceae_g__	0.0889352
g__Lactobacillus	0.0888781
g__Pseudodesulfovibrio	0.0874161
g__Candidimonas	0.0805349
g__Neisseria	0.0788569
g__Chitinilyticum	0.078537
g__Parapedobacter	0.0755601
g__Pararheinheimera	0.0726786
g__Peptacetobacter	0.0726528
g__Veillonella	0.0698538
g__Propionibacterium	0.0693007
g__Duodenibacillus	0.0692957
g__Micromonospora	0.0672299
k__Bacteria_p__Firmicutes_c___o___f___g__	0.0660753
g__Turicibacter	0.0650519
g__Amphibacillus	0.0645011
g__Barnesiella	0.0601933
g__Microvirgula	0.0577113
g__Desulfovibrio	0.0576461
k__Bacteria_p__Proteobacteria_c__Deltaproteobacteria_o__Desulfovibrionales_f__Desulfovibrionaceae_g__	0.0532809
g__Barrientosiimonas	0.0527408
g__Adlercreutzia	0.0500704
g__Apibacter	0.0473624
g__Azotobacter	0.0467258
k__Bacteria_p__Bacteroidetes_c__Bacteroidia_o__Bacteroidales_f__Bacteroidaceae_g__	0.0464814
g__Brevirhabdus	0.0445891
g__Chelonobacter	0.0445389
g__Dissoconium	0.0400594
g__Proteiniclasticum	0.038322
g__Pseudoalteromonas	0.0381705
g__Kiloniella	0.0314099
k__Bacteria_p__Actinobacteria_c__Actinobacteria_o__Actinomycetales_f__Actinomycetaceae_g__	0.0313388
g__Vallitalea	0.0281779
g__Sparassis	0.0266636
g__Chitinophaga	0.0257459
g__Arenimonas	0.0256236
g__Rivicola	0.0244057
g__Vaginella	0.0243899
g__Pasteurella	0.0238262
g__Anaerobiospirillum	0.0232019
g__Rubrobacter	0.0231616
g__Aerosticca	0.0207395
g__Synergistes	0.0158867
g__Sphingobacterium	0.0142109
g__Halotalea	0.0126741
g__Tistrella	0.0111328
g__Roseimicrobium	0.00797493
g__Phaeodactylibacter	0.00786042
g__Microbulbifer	0.00747578
g__Eisenbergiella	0.00712842
g__Ancrocorticia	0.00539032
g__Amniculibacterium	0.00400171
g__Kingella	0.00311031
g__Morococcus	0.00198495
g__Asaccharobacter	0.00148988
g__Acinetobacter	0.000200813

## Sheet: ESCA
feature	score
g__Shimazuella	0.387315
g__Pseudogemmobacter	0.350941
g__Shimia	0.3435
g__Aureibacillus	0.288441
g__Coriobacterium	0.280319
g__Roseomonas	0.25514
g__Indioceanicola	0.238729
g__Desulfobacca	0.20791
g__Larkinella	0.202321
g__Mesorhizobium	0.197945
g__Suttonella	0.193029
g__Ezakiella	0.192124
g__Marasmitruncus	0.18059
g__Phaseolibacter	0.176646
g__Allochromatium	0.173897
g__Chania	0.17182
g__Rhodobaca	0.16802
g__Verruconis	0.165017
g__Casimicrobium	0.159455
g__Corticibacter	0.157009
g__Aneurinibacillus	0.152767
k__Bacteria_p__Proteobacteria_c__Gammaproteobacteria_o__Enterobacterales_f__Hafniaceae_g__	0.150427
g__Flavobacterium	0.149678
k__Bacteria_p__Proteobacteria_c__Betaproteobacteria_o__Burkholderiales_f__Alcaligenaceae_g__	0.144216
g__Actinomycetospora	0.143927
g__Thiohalocapsa	0.142752
g__Neptunomonas	0.14002
g__Pontivivens	0.137397
g__Brevibacterium	0.136963
g__Thermus	0.136683
g__Alcaligenes	0.134276
g__Bacteriovorax	0.132198
g__Delftia	0.131659
g__Porticoccus	0.128833
g__Salinihabitans	0.128189
g__Geopsychrobacter	0.125715
g__Porphyromonas	0.124964
g__Arsenophonus	0.124408
g__Oleibacter	0.122827
g__Streptohalobacillus	0.122554
g__Xanthomonas	0.122428
g__Sansalvadorimonas	0.121294
g__Lampropedia	0.118252
g__Pseudoglutamicibacter	0.117939
g__Oceanicoccus	0.117672
g__Pseudoxanthomonas	0.117036
g__Stenotrophobium	0.116099
g__Elizabethkingia	0.113408
g__Immundisolibacter	0.112883
g__Eoetvoesia	0.112237
g__Vulgatibacter	0.106786
g__Aromatoleum	0.106662
g__Trichoderma	0.102448
g__Peptoniphilus	0.102353
g__Gemella	0.101528
g__Marichromatium	0.0981028
g__Dyadobacter	0.0969344
k__Bacteria_p__Actinobacteria_c__Actinobacteria_o__Propionibacteriales_f__Propionibacteriaceae_g__Ponticoccus	0.0967645
g__Tepidiphilus	0.096206
g__Extensimonas	0.0957937
g__Xylella	0.0955984
k__Bacteria_p___c___o___f___g__	0.0955683
g__Sediminibacterium	0.0949417
g__Chryseobacterium	0.0928911
g__Gulosibacter	0.0923784
g__Chitinolyticbacter	0.0917596
g__Paraburkholderia	0.089308
g__Kriegella	0.0889114
g__Yangia	0.088218
g__Algibacter	0.0871781
g__Thermochromatium	0.085659
g__Enhydrobacter	0.0855753
g__Pleomorphomonas	0.0848388
g__Caryophanon	0.0843197
g__Morganella	0.083578
g__Grimontia	0.0829882
g__Nitrobacter	0.0829157
g__Fonticella	0.0819378
g__Acrocarpospora	0.0815946
g__Pueribacillus	0.080322
g__Cruoricaptor	0.0798663
g__Aeromonas	0.0796819
g__Methylobrevis	0.0793303
g__Rudaea	0.0788443
g__Sulfuricaulis	0.078451
g__Desulfocapsa	0.0774835
g__Pseudarthrobacter	0.0767562
k__Bacteria_p__Firmicutes_c__Bacilli_o__Bacillales_f__Bacillaceae_g__	0.0747693
g__Propioniferax	0.0738481
g__Pigmentiphaga	0.073607
g__Empedobacter	0.07292
g__Enorma	0.0720234
k__Bacteria_p__Proteobacteria_c__Alphaproteobacteria_o__Rhodospirillales_f__Rhodospirillaceae_g__	0.071588
g__Luteimonas	0.0705644
g__Gallibacterium	0.0699331
g__Zoogloea	0.0696216
g__Synchytrium	0.0692205
g__Winkia	0.0692092
g__Bythopirellula	0.0690755
g__Pseudopedobacter	0.067779
g__Aerosticca	0.0665082
g__Photorhabdus	0.0645424
k__Bacteria_p__Bacteroidetes_c__Bacteroidia_o__Bacteroidales_f__Prevotellaceae_g__	0.0641256
g__Tepidimonas	0.0634898
g__Aliikangiella	0.0632591
g__Pseudoxanthobacter	0.0630276
g__Roseivirga	0.0614758
g__Halocynthiibacter	0.0610296
g__Wenxinia	0.0598138
g__Bordetella	0.057923
g__Heliobacillus	0.0574374
g__Xenophilus	0.0574089
g__Tenacibaculum	0.0565727
g__Veillonella	0.0563827
g__Adhaeribacter	0.0558318
g__Marinicella	0.0545168
g__Tepidibacillus	0.0543088
g__Pseudokineococcus	0.0542782
g__Paraperlucidibaca	0.0527392
g__Aureitalea	0.0516731
g__Thermaerobacter	0.0516273
g__Phytobacter	0.0507376
g__Fluviicola	0.0503116
g__Polaribacter	0.0500419
g__Propionicimonas	0.0496804
g__Nitrospirillum	0.0492454
g__Campylobacter	0.0491214
g__Aquimarina	0.0486705
g__Starkeya	0.0479884
g__Rubritepida	0.0476129
g__Paenirhodobacter	0.0461155
g__Desulfitibacter	0.0456605
g__Achromobacter	0.0456167
g__Williamsia	0.043879
g__Pantoea	0.0437684
g__Gelidibacter	0.0434041
g__Enterobacter	0.0432116
g__Micrococcus	0.0430531
g__Miniphocibacter	0.0418775
g__Allosalinactinospora	0.0395198
g__Azoarcus	0.0393636
g__Arcticibacterium	0.0390195
g__Methylocapsa	0.0384966
g__Sporobacter	0.038131
g__Thalassotalea	0.0379508
g__Aureicoccus	0.0378735
g__Haliscomenobacter	0.0377228
g__Psychromonas	0.0367925
g__Parasporobacterium	0.0367048
g__Pseudogulbenkiania	0.0362151
g__Apibacter	0.0361042
g__Balneicella	0.0356364
g__Flaviflexus	0.0352486
g__Gordonia	0.0347463
k__Bacteria_p__Proteobacteria_c__Alphaproteobacteria_o__Rhizobiales_f__Beijerinckiaceae_g__	0.0342629
g__Acidithrix	0.0342
g__Mariniflexile	0.0337834
g__Mangrovimonas	0.0331541
g__Yoonia	0.03274
g__Novispirillum	0.0320876
g__Galbibacter	0.0311959
g__Xanthobacter	0.0307793
g__Cellulophaga	0.0306179
g__Caedibacter	0.0306032
g__Qipengyuania	0.0302916
g__Collimonas	0.0300188
g__Pragia	0.0297375
g__Novosphingopyxis	0.0294058
g__Actinotignum	0.0292646
g__Dyella	0.0289773
g__Psychroflexus	0.0287551
g__Kordia	0.0284368
g__Petrimonas	0.0282859
g__Mitosporidium	0.0278944
g__Pulveribacter	0.0276878
g__Sinomicrobium	0.027646
g__Synechococcus	0.0271126
g__Solimicrobium	0.0268316
g__Persephonella	0.0267865
g__Eremococcus	0.0266629
g__Afipia	0.0260081
g__Pustulibacterium	0.0256827
g__Methylomicrobium	0.0254452
g__Tamlana	0.0241021
g__Psychroserpens	0.0240109
g__Patulibacter	0.0236399
g__Robertkochia	0.0234303
g__Thalassobius	0.0229068
g__Cupriavidus	0.0228984
g__Mesoflavibacter	0.0228046
g__Anaerophaga	0.0227976
g__Blattabacterium	0.0226241
k__Bacteria_p__Bacteroidetes_c__Bacteroidia_o__Bacteroidales_f___g__	0.0223423
g__Thermoleophilum	0.0218647
g__Luteococcus	0.0218433
g__Leptobacterium	0.0208513
g__Desulfurella	0.02074
g__Salinimicrobium	0.0206893
g__Roseimaritima	0.0205528
g__Cylindrospermum	0.0203658
g__Kroppenstedtia	0.0200039
g__Aliifodinibius	0.0197552
g__Phaeocystidibacter	0.0195472
g__Lewinella	0.019422
g__Solibacillus	0.0193653
g__Bizionia	0.0190586
g__Joostella	0.0187619
g__Alteribacillus	0.0185833
g__Proteiniphilum	0.0185037
g__Muriicola	0.0181949
g__Oceanivirga	0.0178531
g__Longicatena	0.0177749
g__Meridianimaribacter	0.0176448
g__Dokdonia	0.0174053
g__Antarcticibacterium	0.0173069
g__Hyunsoonleella	0.0170575
g__Arenitalea	0.0167788
g__Formosa	0.0167639
g__Lutibacter	0.0166198
g__Altibacter	0.016537
g__Winogradskyella	0.0165211
g__Baekduia	0.0164815
g__Gillisia	0.0162496
k__Bacteria_p__Bacteroidetes_c__Flavobacteriia_o__Flavobacteriales_f__Flavobacteriaceae_g__	0.0160918
g__Marinilabilia	0.0153728
g__Ferrimicrobium	0.0153709
g__Amphiplicatus	0.0151104
g__Arenibacter	0.015038
g__Ochrovirga	0.0144979
g__Sulfurospirillum	0.0144344
g__Acidipropionibacterium	0.0143214
k__Bacteria_p__Bacteroidetes_c__Bacteroidia_o__Bacteroidales_f__Dysgonamonadaceae_g__	0.0141264
g__Olleya	0.0136342
g__Cardiobacterium	0.0131545
g__Thiofilum	0.0131002
g__Flexilinea	0.0126517
g__Tistrella	0.0123791
g__Hyphomonas	0.0117808
g__Sebaldella	0.0116351
g__Geminocystis	0.0112619
g__Urechidicola	0.011248
g__Vulcaniibacterium	0.0109133
g__Seonamhaeicola	0.0105986
g__Flagellimonas	0.0105446
g__Imtechella	0.0103747
g__Chimaeribacter	0.0103263
g__Kerstersia	0.0102498
g__Oceanihabitans	0.0101099
g__Gloeobacter	0.00995019
g__Serpentinicella	0.0099272
g__Salinarimonas	0.00988281
g__Changchengzhania	0.00971036
g__Flexibacter	0.00890834
g__Maribacter	0.00886437
g__Croceitalea	0.00864075
g__Aestuariimicrobium	0.00742324
g__Croceibacterium	0.00695174
g__Gracilimonas	0.00682645
g__Isobaculum	0.00653215
g__Ulvibacter	0.00588316
g__Henriciella	0.00532469
g__Chryseotalea	0.00500952
g__Leeia	0.00487586
g__Euzebyella	0.00486431
g__Succinimonas	0.00456994
g__Castellaniella	0.00394572
g__Flavivirga	0.00391822
g__Aequorivita	0.00336402
g__Xanthomarina	0.00335704
g__Jejuia	0.00327808
g__Aestuariibacter	0.00315756
g__Hanstruepera	0.00208814
g__Klenkia	0.00158714
g__Spongiivirga	0.00146019
g__Nioella	0.0014371
g__Lascolabacillus	0.000490825
g__Kalamiella	0.000383121
g__Gramella	0.000367228

## Sheet: GBM
feature	score
g__Mangrovicoccus	0.24007
k__Bacteria_p__Firmicutes_c__Clostridia_o__Clostridiales_f__Ruminococcaceae_g__	0.173772
g__Malassezia	0.166069
g__Rhodoblastus	0.151009
g__Ewingella	0.144002
g__Lichenibacterium	0.134116
g__Myroides	0.125552
g__Kushneria	0.124431
g__Pauljensenia	0.121486
g__Acuticoccus	0.118167
g__Pyrinomonas	0.112843
g__Phocoenobacter	0.112769
g__Salinispora	0.109834
g__Gloeomargarita	0.103236
g__Actinomadura	0.0997312
g__Pseudooceanicola	0.0989027
g__Enterocloster	0.0966114
g__Acholeplasma	0.0962928
g__Leptotrichia	0.0960885
k__Bacteria_p__Proteobacteria_c__Epsilonproteobacteria_o__Campylobacterales_f__Campylobacteraceae_g__	0.0936261
g__Jatrophihabitans	0.0923317
g__Delftia	0.0862329
g__Fischerella	0.0829215
g__Ochrobactrum	0.0808083
g__Kurthia	0.0805107
g__Crossiella	0.0775236
g__Spirosoma	0.0772226
g__Streptosporangium	0.0765995
g__Histophilus	0.0760216
g__Parabacteroides	0.0755779
g__Planctopirus	0.0751646
g__Avibacterium	0.0741145
g__Ramularia	0.0732814
g__Nocardioides	0.073063
g__Lentzea	0.0726806
g__Chroococcidiopsis	0.0712173
g__Marinitenerispora	0.0705899
g__Kibdelosporangium	0.07029
g__Stanieria	0.0688309
g__Mobilicoccus	0.0665864
g__Scytonema	0.0661955
g__Alloprevotella	0.0647208
g__Saezia	0.0583604
g__Gordonia	0.0575367
g__Thermosynechococcus	0.0572193
g__Acaryochloris	0.0567159
g__Pleurocapsa	0.0558292
g__Rhodoluna	0.0531008
g__Prosthecobacter	0.0526889
g__Gulosibacter	0.0523209
g__Mycobacterium	0.0522161
g__Ursidibacter	0.0503643
g__Pimelobacter	0.0500779
g__Pelagivirga	0.049285
g__Sphaerospermopsis	0.0473471
g__Idiomarina	0.0468544
g__Hydrococcus	0.0456423
g__Leucobacter	0.0448692
g__Nicoletella	0.044114
g__Mobiluncus	0.0429018
g__Tsukamurella	0.0426422
g__Euhalothece	0.0420264
g__Thermus	0.04194
g__Methylocella	0.0415061
g__Schaalia	0.0411868
g__Prochlorothrix	0.040886
g__Klenkia	0.0405476
k__Bacteria_p__Firmicutes_c__Bacilli_o__Lactobacillales_f___g__	0.0400424
g__Calidifontibacter	0.03988
g__Rickettsia	0.0397085
g__Veillonella	0.0396711
g__Auraticoccus	0.0391736
g__Mannheimia	0.0382076
g__Marmoricola	0.0382064
g__Actinobaculum	0.0381023
g__Mycolicibacter	0.0372414
g__Halomicronema	0.0371057
g__Haloactinopolyspora	0.0364178
g__Facklamia	0.0362512
g__Nodularia	0.0362214
k__Bacteria_p__Proteobacteria_c__Gammaproteobacteria_o__Pasteurellales_f__Pasteurellaceae_g__	0.0360193
g__Tolypothrix	0.0341147
g__Raphidiopsis	0.0338882
g__Leptolyngbya	0.0337699
g__Haemophilus	0.0336626
k__Bacteria_p___c___o___f___g__	0.0307537
g__Erysipelatoclostridium	0.0267921
g__Gaeumannomyces	0.0259865
g__Quadrisphaera	0.0257543
g__Listeria	0.0237087
g__Dactylosporangium	0.0235594
g__Calothrix	0.0234409
g__Synechococcus	0.0234286
g__Basfia	0.0231966
g__Kribbella	0.0223623
g__Haloglycomyces	0.0221385
g__Limnothrix	0.0218964
g__Auritidibacter	0.0218722
g__Actinospica	0.0211841
g__Aphanizomenon	0.0206871
g__Cedecea	0.0204837
g__Megasphaera	0.0186899
g__Aeromicrobium	0.0186083
g__Neisseria	0.0182635
g__Allokutzneria	0.0182044
g__Thiothrix	0.0177214
g__Microlunatus	0.0174256
g__Pediococcus	0.0171506
g__Actinoplanes	0.0168545
g__Desulfuribacillus	0.0167677
g__Rippkaea	0.0163898
g__Floricoccus	0.0158442
g__Bibersteinia	0.0157883
g__Nostoc	0.0155794
g__Macrococcus	0.014273
g__Vespertiliibacter	0.0139055
g__Podospora	0.0108549
g__Cohnella	0.0107494
g__Acrocarpospora	0.0100311
g__Pseudobutyrivibrio	0.0099919
g__Methylobacterium	0.00776009
g__Rummeliibacillus	0.00773317
g__Naumannella	0.00522044
g__Microtetraspora	0.00307182
g__Aquimarina	0.00271425
g__Caviibacterium	0.00232738
g__Mastigocoleus	0.00188958
g__Bisgaardia	0.000612346
g__Actinophytocola	0.000166257
g__Conservatibacter	0.000132791

## Sheet: HNSC
feature	score
g__Eggerthia	0.298741
g__Jaminaea	0.247258
g__Dialister	0.24283
g__Anaerocolumna	0.241504
g__Gudongella	0.226277
g__Parabacteroides	0.212154
g__Alterileibacterium	0.211524
g__Petrimonas	0.209532
g__Odoribacter	0.203869
g__Mangrovicoccus	0.19853
k__Bacteria_p__Firmicutes_c__Clostridia_o__Clostridiales_f__Peptostreptococcaceae_g__	0.197878
g__Pedobacter	0.195119
g__Cryptococcus	0.193391
g__Eubacterium	0.191161
g__Schaalia	0.180794
g__Histoplasma	0.177177
g__Aminicella	0.177092
k__Bacteria_p__Proteobacteria_c__Gammaproteobacteria_o__Pasteurellales_f__Pasteurellaceae_g__	0.176689
g__Thioflexothrix	0.174967
g__Dielma	0.174302
g__Pyricularia	0.170571
g__Crocosphaera	0.161738
g__Actinobacillus	0.160447
g__Bisgaardia	0.159804
g__Intestinibaculum	0.159428
g__Negativicoccus	0.157347
k__Bacteria_p__Firmicutes_c__Tissierellia_o___f___g__	0.157065
g__Paenibacillus	0.154897
g__Suicoccus	0.154157
g__Sebaldella	0.154157
g__Paludibacter	0.14876
g__Tannerella	0.148492
g__Parvimonas	0.148165
g__Anaerosphaera	0.146483
g__Extibacter	0.138949
g__Mycoplasma	0.138581
g__Butyricimonas	0.137669
g__Basfia	0.137074
k__Bacteria_p__Proteobacteria_c__Epsilonproteobacteria_o__Campylobacterales_f__Campylobacteraceae_g__	0.131869
g__Acholeplasma	0.131665
g__Haemophilus	0.131034
g__Lysinibacillus	0.128637
g__Bulleidia	0.126107
g__Puniceibacterium	0.125939
g__Litorilinea	0.121366
g__Rodentibacter	0.121094
g__Colletotrichum	0.118895
g__Marinifilum	0.118518
g__Paramaledivibacter	0.114264
g__Trichoderma	0.112707
g__Bibersteinia	0.111462
g__Terrisporobacter	0.111385
g__Proteiniphilum	0.108105
k__Bacteria_p__Bacteroidetes_c__Bacteroidia_o__Bacteroidales_f__Prevotellaceae_g__	0.106109
g__Arcobacter	0.105272
g__Anaerococcus	0.105191
g__Schwartzia	0.105056
g__Virgibacillus	0.104989
g__Hathewaya	0.104885
g__Corallococcus	0.102294
g__Metaprevotella	0.101569
g__Mogibacterium	0.100076
g__Idiomarina	0.0994826
g__Oceanotoga	0.0989874
g__Lascolabacillus	0.0981064
g__Sneathia	0.0976838
g__Cricetibacter	0.0949792
g__Solobacterium	0.0947815
g__Photobacterium	0.0944061
g__Massilibacteroides	0.0926581
g__Catellicoccus	0.0922086
g__Paracraurococcus	0.0913154
g__Testudinibacter	0.0911856
g__Ezakiella	0.0910838
g__Simonsiella	0.0881181
g__Riemerella	0.0855245
g__Terribacillus	0.0854669
g__Christensenella	0.0832452
g__Roseburia	0.0816899
g__Alloprevotella	0.0815623
g__Paeniclostridium	0.0804546
g__Nicoletella	0.0800863
k__Bacteria_p__Bacteroidetes_c__Bacteroidia_o__Bacteroidales_f__Muribaculaceae_g__	0.0783441
g__Dankookia	0.0779068
g__Caviibacterium	0.0770859
k__Bacteria_p__Firmicutes_c__Clostridia_o__Clostridiales_f__Clostridiales.Family.XIII..Incertae.Sedis_g__	0.0762144
g__Phocoenobacter	0.0755636
g__Miniphocibacter	0.0750144
g__Frankia	0.0727396
g__Fastidiosipila	0.0720139
g__Fenollaria	0.0717447
g__Globicatella	0.0707716
g__Histophilus	0.0707284
g__Metasolibacillus	0.0704286
g__Xanthobacter	0.068988
g__Romboutsia	0.0687756
g__Brachyspira	0.0685659
g__Culturomica	0.0678925
g__Kushneria	0.067578
g__Vibrio	0.0670091
g__Catenovulum	0.0666652
g__Paeniglutamicibacter	0.0662446
g__Defluviitalea	0.0649252
g__Aggregatibacter	0.0638177
g__Muricomes	0.0636407
g__Pectinatus	0.0631067
g__Gottschalkia	0.062669
g__Peptoniphilus	0.0626522
g__Duncaniella	0.0609887
g__Aminipila	0.0586096
g__Gracilibacillus	0.0574043
k__Bacteria_p__Firmicutes_c__Clostridia_o__Clostridiales_f__Eubacteriaceae_g__	0.0571428
g__Aspergillus	0.0565913
g__Frederiksenia	0.0565044
g__Gemella	0.054641
g__Anaerovirgula	0.0541704
g__Pasteurella	0.0536025
g__Streptomyces	0.0514375
g__Emergencia	0.0512568
g__Conservatibacter	0.0446606
g__Sporomusa	0.0439876
g__Oceanivirga	0.0421937
g__Avibacterium	0.0415878
g__Streptobacillus	0.0411475
g__Faecalicatena	0.0410232
g__Malassezia	0.0409544
g__Salinivibrio	0.040558
g__Neofamilia	0.0399992
g__Oribacterium	0.0386066
g__Muribaculum	0.0375387
g__Cardiobacterium	0.0368281
g__Faecalibacillus	0.0352621
g__Longibaculum	0.0351101
g__Cerasibacillus	0.0350204
g__Mediterraneibacter	0.0345724
g__Atopostipes	0.0343267
g__Hoeflea	0.0342302
g__Finegoldia	0.0340149
g__Moritella	0.0337171
g__Eikenella	0.0328941
g__Mycobacterium	0.0328379
g__Rhodoplanes	0.0326397
g__Vagococcus	0.0320271
g__Paludifilum	0.0311243
g__Ureaplasma	0.0304933
g__Megasphaera	0.0301153
g__Leptotrichia	0.0297145
g__Centipeda	0.0294807
g__Gallibacterium	0.0290424
g__Keratinibaculum	0.0290395
g__Lachnoanaerobaculum	0.0287804
g__Anaplasma	0.0287553
g__Dysgonomonas	0.028612
g__Shuttleworthia	0.0284654
g__Sanguibacteroides	0.0281572
g__Lonepinella	0.0275718
g__Mannheimia	0.0264217
g__Barnesiella	0.0258999
g__Vespertiliibacter	0.0250885
g__Treponema	0.025044
g__Arthrospira	0.0249839
g__Oceanibium	0.0247944
g__Rubrivivax	0.0246592
g__Porphyromonas	0.0239635
g__Nocardia	0.0229863
g__Saezia	0.0228774
g__Anaeroglobus	0.0227862
g__Muribacter	0.0223008
g__Amorphotheca	0.0213162
g__Johnsonella	0.0205724
g__Peptococcus	0.0200188
g__Rikenella	0.0190466
g__Anaerostipes	0.0188881
g__Peptostreptococcus	0.018568
g__Desulfofarcimen	0.016131
g__Chelonobacter	0.0159835
g__Anaerotignum	0.0153474
g__Helcococcus	0.0138237
g__Angelakisella	0.0130948
g__Ursidibacter	0.0130676
g__Prevotella	0.012484
g__Fusobacterium	0.0121322
g__Zobellia	0.00861788
g__Aerococcus	0.00834056
g__Anaerovibrio	0.00820214
g__Urinicoccus	0.00769288
g__Provencibacterium	0.00734981
g__Acinetobacter	0.00473502
g__Vaginisenegalia	0.00464521
g__Slackia	0.00449809
g__Alkalibaculum	0.00326215
k__Bacteria_p__Proteobacteria_c__Gammaproteobacteria_o___f___g__	0.00194135
g__Salinicoccus	0.00183987
g__Aphanothece	0.0014207
g__Tepidibacter	0.00108522
g__Cetobacterium	0.00097893

## Sheet: KICH
feature	score
g__Yimella	0.262417
g__Piscinibacter	0.231219
g__Gleimia	0.175534
g__Alistipes	0.134068
g__Cedecea	0.127926
g__Thalassococcus	0.119528
g__Thermomonospora	0.118408
g__Limnohabitans	0.115389
g__Akkermansia	0.107695
g__Pseudacidovorax	0.103219
g__Mixta	0.0975263
g__Lactococcus	0.0950781
g__Necropsobacter	0.092024
g__Tatumella	0.0919776
k__Bacteria_p__Firmicutes_c__Bacilli_o__Lactobacillales_f__Streptococcaceae_g__	0.0893782
g__Kocuria	0.0859919
g__Xanthobacter	0.0848698
g__Actinophytocola	0.0811629
g__Dialister	0.0800779
k__Bacteria_p__Firmicutes_c__Clostridia_o__Clostridiales_f__Ruminococcaceae_g__	0.0793244
g__Bacteroides	0.0774606
g__Aliivibrio	0.0693798
g__Dorea	0.0665559
g__Chania	0.0658868
g__Lelliottia	0.0657841
g__Lunatimonas	0.0642581
g__Aggregatibacter	0.0604217
g__Janibacter	0.0593942
g__Shinella	0.0573105
g__Gallibacterium	0.0568577
g__Acidovorax	0.0516876
g__Actinobacillus	0.0506371
g__Methylotetracoccus	0.0478403
g__Caballeronia	0.0465481
g__Providencia	0.0462026
g__Klebsiella	0.0437947
g__Ochrobactrum	0.0436599
g__Rappaport	0.0432075
g__Carboxydothermus	0.0404635
g__Gilliamella	0.0402546
g__Delftia	0.0363539
g__Parabacteroides	0.036147
g__Exophiala	0.0357661
g__Leclercia	0.0352998
g__Thalassobacter	0.0341348
g__Micrococcus	0.0340523
g__Edaphovirga	0.0339091
g__Escherichia	0.0332547
g__Pleomorphomonas	0.0330219
g__Grimontia	0.032611
g__Phytobacter	0.032182
g__Kluyvera	0.0320555
g__Proteus	0.0314727
g__Siccibacter	0.0296315
g__Neisseria	0.0286891
g__Salmonella	0.0278468
g__Mediterraneibacter	0.0268321
g__Metakosakonia	0.0254535
g__Nissabacter	0.0223937
g__Bordetella	0.0222888
g__Capnocytophaga	0.0208542
g__Actinocorallia	0.020844
g__Frischella	0.0201595
g__Segeticoccus	0.0193864
g__Franconibacter	0.0189022
g__Kalamiella	0.017658
g__Obesumbacterium	0.0165461
g__Brenneria	0.0155046
g__Tannerella	0.0148903
g__Rahnella	0.0131856
g__Raoultella	0.013171
g__Cronobacter	0.0126831
g__Citrobacter	0.012186
g__Edwardsiella	0.0120982
g__Atlantibacter	0.0111352
g__Zobellella	0.0104871
g__Chimaeribacter	0.0104732
g__Photorhabdus	0.00860916
g__Arsenophonus	0.00825138
g__Moesziomyces	0.00689653
g__Pantoea	0.00550808
g__Hafnia	0.00497534
g__Yersinia	0.00334006
g__Pluralibacter	0.00272741
g__Stenotrophomonas	0.0017848
g__Ruminococcus	0.00175811
g__Morganella	0.00172012
g__Yokenella	0.000878338
g__Kosakonia	0.00071267

## Sheet: KIRC
feature	score
g__Fluoribacter	0.278632
g__Empedobacter	0.179629
g__Methylomagnum	0.163033
g__Iodobacter	0.105208
g__Promicromonospora	0.100479
g__Pseudosporangium	0.0936758
g__Labilithrix	0.0905987
g__Methylophilus	0.089355
g__Pseudoduganella	0.0803262
g__Krasilnikovia	0.0741535
g__Wohlfahrtiimonas	0.0667173
g__Methylotenera	0.0663286
g__Methylobacillus	0.0614077
g__Alloactinosynnema	0.0573495
g__Oxalobacter	0.0571793
g__Duganella	0.0564176
g__Desulfofundulus	0.0556634
g__Couchioplanes	0.0549998
g__Streptomonospora	0.0545178
g__Catenuloplanes	0.0532591
g__Melghiribacillus	0.052898
g__Kineococcus	0.0515267
g__Gallionella	0.0512312
g__Sutterella	0.0469725
g__Actinoplanes	0.0465818
g__Heliorestis	0.0462918
g__Microbispora	0.0460605
g__Algoriella	0.0460359
g__Thiohalocapsa	0.0459739
g__Bryocella	0.0453918
g__Frondihabitans	0.0445173
g__Uliginosibacterium	0.0434544
g__Henriciella	0.0429288
g__Prauserella	0.0428734
g__Taylorella	0.0424944
k__Bacteria_p__Bacteroidetes_c__Bacteroidia_o__Bacteroidales_f__Dysgonamonadaceae_g__	0.0423225
g__Rariglobus	0.0411102
g__Rarobacter	0.0406441
g__Sinimarinibacterium	0.0401064
g__Mycetocola	0.0398027
g__Verrucosispora	0.0391308
g__Paenalcaligenes	0.0375796
g__Polynucleobacter	0.0366215
g__Parvibium	0.0363438
g__Ferriphaselus	0.0363032
g__Haloactinobacterium	0.0357817
g__Luteimicrobium	0.0334298
g__Kribbella	0.0320552
g__Lacunisphaera	0.0318791
g__Lentzea	0.029748
g__Ignatzschineria	0.0296925
g__Mycoavidus	0.0288831
g__Desulfovibrio	0.0273159
g__Aeromicrobium	0.0267227
g__Sulfuricella	0.0266004
g__Chryseolinea	0.0264323
g__Asanoa	0.0257422
g__Thermosporothrix	0.0255373
g__Microcella	0.0254655
g__Chitinilyticum	0.0253181
g__Chondromyces	0.0250844
g__Undibacterium	0.0245566
g__Sulfurivermis	0.0245178
g__Isoptericola	0.0231612
g__Rhodoglobus	0.0225716
g__Lacisediminimonas	0.0223713
g__Solimicrobium	0.0221319
g__Trinickia	0.0218202
g__Herbiconiux	0.0204064
g__Plantibacter	0.020018
g__Nitrosovibrio	0.0199898
g__Limimonas	0.019924
g__Herminiimonas	0.0193376
g__Mobiluncus	0.0191658
g__Sulfuritortus	0.0189039
g__Stackebrandtia	0.018682
g__Cellulophaga	0.0181364
g__Nibricoccus	0.0181065
g__Pelobium	0.0174366
g__Gelidibacter	0.0174219
g__Myxococcus	0.0170683
g__Mumia	0.0169776
g__Labedella	0.016685
g__Nonlabens	0.0153145
g__Ephemeroptericola	0.015214
g__Knoellia	0.0151787
g__Noviherbaspirillum	0.0147518
g__Polycyclovorans	0.0141257
g__Herbaspirillum	0.0135657
g__Melittangium	0.0134641
g__Pandoraea	0.0132062
g__Glaciibacter	0.0122131
g__Aquitalea	0.012204
g__Agreia	0.0118999
g__Nitrosospira	0.00901144
g__Paucimonas	0.00848084
g__Salegentibacter	0.00846987
g__Methylovorus	0.00743718
g__Salinispora	0.00690143
g__Polymorphum	0.00673017
g__Cystobacter	0.00621703
g__Krasilnikoviella	0.0060483
g__Plesiocystis	0.00420045
g__Collimonas	0.00361586
g__Opitutus	0.00156156
g__Microterricola	0.000870448
g__Sapientia	0.000805125
g__Jishengella	0.000127584

## Sheet: KIRP
feature	score
g__Idiomarina	0.528832
g__Haemophilus	0.288641
g__Nakamurella	0.212
g__Edwardsiella	0.205
g__Caldicellulosiruptor	0.20032
g__Sordaria	0.186152
g__Paenarthrobacter	0.162954
g__Kushneria	0.144205
g__Bordetella	0.142292
g__Roseomonas	0.137735
g__Deinococcus	0.135263
g__Heliobacterium	0.134533
g__Paludifilum	0.130059
g__Microbacterium	0.126519
g__Mycobacteroides	0.125042
g__Acetobacter	0.106244
g__Dietzia	0.102974
g__Streptomyces	0.100388
g__Enterococcus	0.0997271
g__Levyella	0.0974319
g__Blastococcus	0.0964647
g__Chania	0.0929727
g__Tepidimonas	0.0923805
g__Eubacterium	0.0897342
g__Weeksella	0.0895804
k__Bacteria_p__Proteobacteria_c__Gammaproteobacteria_o___f___g__	0.0877298
g__Pectobacterium	0.0727752
g__Nocardia	0.072525
g__Mycolicibacterium	0.0717277
g__Sanguibacteroides	0.0701928
g__Pseudoxanthomonas	0.0701389
g__Steroidobacter	0.0699081
g__Kangiella	0.06973
g__Podospora	0.065166
g__Thermomonas	0.0601353
g__Gardnerella	0.0560554
g__Bifidobacterium	0.0522575
g__Pochonia	0.0509375
g__Bradyrhizobium	0.050927
g__Dermabacter	0.0499866
g__Acaromyces	0.0489613
g__Stereum	0.0469106
g__Hymenobacter	0.0460089
g__Mangrovicoccus	0.03787
g__Congregibacter	0.0362219
g__Orrella	0.0360271
g__Marixanthomonas	0.0347252
g__Shimwellia	0.0338306
g__Parahaliea	0.0271854
g__Ensifer	0.0268965
g__Scedosporium	0.0254276
g__Acetanaerobacterium	0.0229154
g__Rubrivivax	0.0217011
g__Alcanivorax	0.014651
g__Saezia	0.0143457
g__Sneathia	0.0136596
g__Pelagibacterium	0.0111993
g__Rhodomicrobium	0.00863517
g__Diplodia	0.0085304
g__Anaerobutyricum	0.00546226
g__Colwellia	0.00528407
g__Catenibacterium	0.00525848
g__Mageeibacillus	0.00254518
g__Sphingomonas	0.00241773
g__Flammeovirga	0.00143884

[truncated: 8 more sheets: LUAD, LUSC, OV, PRAD, READ, STAD, THCA, UCEC]
